# Supplementary material for: Coupling laboratory FTIR data with PROCODA kinetic modeling for the radiolysis of frozen formic acid using swift ions
Source: Royal Society of Chemistry journal article supplement (doi:10.1039/d5ra09577h), 2026-03-16
Supplement: d5ra09577h2.xlsx [file d5ra09577h2.xlsx]

## Sheet: Sheet1
k_name	Reactants	Products	DeltaH (Gas, 0K, kJ/mol)	k_value	k_unit	Single or Group reaction	k_position_in_ Group (faster to slower)	k_BR(%)
k1	H2 + R	H + H	432.06	1.30e-01	s^-1	Single (order=1)	-	100.00
k2	H + H	H2	-432.06	5.00e-23	cm^3 molecules^-1 s^-1	Single (order=2)	-	100.00
k3	C2 + R	C + C	602.8	2.43e-03	s^-1	Single (order=1)	-	100.00
k4	C + C	C2	-602.8	1.95e-23	cm^3 molecules^-1 s^-1	Single (order=2)	-	100.00
k5	C3 + R	C + C2	716.85	3.61e-03	s^-1	Single (order=1)	-	100.00
k6	C + C2	C3	-716.85	9.76e-24	cm^3 molecules^-1 s^-1	Single (order=2)	-	100.00
k7	C + C3	C2 + C2	114.05	1.06e-25	cm^3 molecules^-1 s^-1	Single (order=2)	[lower threshold for single (order=2)]	100.00
k8	O2 + R	O + O	493.68	6.42e-04	s^-1	Single (order=1)	-	100.00
k9	O + O	O2	-493.68	2.17e-23	cm^3 molecules^-1 s^-1	Single (order=2)	-	100.00
k10	O3 + R	O + O2	102.44	2.14e-03	s^-1	Single (order=1)	-	100.00
k11	O + O2	O3	-102.44	3.87e-23	cm^3 molecules^-1 s^-1	Single (order=2)	-	100.00
k12	O + O3	O2 + O2	-391.24	4.41e-23	cm^3 molecules^-1 s^-1	Single (order=2)	-	100.00
k13	CH + R	H + C	334.6	2.93e-03	s^-1	Single (order=1)	-	100.00
k14	H + C	CH	-334.6	3.58e-23	cm^3 molecules^-1 s^-1	Single (order=2)	-	100.00
k15	CH2 + R	H + CH	417.81	7.51e-02	s^-1	Group 31	[k33, k15]	36.26
k16	H + CH	CH2	-417.81	3.21e-23	cm^3 molecules^-1 s^-1	Group 72	[k16, k69]	99.29
k17	CH3 + R	H + CH2	457.21	4.52e-04	s^-1	Group 39	[k35, k17]	15.74
k18	H + CH2	CH3	-457.21	6.87e-24	cm^3 molecules^-1 s^-1	Group 73	[k18, k71]	37.40
k19	CH4 + R	H + CH3	432.45	6.09e-01	s^-1	Group 57	[k19, k36]	55.77
k20	H + CH3	CH4	-432.45	4.57e-23	cm^3 molecules^-1 s^-1	Group 80	[k20, k72]	99.78
k21	C2H3 + R	H + CHCH	143.65	3.36e-01	s^-1	Group 17	[k21, k44, k51]	40.28
k22	H + CHCH	C2H3	-143.65	6.34e-24	cm^3 molecules^-1 s^-1	Single (order=2)	-	100.00
k23	CH2CH2 + R	H + C2H3	456.4	1.90e-01	s^-1	Group 32	[k38, k23, k46, k52, k57]	15.30
k24	H + C2H3	CH2CH2	-456.4	4.23e-23	cm^3 molecules^-1 s^-1	Group 62	[k24, k76, k77]	45.92
k25	C2H5 + R	H + CH2CH2	145.54	8.42e-01	s^-1	Group 19	[k25, k39, k53, k58]	46.90
k26	H + CH2CH2	C2H5	-145.54	8.89e-24	cm^3 molecules^-1 s^-1	Group 74	[k26, k78]	98.85
k27	CH3CH3 + R	H + C2H5	415.8	1.53e-03	s^-1	Group 44	[k40, k63, k59, k27]	0.14
k28	H + C2H5	CH3CH3	-415.8	2.09e-23	cm^3 molecules^-1 s^-1	Group 64	[k28, k79, k81, k80]	29.86
k29	C3H4 + R	H + C3H3	377.41	7.04e-01	s^-1	Group 25	[k29, k60, k67, k48, k55]	44.35
k30	H + C3H3	C3H4	-377.41	4.66e-23	cm^3 molecules^-1 s^-1	Group 68	[k30, k84, k85]	59.19
k31	C3H5 + R	H + C3H4	228.75	1.37e-03	s^-1	Group 26	[k41, k65, k31, k56, k61, k49]	0.29
k32	H + C3H4	C3H5	-228.75	3.81e-23	cm^3 molecules^-1 s^-1	Group 69	[k32, k86, k87]	87.10
k33	CH2 + R	H2 + C	320.35	1.32e-01	s^-1	Group 31	[k33, k15]	63.74
k34	H2 + C	CH2	-320.35	1.34e-25	cm^3 molecules^-1 s^-1	Group 122	[k34, k70]	40.73
k35	CH3 + R	H2 + CH	442.96	2.42e-03	s^-1	Group 39	[k35, k17]	84.26
k36	CH4 + R	H2 + CH2	457.6	4.83e-01	s^-1	Group 57	[k19, k36]	44.23
k37	CHCH + R	H2 + C2	591.12	2.99e-01	s^-1	Group 58	[k37, k42, k50]	99.54
k38	CH2CH2 + R	H2 + CHCH	167.99	5.74e-01	s^-1	Group 32	[k38, k23, k46, k52, k57]	46.23
k39	C2H5 + R	H2 + C2H3	169.88	6.80e-01	s^-1	Group 19	[k25, k39, k53, k58]	37.87
k40	CH3CH3 + R	H2 + CH2CH2	129.28	8.15e-01	s^-1	Group 44	[k40, k63, k59, k27]	76.99
k41	C3H5 + R	H2 + C3H3	174.1	1.07e-01	s^-1	Group 26	[k41, k65, k31, k56, k61, k49]	22.99
k42	CHCH + R	C + CH2	873.57	7.35e-04	s^-1	Group 58	[k37, k42, k50]	0.24
k43	C + CH2	CHCH	-873.57	3.18e-23	cm^3 molecules^-1 s^-1	Group 5	[k43, k94, k96]	59.50
k44	C2H3 + R	C + CH3	560.01	4.98e-01	s^-1	Group 17	[k21, k44, k51]	59.70
k45	C + CH3	C2H3	-560.01	3.14e-25	cm^3 molecules^-1 s^-1	Group 6	[k45, k75, k97]	30.16
k46	CH2CH2 + R	C + CH4	583.96	1.09e-01	s^-1	Group 32	[k38, k23, k46, k52, k57]	8.78
k47	C3H3 + R	C + C2H3	658.61	7.76e-03	s^-1	Group 24	[k54, k64, k47]	1.79
k48	C3H4 + R	C + CH2CH2	579.62	9.41e-02	s^-1	Group 25	[k29, k60, k67, k48, k55]	5.93
k49	C3H5 + R	C + C2H5	662.83	1.48e-03	s^-1	Group 26	[k41, k65, k31, k56, k61, k49]	0.32
k50	CHCH + R	CH + CH	956.78	6.53e-04	s^-1	Group 58	[k37, k42, k50]	0.22
k51	C2H3 + R	CH + CH2	682.62	1.84e-04	s^-1	Group 17	[k21, k44, k51]	0.02
k52	CH2CH2 + R	CH + CH3	681.81	3.68e-01	s^-1	Group 32	[k38, k23, k46, k52, k57]	29.64
k53	C2H5 + R	CH + CH4	394.9	2.73e-01	s^-1	Group 19	[k25, k39, k53, k58]	15.20
k54	C3H3 + R	CH + CHCH	467.66	1.50e-01	s^-1	Group 24	[k54, k64, k47]	34.66
k55	C3H4 + R	CH + C2H3	701.42	5.91e-02	s^-1	Group 25	[k29, k60, k67, k48, k55]	3.72
k56	C3H5 + R	CH + CH2CH2	473.77	1.96e-02	s^-1	Group 26	[k41, k65, k31, k56, k61, k49]	4.21
k57	CH2CH2 + R	CH2 + CH2	721.21	7.28e-04	s^-1	Group 32	[k38, k23, k46, k52, k57]	0.06
k58	C2H5 + R	CH2 + CH3	409.54	4.79e-04	s^-1	Group 19	[k25, k39, k53, k58]	0.03
k59	CH3CH3 + R	CH2 + CH4	392.89	1.71e-02	s^-1	Group 44	[k40, k63, k59, k27]	1.62
k60	C3H4 + R	CH2 + CHCH	427.26	5.25e-01	s^-1	Group 25	[k29, k60, k67, k48, k55]	33.08
k61	C3H5 + R	CH2 + C2H3	512.36	1.79e-02	s^-1	Group 26	[k41, k65, k31, k56, k61, k49]	3.85
k62	CH3CH2CH3 + R	CH2 + CH3CH3	405.38	4.73e-04	s^-1	Group 41	[k68, k66, k62]	0.20
k63	CH3CH3 + R	CH3 + CH3	368.13	2.25e-01	s^-1	Group 44	[k40, k63, k59, k27]	21.25
k64	C3H3 + R	CH3 + C2	615.82	2.75e-01	s^-1	Group 24	[k54, k64, k47]	63.55
k65	C3H5 + R	CH3 + CHCH	198.8	3.18e-01	s^-1	Group 26	[k41, k65, k31, k56, k61, k49]	68.34
k66	CH3CH2CH3 + R	CH3 + C2H5	363.97	1.19e-02	s^-1	Group 41	[k68, k66, k62]	4.91
k67	C3H4 + R	CH4 + C2	560.78	2.05e-01	s^-1	Group 25	[k29, k60, k67, k48, k55]	12.92
k68	CH3CH2CH3 + R	CH4 + CH2CH2	77.06	2.30e-01	s^-1	Group 41	[k68, k66, k62]	94.90
k69	H + CH	H2 + C	-97.46	2.31e-25	cm^3 molecules^-1 s^-1	Group 72	[k16, k69]	0.71
k70	H2 + C	H + CH	97.46	1.95e-25	cm^3 molecules^-1 s^-1	Group 122	[k34, k70]	59.27
k71	H + CH2	H2 + CH	-14.25	1.15e-23	cm^3 molecules^-1 s^-1	Group 73	[k18, k71]	62.60
k72	H + CH3	H2 + CH2	25.15	1.00e-25	cm^3 molecules^-1 s^-1	Group 80	[k20, k72]	0.22
k73	H + CH4	H2 + CH3	0.39	7.73e-24	cm^3 molecules^-1 s^-1	Single (order=2)	-	100.00
k74	C + CH	H + C2	-268.2	1.47e-23	cm^3 molecules^-1 s^-1	Single (order=2)	-	100.00
k75	C + CH3	H + CHCH	-416.36	4.63e-25	cm^3 molecules^-1 s^-1	Group 6	[k45, k75, k97]	44.48
k76	H + C2H3	H2 + CHCH	-288.41	4.97e-23	cm^3 molecules^-1 s^-1	Group 62	[k24, k76, k77]	53.96
k77	H + C2H3	C + CH4	127.56	1.10e-25	cm^3 molecules^-1 s^-1	Group 62	[k24, k76, k77]	0.12
k78	H + CH2CH2	H2 + C2H3	24.34	1.03e-25	cm^3 molecules^-1 s^-1	Group 74	[k26, k78]	1.15
k79	H + C2H5	H2 + CH2CH2	-286.52	3.78e-23	cm^3 molecules^-1 s^-1	Group 64	[k28, k79, k81, k80]	54.00
k80	H + C2H5	CH2 + CH4	-22.91	9.50e-26	cm^3 molecules^-1 s^-1	Group 64	[k28, k79, k81, k80]	0.14
k81	H + C2H5	CH3 + CH3	-47.67	1.12e-23	cm^3 molecules^-1 s^-1	Group 64	[k28, k79, k81, k80]	16.00
k82	H + CH3CH3	H2 + C2H5	-16.26	8.67e-25	cm^3 molecules^-1 s^-1	Group 85	[k83, k82]	2.07
k83	H + CH3CH3	CH3 + CH4	-64.32	4.10e-23	cm^3 molecules^-1 s^-1	Group 85	[k83, k82]	97.93
k84	H + C3H3	CH2 + CHCH	49.85	3.20e-23	cm^3 molecules^-1 s^-1	Group 68	[k30, k84, k85]	40.65
k85	H + C3H3	CH4 + C2	183.37	1.27e-25	cm^3 molecules^-1 s^-1	Group 68	[k30, k84, k85]	0.16
k86	H + C3H4	H2 + C3H3	-54.65	5.56e-24	cm^3 molecules^-1 s^-1	Group 69	[k32, k86, k87]	12.71
k87	H + C3H4	CH3 + CHCH	-29.95	8.37e-26	cm^3 molecules^-1 s^-1	Group 69	[k32, k86, k87]	0.19
k88	H + C3H5	H2 + C3H4	-203.31	4.08e-23	cm^3 molecules^-1 s^-1	Group 70	[k91, k88, k90, k89]	48.85
k89	H + C3H5	CH2 + CH2CH2	55.96	1.52e-24	cm^3 molecules^-1 s^-1	Group 70	[k91, k88, k90, k89]	1.82
k90	H + C3H5	CH3 + C2H3	55.15	1.80e-23	cm^3 molecules^-1 s^-1	Group 70	[k91, k88, k90, k89]	21.55
k91	H + C3H5	CH4 + CHCH	-233.65	2.32e-23	cm^3 molecules^-1 s^-1	Group 70	[k91, k88, k90, k89]	27.78
k92	H + CH3CH2CH3	CH3 + CH3CH3	-51.83	1.10e-25	cm^3 molecules^-1 s^-1	Group 82	[k93, k92]	7.86
k93	H + CH3CH2CH3	CH4 + C2H5	-68.48	1.29e-24	cm^3 molecules^-1 s^-1	Group 82	[k93, k92]	92.14
k94	C + CH2	H2 + C2	-282.45	2.10e-23	cm^3 molecules^-1 s^-1	Group 5	[k43, k94, k96]	39.29
k95	C + CHCH	H2 + C3	-125.73	1.62e-23	cm^3 molecules^-1 s^-1	Single (order=2)	-	100.00
k96	C + CH2	CH + CH	83.21	6.43e-25	cm^3 molecules^-1 s^-1	Group 5	[k43, k94, k96]	1.20
k97	C + CH3	CH + CH2	122.61	2.64e-25	cm^3 molecules^-1 s^-1	Group 6	[k45, k75, k97]	25.36
k98	OH + R	H + O	425.59	9.37e-06	s^-1	Single (order=1)	-	100.00
k99	H + O	OH	-425.59	2.88e-23	cm^3 molecules^-1 s^-1	Single (order=2)	-	100.00
k100	H2O + R	H + OH	492.2	2.96e-03	s^-1	Group 129	[k106, k100]	99.88
k101	H + OH	H2O	-492.2	5.42e-24	cm^3 molecules^-1 s^-1	Group 118	[k101, k116]	98.24
k102	HO2 + R	H + O2	200.89	1.76e-03	s^-1	Group 135	[k102, k110]	64.28
k103	H + O2	HO2	-200.89	4.82e-23	cm^3 molecules^-1 s^-1	Group 116	[k103, k120]	71.09
k104	H2O2 + R	H + HO2	360.58	1.06e-01	s^-1	Group 130	[k108, k112, k114, k104]	7.36
k105	H + HO2	H2O2	-360.58	4.51e-23	cm^3 molecules^-1 s^-1	Group 112	[k105, k122, k123, k124]	69.55
k106	H2O + R	H2 + O	485.73	3.70e-06	s^-1	Group 129	[k106, k100]	0.12
k107	H2 + O	H2O	-485.73	6.88e-24	cm^3 molecules^-1 s^-1	Group 123	[k107, k117]	83.19
k108	H2O2 + R	H2 + O2	129.41	5.70e-01	s^-1	Group 130	[k108, k112, k114, k104]	39.56
k109	H2 + O2	H2O2	-129.41	4.84e-23	cm^3 molecules^-1 s^-1	Group 124	[k109, k131, k133]	85.62
k110	HO2 + R	O + OH	268.98	9.78e-04	s^-1	Group 135	[k102, k110]	35.72
k111	O + OH	HO2	-268.98	4.90e-23	cm^3 molecules^-1 s^-1	Group 195	[k111, k121]	68.72
k112	H2O2 + R	O + H2O	137.36	5.77e-01	s^-1	Group 130	[k108, k112, k114, k104]	40.04
k113	O + H2O	H2O2	-137.36	4.95e-23	cm^3 molecules^-1 s^-1	Group 186	[k113, k132, k136]	64.90
k114	H2O2 + R	OH + OH	203.97	1.88e-01	s^-1	Group 130	[k108, k112, k114, k104]	13.05
k115	OH + OH	H2O2	-203.97	3.14e-24	cm^3 molecules^-1 s^-1	Group 199	[k115, k134, k137, k125]	13.89
k116	H + OH	H2 + O	-6.47	9.70e-26	cm^3 molecules^-1 s^-1	Group 118	[k101, k116]	1.76
k117	H2 + O	H + OH	6.47	1.39e-24	cm^3 molecules^-1 s^-1	Group 123	[k107, k117]	16.81
k118	H + H2O	H2 + OH	60.14	7.92e-24	cm^3 molecules^-1 s^-1	Single (order=2)	-	100.00
k119	H2 + OH	H + H2O	-60.14	2.95e-23	cm^3 molecules^-1 s^-1	Single (order=2)	-	100.00
k120	H + O2	O + OH	68.09	1.96e-23	cm^3 molecules^-1 s^-1	Group 116	[k103, k120]	28.91
k121	O + OH	H + O2	-68.09	2.23e-23	cm^3 molecules^-1 s^-1	Group 195	[k111, k121]	31.28
k122	H + HO2	H2 + O2	-231.17	1.96e-23	cm^3 molecules^-1 s^-1	Group 112	[k105, k122, k123, k124]	30.23
k123	H + HO2	O + H2O	-223.22	5.51e-26	cm^3 molecules^-1 s^-1	Group 112	[k105, k122, k123, k124]	0.08
k124	H + HO2	OH + OH	-156.61	8.90e-26	cm^3 molecules^-1 s^-1	Group 112	[k105, k122, k123, k124]	0.14
k125	OH + OH	H + HO2	156.61	6.81e-24	cm^3 molecules^-1 s^-1	Group 199	[k115, k134, k137, k125]	30.12
k126	H + H2O2	H2 + HO2	-71.48	1.15e-25	cm^3 molecules^-1 s^-1	Group 106	[k127, k126]	0.39
k127	H + H2O2	OH + H2O	-288.23	2.93e-23	cm^3 molecules^-1 s^-1	Group 106	[k127, k126]	99.61
k128	H + O3	O + HO2	-98.45	1.72e-25	cm^3 molecules^-1 s^-1	Group 117	[k130, k128]	56.58
k129	O + HO2	H + O3	98.45	8.81e-25	cm^3 molecules^-1 s^-1	Group 191	[k138, k129]	10.63
k130	H + O3	OH + O2	-323.15	1.32e-25	cm^3 molecules^-1 s^-1	Group 117	[k130, k128]	43.42
k131	H2 + O2	O + H2O	7.95	4.92e-24	cm^3 molecules^-1 s^-1	Group 124	[k109, k131, k133]	8.70
k132	O + H2O	H2 + O2	-7.95	2.03e-23	cm^3 molecules^-1 s^-1	Group 186	[k113, k132, k136]	26.62
k133	H2 + O2	OH + OH	74.56	3.21e-24	cm^3 molecules^-1 s^-1	Group 124	[k109, k131, k133]	5.68
k134	OH + OH	H2 + O2	-74.56	8.88e-24	cm^3 molecules^-1 s^-1	Group 199	[k115, k134, k137, k125]	39.27
k135	O + H2O2	H2 + O3	26.97	1.32e-24	cm^3 molecules^-1 s^-1	Group 187	[k140, k139, k135]	5.76
k136	O + H2O	OH + OH	66.61	6.47e-24	cm^3 molecules^-1 s^-1	Group 186	[k113, k132, k136]	8.48
k137	OH + OH	O + H2O	-66.61	3.78e-24	cm^3 molecules^-1 s^-1	Group 199	[k115, k134, k137, k125]	16.72
k138	O + HO2	OH + O2	-224.7	7.41e-24	cm^3 molecules^-1 s^-1	Group 191	[k138, k129]	89.37
k139	O + H2O2	OH + HO2	-65.01	2.98e-24	cm^3 molecules^-1 s^-1	Group 187	[k140, k139, k135]	13.01
k140	O + H2O2	H2O + O2	-356.32	1.86e-23	cm^3 molecules^-1 s^-1	Group 187	[k140, k139, k135]	81.22
k141	CO + R	C + O	1072.04	4.32e-04	s^-1	Single (order=1)	[lower threshold for single (order=1)]	100.00
k142	C + O	CO	-1072.04	3.31e-23	cm^3 molecules^-1 s^-1	Single (order=2)	-	100.00
k143	C2O + R	C + CO	220.48	1.00e-02	s^-1	Group 20	[k143, k157]	96.14
k144	C + CO	C2O	-220.48	4.98e-23	cm^3 molecules^-1 s^-1	Single (order=2)	-	100.00
k145	CO2 + R	C + O2	1104.51	5.45e-06	s^-1	Group 60	[k159, k145]	91.32
k146	C + O2	CO2	-1104.51	1.82e-23	cm^3 molecules^-1 s^-1	Group 15	[k146, k183]	96.06
k147	C3O + R	C + C2O	758.12	7.56e-03	s^-1	Group 27	[k171, k161, k147]	0.79
k148	C + C2O	C3O	-758.12	2.10e-23	cm^3 molecules^-1 s^-1	Group 1	[k148, k186, k184]	89.31
k149	C2O2 + R	C + CO2	303.79	7.05e-02	s^-1	Group 21	[k175, k149, k163, k172]	38.66
k150	C + CO2	C2O2	-303.79	3.70e-24	cm^3 molecules^-1 s^-1	Group 7	[k188, k150]	17.29
k151	CO3 + R	C + O3	1015.5	2.11e-01	s^-1	Group 61	[k165, k176, k151]	15.95
k152	C + O3	CO3	-1015.5	3.39e-24	cm^3 molecules^-1 s^-1	Group 16	[k152, k189, k190]	18.06
k153	C3O2 + R	C + C2O2	820.4	7.06e-02	s^-1	Group 28	[k178, k173, k167, k153, k180]	4.10
k154	C + C2O2	C3O2	-820.4	4.24e-23	cm^3 molecules^-1 s^-1	Group 2	[k154, k196, k195, k193, k197]	56.06
k155	C2O3 + R	C + CO3	797.44	5.94e-01	s^-1	Group 22	[k179, k169, k181, k155, k174]	22.25
k156	C + CO3	C2O3	-797.44	2.48e-23	cm^3 molecules^-1 s^-1	Group 8	[k199, k156, k198, k200]	50.12
k157	C2O + R	O + C2	689.72	4.02e-04	s^-1	Group 20	[k143, k157]	3.86
k158	O + C2	C2O	-689.72	2.57e-23	cm^3 molecules^-1 s^-1	Group 139	[k158, k182]	99.56
k159	CO2 + R	O + CO	526.15	5.18e-07	s^-1	Group 60	[k159, k145]	8.68
k160	O + CO	CO2	-526.15	5.13e-23	cm^3 molecules^-1 s^-1	Single (order=2)	-	100.00
k161	C3O + R	O + C3	730.99	5.57e-01	s^-1	Group 27	[k171, k161, k147]	58.29
k162	O + C3	C3O	-730.99	3.63e-23	cm^3 molecules^-1 s^-1	Group 146	[k162, k201, k185]	59.69
k163	C2O2 + R	O + C2O	609.46	1.42e-03	s^-1	Group 21	[k175, k149, k163, k172]	0.78
k164	O + C2O	C2O2	-609.46	1.19e-23	cm^3 molecules^-1 s^-1	Group 143	[k203, k164, k187, k202]	25.62
k165	CO3 + R	O + CO2	13.43	7.14e-01	s^-1	Group 61	[k165, k176, k151]	53.97
k166	O + CO2	CO3	-13.43	1.06e-23	cm^3 molecules^-1 s^-1	Group 180	[k166, k204]	99.40
k167	C3O2 + R	O + C3O	671.74	8.37e-01	s^-1	Group 28	[k178, k173, k167, k153, k180]	48.63
k168	O + C3O	C3O2	-671.74	1.62e-23	cm^3 molecules^-1 s^-1	Group 150	[k168, k207, k206, k194]	99.06
k169	C2O3 + R	O + C2O2	507.08	7.13e-01	s^-1	Group 22	[k179, k169, k181, k155, k174]	26.70
k170	O + C2O2	C2O3	-507.08	1.13e-23	cm^3 molecules^-1 s^-1	Group 144	[k208, k170, k209]	23.06
k171	C3O + R	C2 + CO	375.8	3.91e-01	s^-1	Group 27	[k171, k161, k147]	40.92
k172	C2O2 + R	C2 + O2	805.5	1.43e-03	s^-1	Group 21	[k175, k149, k163, k172]	0.78
k173	C3O2 + R	C2 + CO2	521.39	3.46e-01	s^-1	Group 28	[k178, k173, k167, k153, k180]	20.10
k174	C2O3 + R	C2 + O3	1210.14	1.71e-02	s^-1	Group 22	[k179, k169, k181, k155, k174]	0.64
k175	C2O2 + R	CO + CO	-242.1	1.09e-01	s^-1	Group 21	[k175, k149, k163, k172]	59.78
k176	CO3 + R	CO + O2	45.9	3.98e-01	s^-1	Group 61	[k165, k176, k151]	30.08
k177	CO + O2	CO3	-45.9	4.58e-23	cm^3 molecules^-1 s^-1	Group 59	[k177, k205]	98.43
k178	C3O2 + R	CO + C2O	357.82	4.67e-01	s^-1	Group 28	[k178, k173, k167, k153, k180]	27.13
k179	C2O3 + R	CO + CO2	-261.17	6.82e-01	s^-1	Group 22	[k179, k169, k181, k155, k174]	25.54
k180	C3O2 + R	O2 + C3	909.05	4.83e-04	s^-1	Group 28	[k178, k173, k167, k153, k180]	0.03
k181	C2O3 + R	O2 + C2O	622.86	6.64e-01	s^-1	Group 22	[k179, k169, k181, k155, k174]	24.87
k182	O + C2	C + CO	-469.24	1.13e-25	cm^3 molecules^-1 s^-1	Group 139	[k158, k182]	0.44
k183	C + O2	O + CO	-578.36	7.47e-25	cm^3 molecules^-1 s^-1	Group 15	[k146, k183]	3.94
k184	C + C2O	O + C3	-27.13	1.34e-26	cm^3 molecules^-1 s^-1	Group 1	[k148, k186, k184]	0.06
k185	O + C3	C + C2O	27.13	1.61e-24	cm^3 molecules^-1 s^-1	Group 146	[k162, k201, k185]	2.65
k186	C + C2O	C2 + CO	-382.32	2.50e-24	cm^3 molecules^-1 s^-1	Group 1	[k148, k186, k184]	10.63
k187	O + C2O	C + CO2	-305.67	1.04e-24	cm^3 molecules^-1 s^-1	Group 143	[k203, k164, k187, k202]	2.24
k188	C + CO2	CO + CO	-545.89	1.77e-23	cm^3 molecules^-1 s^-1	Group 7	[k188, k150]	82.71
k189	C + O3	O + CO2	-1002.07	7.72e-24	cm^3 molecules^-1 s^-1	Group 16	[k152, k189, k190]	41.13
k190	C + O3	CO + O2	-969.6	7.66e-24	cm^3 molecules^-1 s^-1	Group 16	[k152, k189, k190]	40.81
k191	C + C3O	C2 + C2O	155.32	2.26e-25	cm^3 molecules^-1 s^-1	Group 4	[k192, k191]	2.42
k192	C + C3O	CO + C3	-341.05	9.11e-24	cm^3 molecules^-1 s^-1	Group 4	[k192, k191]	97.58
k193	C + C2O2	O + C3O	-148.66	1.15e-24	cm^3 molecules^-1 s^-1	Group 2	[k154, k196, k195, k193, k197]	1.52
k194	O + C3O	C + C2O2	148.66	9.21e-26	cm^3 molecules^-1 s^-1	Group 150	[k168, k207, k206, k194]	0.56
k195	C + C2O2	C2 + CO2	-299.01	8.51e-24	cm^3 molecules^-1 s^-1	Group 2	[k154, k196, k195, k193, k197]	11.25
k196	C + C2O2	CO + C2O	-462.58	2.35e-23	cm^3 molecules^-1 s^-1	Group 2	[k154, k196, k195, k193, k197]	31.07
k197	C + C2O2	O2 + C3	88.65	7.40e-26	cm^3 molecules^-1 s^-1	Group 2	[k154, k196, k195, k193, k197]	0.10
k198	C + CO3	O + C2O2	-290.36	7.45e-24	cm^3 molecules^-1 s^-1	Group 8	[k199, k156, k198, k200]	15.06
k199	C + CO3	CO + CO2	-1058.61	1.64e-23	cm^3 molecules^-1 s^-1	Group 8	[k199, k156, k198, k200]	33.15
k200	C + CO3	O2 + C2O	-174.58	8.29e-25	cm^3 molecules^-1 s^-1	Group 8	[k199, k156, k198, k200]	1.68
k201	O + C3	C2 + CO	-355.19	2.29e-23	cm^3 molecules^-1 s^-1	Group 146	[k162, k201, k185]	37.66
k202	O + C2O	C2 + O2	196.04	1.10e-25	cm^3 molecules^-1 s^-1	Group 143	[k203, k164, k187, k202]	0.24
k203	O + C2O	CO + CO	-851.56	3.34e-23	cm^3 molecules^-1 s^-1	Group 143	[k203, k164, k187, k202]	71.91
k204	O + CO2	CO + O2	32.47	6.38e-26	cm^3 molecules^-1 s^-1	Group 180	[k166, k204]	0.60
k205	CO + O2	O + CO2	-32.47	7.32e-25	cm^3 molecules^-1 s^-1	Group 59	[k177, k205]	1.57
k206	O + C3O	C2 + CO2	-150.35	2.10e-26	cm^3 molecules^-1 s^-1	Group 150	[k168, k207, k206, k194]	0.13
k207	O + C3O	CO + C2O	-313.92	4.09e-26	cm^3 molecules^-1 s^-1	Group 150	[k168, k207, k206, k194]	0.25
k208	O + C2O2	CO + CO2	-768.25	3.76e-23	cm^3 molecules^-1 s^-1	Group 144	[k208, k170, k209]	76.73
k209	O + C2O2	O2 + C2O	115.78	9.99e-26	cm^3 molecules^-1 s^-1	Group 144	[k208, k170, k209]	0.20
k210	O + CO3	CO + O3	-56.54	9.39e-25	cm^3 molecules^-1 s^-1	Group 181	[k211, k210]	8.88
k211	O + CO3	O2 + CO2	-480.25	9.63e-24	cm^3 molecules^-1 s^-1	Group 181	[k211, k210]	91.12
k212	O + C3O2	CO + C2O2	-251.64	3.76e-25	cm^3 molecules^-1 s^-1	Group 151	[k212, k214, k213]	67.53
k213	O + C3O2	O2 + C3O	178.06	8.49e-26	cm^3 molecules^-1 s^-1	Group 151	[k212, k214, k213]	15.25
k214	O + C3O2	C2O + CO2	-168.33	9.59e-26	cm^3 molecules^-1 s^-1	Group 151	[k212, k214, k213]	17.22
k215	O + C2O3	CO + CO3	-274.6	1.35e-23	cm^3 molecules^-1 s^-1	Group 145	[k217, k215, k216]	20.33
k216	O + C2O3	O2 + C2O2	13.4	9.56e-26	cm^3 molecules^-1 s^-1	Group 145	[k217, k215, k216]	0.14
k217	O + C2O3	CO2 + CO2	-787.32	5.28e-23	cm^3 molecules^-1 s^-1	Group 145	[k217, k215, k216]	79.52
k218	HCO + R	H + CO	60.85	1.26e-03	s^-1	Single (order=1)	-	100.00
k219	H + CO	HCO	-60.85	5.96e-24	cm^3 molecules^-1 s^-1	Single (order=2)	-	100.00
k220	H2CO + R	H + HCO	362.79	2.36e-02	s^-1	Group 126	[k264, k220]	53.76
k221	H + HCO	H2CO	-362.79	1.36e-25	cm^3 molecules^-1 s^-1	Group 108	[k718, k221]	0.96
k222	CH2OH + R	H + H2CO	121.02	4.60e-01	s^-1	Group 35	[k265, k222, k341, k418, k369]	37.36
k223	H + H2CO	CH2OH	-121.02	5.03e-23	cm^3 molecules^-1 s^-1	Group 103	[k223, k225, k719]	65.33
k224	CH3O + R	H + H2CO	81.73	6.60e-01	s^-1	Group 50	[k266, k224, k342, k420, k370]	42.02
k225	H + H2CO	CH3O	-81.73	2.40e-23	cm^3 molecules^-1 s^-1	Group 103	[k223, k225, k719]	31.17
k226	H2CCO + R	H + C2OH	438.45	8.27e-01	s^-1	Group 125	[k372, k267, k226, k445, k591, k312, k344]	48.48
k227	H + C2OH	H2CCO	-438.45	1.55e-23	cm^3 molecules^-1 s^-1	Group 67	[k227, k229, k735, k733, k736, k738]	8.39
k228	HCCOH + R	H + C2OH	297.8	8.29e-01	s^-1	Group 131	[k373, k268, k228, k447, k592, k314, k345]	30.66
k229	H + C2OH	HCCOH	-297.8	4.59e-23	cm^3 molecules^-1 s^-1	Group 67	[k227, k229, k735, k733, k736, k738]	24.85
k230	HOCO + R	H + CO2	4.1	1.71e-02	s^-1	Group 138	[k230, k568, k455, k352, k319]	95.32
k231	H + CO2	HOCO	-4.1	6.95e-24	cm^3 molecules^-1 s^-1	Group 100	[k231, k753]	98.93
k232	CH2OO + R	H + HOCO	25.44	3.10e-01	s^-1	Group 37	[k275, k596, k232, k570, k459, k379, k321, k354]	11.29
k233	H + HOCO	CH2OO	-25.44	1.41e-23	cm^3 molecules^-1 s^-1	Group 115	[k763, k235, k768, k233, k767, k237, k765]	17.11
k234	HCOOH + R	H + HOCO	405.9	2.67e-05	s^-1	Group 134	[k276, k597, k234, k571, k461, k380, k323, k355]	38.46
k235	H + HOCO	HCOOH	-405.9	2.99e-23	cm^3 molecules^-1 s^-1	Group 115	[k763, k235, k768, k233, k767, k237, k765]	36.29
k236	H2CO2 + R	H + HOCO	-77.1	4.12e-01	s^-1	Group 127	[k277, k598, k236, k572, k463, k381, k325, k356]	9.63
k237	H + HOCO	H2CO2	77.1	1.04e-26	cm^3 molecules^-1 s^-1	Group 115	[k763, k235, k768, k233, k767, k237, k765]	0.01
k238	CH3CH2OH + R	H + HOCHCH3	390.49	1.70e-01	s^-1	Group 43	[k599, k533, k282, k278, k280, k427, k573, k238, k465, k429, k382]	6.16
k239	H + HOCHCH3	CH3CH2OH	-390.49	3.68e-23	cm^3 molecules^-1 s^-1	Group 114	[k239, k779, k777, k241, k771, k769, k770, k773, k778, k775, k774, k772]	13.70
k240	CH3OCH3 + R	H + HOCHCH3	339.68	8.19e-01	s^-1	Group 52	[k600, k534, k283, k279, k281, k428, k574, k240, k467, k430, k383]	21.28
k241	H + HOCHCH3	CH3OCH3	-339.68	1.49e-23	cm^3 molecules^-1 s^-1	Group 114	[k239, k779, k777, k241, k771, k769, k770, k773, k778, k775, k774, k772]	5.55
k242	CH3COCH3 + R	H + CH3COCH2	397.53	6.98e-01	s^-1	Group 48	[k640, k538, k604, k653, k539, k623, k666, k242, k580, k388, k386, k631, k632, k387, k330, k331, k361]	8.12
k243	H + CH3COCH2	CH3COCH3	-397.53	1.40e-23	cm^3 molecules^-1 s^-1	Group 89	[k243, k840, k833, k836, k841, k834, k837, k842, k835, k832, k830, k838, k839, k831]	3.64
k244	HCO3 + R	H + CO3	775.63	1.62e-01	s^-1	Group 132	[k583, k647, k667, k244, k503, k365]	8.87
k245	H + CO3	HCO3	-775.63	1.51e-23	cm^3 molecules^-1 s^-1	Group 101	[k245, k853, k854, k855, k851]	13.39
k246	CH3OCHOH + R	H + CH3COOH	-58.41	5.10e-01	s^-1	Group 53	[k547, k291, k442, k246, k668, k248, k586, k679, k250, k680, k584, k252, k585, k659, k673, k441, k638, k505, k366, k443, k367]	4.15
k247	H + CH3COOH	CH3OCHOH	58.41	3.75e-23	cm^3 molecules^-1 s^-1	Group 91	[k865, k862, k863, k869, k247, k856, k868, k870, k858, k871, k866, k860, k867]	10.73
k248	CH3OCHOH + R	H + HCOOCH3	13.18	6.40e-01	s^-1	Group 53	[k547, k291, k442, k246, k668, k248, k586, k679, k250, k680, k584, k252, k585, k659, k673, k441, k638, k505, k366, k443, k367]	5.21
k249	H + HCOOCH3	CH3OCHOH	-13.18	4.40e-23	cm^3 molecules^-1 s^-1	Group 110	[k879, k876, k877, k857, k883, k249, k882, k884, k872, k885, k880, k874, k881]	12.60
k250	CH3OCHOH + R	H + OHCH2CHO	55.65	8.44e-01	s^-1	Group 53	[k547, k291, k442, k246, k668, k248, k586, k679, k250, k680, k584, k252, k585, k659, k673, k441, k638, k505, k366, k443, k367]	6.87
k251	H + OHCH2CHO	CH3OCHOH	-55.65	2.29e-23	cm^3 molecules^-1 s^-1	Group 120	[k891, k888, k889, k859, k896, k251, k873, k894, k897, k898, k892, k886, k893, k895]	5.54
k252	CH3OCHOH + R	H + OHCHCHOH	87.31	5.50e-01	s^-1	Group 53	[k547, k291, k442, k246, k668, k248, k586, k679, k250, k680, k584, k252, k585, k659, k673, k441, k638, k505, k366, k443, k367]	4.48
k253	H + OHCHCHOH	CH3OCHOH	-87.31	4.60e-23	cm^3 molecules^-1 s^-1	Group 121	[k902, k899, k900, k861, k907, k253, k875, k905, k909, k887, k910, k903, k904, k906, k908]	10.32
k254	H2CO3 + R	H + HCO3	99.05	6.10e-01	s^-1	Group 128	[k605, k254, k648, k292, k681, k669, k404]	18.62
k255	H + HCO3	H2CO3	-99.05	1.09e-25	cm^3 molecules^-1 s^-1	Group 109	[k917, k255]	51.17
k256	CH3CHOHOH + R	H + CH3OCHOH	424.63	1.14e-01	s^-1	Group 46	[k552, k293, k614, k606, k297, k301, k682, k610, k305, k660, k689, k548, k696, k587, k405, k700, k507, k556, k705, k256, k515, k674, k409]	1.43
k257	H + CH3OCHOH	CH3CHOHOH	-424.63	2.04e-23	cm^3 molecules^-1 s^-1	Group 96	[k928, k918, k933, k263, k257, k931, k919, k920, k259, k936, k932, k921, k261, k934, k937, k927, k938, k930, k922, k939, k923, k929, k940, k925, k935]	2.79
k258	CH3OCH2OH + R	H + CH3OCHOH	370.17	2.81e-01	s^-1	Group 51	[k553, k294, k615, k607, k298, k302, k683, k611, k306, k661, k690, k549, k697, k588, k406, k701, k509, k557, k706, k258, k517, k675, k410]	2.53
k259	H + CH3OCHOH	CH3OCH2OH	-370.17	4.49e-23	cm^3 molecules^-1 s^-1	Group 96	[k928, k918, k933, k263, k257, k931, k919, k920, k259, k936, k932, k921, k261, k934, k937, k927, k938, k930, k922, k939, k923, k929, k940, k925, k935]	6.13
k260	CH3OOCH3 + R	H + CH3OCHOH	146.96	8.28e-01	s^-1	Group 55	[k554, k295, k616, k608, k299, k303, k684, k612, k307, k662, k691, k550, k698, k589, k407, k702, k511, k558, k707, k260, k519, k676, k411]	6.56
k261	H + CH3OCHOH	CH3OOCH3	-146.96	1.87e-23	cm^3 molecules^-1 s^-1	Group 96	[k928, k918, k933, k263, k257, k931, k919, k920, k259, k936, k932, k921, k261, k934, k937, k927, k938, k930, k922, k939, k923, k929, k940, k925, k935]	2.55
k262	HOCH2CH2OH + R	H + CH3OCHOH	441.6	3.77e-01	s^-1	Group 136	[k555, k296, k617, k609, k300, k304, k685, k613, k308, k663, k692, k551, k699, k590, k408, k703, k513, k559, k708, k262, k521, k677, k412]	3.25
k263	H + CH3OCHOH	HOCH2CH2OH	-441.6	5.11e-23	cm^3 molecules^-1 s^-1	Group 96	[k928, k918, k933, k263, k257, k931, k919, k920, k259, k936, k932, k921, k261, k934, k937, k927, k938, k930, k922, k939, k923, k929, k940, k925, k935]	6.98
k264	H2CO + R	H2 + CO	-8.42	2.03e-02	s^-1	Group 126	[k264, k220]	46.24
k265	CH2OH + R	H2 + HCO	51.75	4.81e-01	s^-1	Group 35	[k265, k222, k341, k418, k369]	39.06
k266	CH3O + R	H2 + HCO	12.46	4.88e-01	s^-1	Group 50	[k266, k224, k342, k420, k370]	31.07
k267	H2CCO + R	H2 + C2O	422.48	2.98e-01	s^-1	Group 125	[k372, k267, k226, k445, k591, k312, k344]	17.47
k268	HCCOH + R	H2 + C2O	281.83	3.18e-01	s^-1	Group 131	[k373, k268, k228, k447, k592, k314, k345]	11.76
k269	CH2CHOH + R	H2 + H2CCO	68.02	5.23e-01	s^-1	Group 33	[k529, k269, k593, k272, k423, k374, k449, k565, k316, k346, k349]	11.00
k270	CH2OCH2 + R	H2 + H2CCO	-5.39	2.70e-01	s^-1	Group 34	[k530, k270, k594, k273, k424, k375, k451, k566, k317, k347, k350]	5.81
k271	CH3CHO + R	H2 + H2CCO	109.67	3.97e-01	s^-1	Group 45	[k531, k271, k595, k274, k425, k376, k453, k567, k318, k348, k351]	9.29
k272	CH2CHOH + R	H2 + HCCOH	208.67	4.02e-01	s^-1	Group 33	[k529, k269, k593, k272, k423, k374, k449, k565, k316, k346, k349]	8.46
k273	CH2OCH2 + R	H2 + HCCOH	135.26	7.03e-01	s^-1	Group 34	[k530, k270, k594, k273, k424, k375, k451, k566, k317, k347, k350]	15.14
k274	CH3CHO + R	H2 + HCCOH	250.32	4.85e-01	s^-1	Group 45	[k531, k271, k595, k274, k425, k376, k453, k567, k318, k348, k351]	11.35
k275	CH2OO + R	H2 + CO2	-402.52	8.01e-01	s^-1	Group 37	[k275, k596, k232, k570, k459, k379, k321, k354]	29.18
k276	HCOOH + R	H2 + CO2	-22.06	1.01e-08	s^-1	Group 134	[k276, k597, k234, k571, k461, k380, k323, k355]	0.01
k277	H2CO2 + R	H2 + CO2	-505.06	7.47e-01	s^-1	Group 127	[k277, k598, k236, k572, k463, k381, k325, k356]	17.45
k278	CH3CH2OH + R	H2 + CH2CHOH	103.94	2.80e-01	s^-1	Group 43	[k599, k533, k282, k278, k280, k427, k573, k238, k465, k429, k382]	10.14
k279	CH3OCH3 + R	H2 + CH2CHOH	53.13	4.91e-01	s^-1	Group 52	[k600, k534, k283, k279, k281, k428, k574, k240, k467, k430, k383]	12.76
k280	CH3CH2OH + R	H2 + CH2OCH2	177.35	1.13e-01	s^-1	Group 43	[k599, k533, k282, k278, k280, k427, k573, k238, k465, k429, k382]	4.09
k281	CH3OCH3 + R	H2 + CH2OCH2	126.54	3.30e-01	s^-1	Group 52	[k600, k534, k283, k279, k281, k428, k574, k240, k467, k430, k383]	8.57
k282	CH3CH2OH + R	H2 + CH3CHO	62.29	8.03e-01	s^-1	Group 43	[k599, k533, k282, k278, k280, k427, k573, k238, k465, k429, k382]	29.07
k283	CH3OCH3 + R	H2 + CH3CHO	11.48	3.14e-01	s^-1	Group 52	[k600, k534, k283, k279, k281, k428, k574, k240, k467, k430, k383]	8.16
k284	CH2OHOH + R	H2 + CH2OO	388.57	3.17e-01	s^-1	Group 36	[k286, k601, k535, k284, k575, k469, k577, k288, k431, k384]	8.01
k285	CH3OOH + R	H2 + CH2OO	124.28	8.30e-01	s^-1	Group 56	[k287, k602, k536, k285, k576, k471, k578, k289, k432, k385]	15.48
k286	CH2OHOH + R	H2 + HCOOH	8.11	1.21e-01	s^-1	Group 36	[k286, k601, k535, k284, k575, k469, k577, k288, k431, k384]	3.06
k287	CH3OOH + R	H2 + HCOOH	-256.18	8.01e-01	s^-1	Group 56	[k287, k602, k536, k285, k576, k471, k578, k289, k432, k385]	14.94
k288	CH2OHOH + R	H2 + H2CO2	491.11	4.74e-01	s^-1	Group 36	[k286, k601, k535, k284, k575, k469, k577, k288, k431, k384]	11.98
k289	CH3OOH + R	H2 + H2CO2	226.82	3.92e-01	s^-1	Group 56	[k287, k602, k536, k285, k576, k471, k578, k289, k432, k385]	7.31
k290	CH3CH2CH2OH + R	H2 + CH3COCH3	31.27	6.09e-01	s^-1	Group 40	[k546, k290, k544, k678, k658, k545, k440, k671, k672, k402, k403]	15.68
k291	CH3OCHOH + R	H2 + C2H3O2	-82.61	4.84e-01	s^-1	Group 53	[k547, k291, k442, k246, k668, k248, k586, k679, k250, k680, k584, k252, k585, k659, k673, k441, k638, k505, k366, k443, k367]	3.94
k292	H2CO3 + R	H2 + CO3	442.62	8.00e-01	s^-1	Group 128	[k605, k254, k648, k292, k681, k669, k404]	24.41
k293	CH3CHOHOH + R	H2 + CH3COOH	-65.84	8.00e-01	s^-1	Group 46	[k552, k293, k614, k606, k297, k301, k682, k610, k305, k660, k689, k548, k696, k587, k405, k700, k507, k556, k705, k256, k515, k674, k409]	10.06
k294	CH3OCH2OH + R	H2 + CH3COOH	-120.3	6.68e-01	s^-1	Group 51	[k553, k294, k615, k607, k298, k302, k683, k611, k306, k661, k690, k549, k697, k588, k406, k701, k509, k557, k706, k258, k517, k675, k410]	6.01
k295	CH3OOCH3 + R	H2 + CH3COOH	-343.51	4.27e-01	s^-1	Group 55	[k554, k295, k616, k608, k299, k303, k684, k612, k307, k662, k691, k550, k698, k589, k407, k702, k511, k558, k707, k260, k519, k676, k411]	3.38
k296	HOCH2CH2OH + R	H2 + CH3COOH	-48.87	3.05e-01	s^-1	Group 136	[k555, k296, k617, k609, k300, k304, k685, k613, k308, k663, k692, k551, k699, k590, k408, k703, k513, k559, k708, k262, k521, k677, k412]	2.63
k297	CH3CHOHOH + R	H2 + HCOOCH3	5.75	7.11e-01	s^-1	Group 46	[k552, k293, k614, k606, k297, k301, k682, k610, k305, k660, k689, k548, k696, k587, k405, k700, k507, k556, k705, k256, k515, k674, k409]	8.94
k298	CH3OCH2OH + R	H2 + HCOOCH3	-48.71	6.22e-01	s^-1	Group 51	[k553, k294, k615, k607, k298, k302, k683, k611, k306, k661, k690, k549, k697, k588, k406, k701, k509, k557, k706, k258, k517, k675, k410]	5.60
k299	CH3OOCH3 + R	H2 + HCOOCH3	-271.92	4.88e-01	s^-1	Group 55	[k554, k295, k616, k608, k299, k303, k684, k612, k307, k662, k691, k550, k698, k589, k407, k702, k511, k558, k707, k260, k519, k676, k411]	3.87
k300	HOCH2CH2OH + R	H2 + HCOOCH3	22.72	4.66e-01	s^-1	Group 136	[k555, k296, k617, k609, k300, k304, k685, k613, k308, k663, k692, k551, k699, k590, k408, k703, k513, k559, k708, k262, k521, k677, k412]	4.02
k301	CH3CHOHOH + R	H2 + OHCH2CHO	48.22	1.39e-01	s^-1	Group 46	[k552, k293, k614, k606, k297, k301, k682, k610, k305, k660, k689, k548, k696, k587, k405, k700, k507, k556, k705, k256, k515, k674, k409]	1.75
k302	CH3OCH2OH + R	H2 + OHCH2CHO	-6.24	7.11e-01	s^-1	Group 51	[k553, k294, k615, k607, k298, k302, k683, k611, k306, k661, k690, k549, k697, k588, k406, k701, k509, k557, k706, k258, k517, k675, k410]	6.40
k303	CH3OOCH3 + R	H2 + OHCH2CHO	-229.45	2.99e-01	s^-1	Group 55	[k554, k295, k616, k608, k299, k303, k684, k612, k307, k662, k691, k550, k698, k589, k407, k702, k511, k558, k707, k260, k519, k676, k411]	2.37
k304	HOCH2CH2OH + R	H2 + OHCH2CHO	65.19	3.00e-01	s^-1	Group 136	[k555, k296, k617, k609, k300, k304, k685, k613, k308, k663, k692, k551, k699, k590, k408, k703, k513, k559, k708, k262, k521, k677, k412]	2.59
k305	CH3CHOHOH + R	H2 + OHCHCHOH	79.88	1.59e-01	s^-1	Group 46	[k552, k293, k614, k606, k297, k301, k682, k610, k305, k660, k689, k548, k696, k587, k405, k700, k507, k556, k705, k256, k515, k674, k409]	2.00
k306	CH3OCH2OH + R	H2 + OHCHCHOH	25.42	7.74e-01	s^-1	Group 51	[k553, k294, k615, k607, k298, k302, k683, k611, k306, k661, k690, k549, k697, k588, k406, k701, k509, k557, k706, k258, k517, k675, k410]	6.97
k307	CH3OOCH3 + R	H2 + OHCHCHOH	-197.79	7.12e-01	s^-1	Group 55	[k554, k295, k616, k608, k299, k303, k684, k612, k307, k662, k691, k550, k698, k589, k407, k702, k511, k558, k707, k260, k519, k676, k411]	5.64
k308	HOCH2CH2OH + R	H2 + OHCHCHOH	96.85	7.79e-01	s^-1	Group 136	[k555, k296, k617, k609, k300, k304, k685, k613, k308, k663, k692, k551, k699, k590, k408, k703, k513, k559, k708, k262, k521, k677, k412]	6.72
k309	OHCCOOH + R	H2 + C2O3	171.26	3.28e-01	s^-1	Group 200	[k686, k650, k309, k618, k670, k368, k649, k710, k651, k711, k340, k716, k413, k717, k629]	4.84
k310	C2OH + R	C + HCO	575.72	2.82e-01	s^-1	Group 23	[k343, k310, k564]	51.43
k311	C + HCO	C2OH	-575.72	2.38e-23	cm^3 molecules^-1 s^-1	Group 12	[k311, k1054, k1055]	44.69
k312	H2CCO + R	C + H2CO	651.38	1.96e-02	s^-1	Group 125	[k372, k267, k226, k445, k591, k312, k344]	1.15
k313	C + H2CO	H2CCO	-651.38	3.12e-23	cm^3 molecules^-1 s^-1	Group 9	[k313, k315, k1057, k1017, k734, k1058, k1060, k1056]	10.96
k314	HCCOH + R	C + H2CO	510.73	4.36e-04	s^-1	Group 131	[k373, k268, k228, k447, k592, k314, k345]	0.02
k315	C + H2CO	HCCOH	-510.73	5.00e-23	cm^3 molecules^-1 s^-1	Group 9	[k313, k315, k1057, k1017, k734, k1058, k1060, k1056]	17.56
k316	CH2CHOH + R	C + CH3OH	634.74	5.44e-01	s^-1	Group 33	[k529, k269, k593, k272, k423, k374, k449, k565, k316, k346, k349]	11.45
k317	CH2OCH2 + R	C + CH3OH	561.33	5.48e-01	s^-1	Group 34	[k530, k270, k594, k273, k424, k375, k451, k566, k317, k347, k350]	11.80
k318	CH3CHO + R	C + CH3OH	676.39	4.06e-01	s^-1	Group 45	[k531, k271, k595, k274, k425, k376, k453, k567, k318, k348, k351]	9.50
k319	HOCO + R	C + HO2	907.72	6.44e-06	s^-1	Group 138	[k230, k568, k455, k352, k319]	0.04
k320	C + HO2	HOCO	-907.72	2.68e-23	cm^3 molecules^-1 s^-1	Group 13	[k320, k751, k1065, k1064, k1063]	19.87
k321	CH2OO + R	C + H2O2	572.58	3.96e-01	s^-1	Group 37	[k275, k596, k232, k570, k459, k379, k321, k354]	14.43
k322	C + H2O2	CH2OO	-572.58	2.24e-23	cm^3 molecules^-1 s^-1	Group 11	[k1022, k324, k1070, k322, k764, k1069, k326, k1068, k1067, k1066]	10.81
k323	HCOOH + R	C + H2O2	953.04	5.16e-07	s^-1	Group 134	[k276, k597, k234, k571, k461, k380, k323, k355]	0.74
k324	C + H2O2	HCOOH	-953.04	2.34e-23	cm^3 molecules^-1 s^-1	Group 11	[k1022, k324, k1070, k322, k764, k1069, k326, k1068, k1067, k1066]	11.29
k325	H2CO2 + R	C + H2O2	470.04	7.82e-01	s^-1	Group 127	[k277, k598, k236, k572, k463, k381, k325, k356]	18.27
k326	C + H2O2	H2CO2	-470.04	1.87e-23	cm^3 molecules^-1 s^-1	Group 11	[k1022, k324, k1070, k322, k764, k1069, k326, k1068, k1067, k1066]	9.03
k327	C3OH + R	C + C2OH	598.16	2.45e-03	s^-1	Group 29	[k620, k327, k357]	11.46
k328	C + C2OH	C3OH	-598.16	1.86e-23	cm^3 molecules^-1 s^-1	Group 3	[k328, k1072, k1071]	30.23
k329	CH3COCH2 + R	C + HOCHCH3	687.03	5.02e-04	s^-1	Group 47	[k639, k652, k433, k537, k603, k630, k621, k579, k434, k622, k473, k360, k358, k359, k329]	0.01
k330	CH3COCH3 + R	C + CH3CH2OH	694.07	1.10e-01	s^-1	Group 48	[k640, k538, k604, k653, k539, k623, k666, k242, k580, k388, k386, k631, k632, k387, k330, k331, k361]	1.28
k331	CH3COCH3 + R	C + CH3OCH3	744.88	1.96e-01	s^-1	Group 48	[k640, k538, k604, k653, k539, k623, k666, k242, k580, k388, k386, k631, k632, k387, k330, k331, k361]	2.28
k332	CH3COOH + R	C + CH2OHOH	750.77	2.64e-03	s^-1	Group 49	[k540, k643, k436, k394, k654, k491, k625, k475, k483, k634, k332, k390, k398, k336]	0.05
k333	HCOOCH3 + R	C + CH2OHOH	679.18	4.62e-01	s^-1	Group 133	[k541, k644, k437, k395, k655, k493, k626, k477, k485, k635, k333, k391, k399, k337]	8.42
k334	OHCH2CHO + R	C + CH2OHOH	636.71	5.74e-01	s^-1	Group 201	[k542, k645, k438, k396, k656, k495, k627, k479, k487, k636, k334, k392, k400, k338]	7.67
k335	OHCHCHOH + R	C + CH2OHOH	605.05	7.52e-01	s^-1	Group 202	[k543, k646, k439, k397, k657, k497, k628, k481, k489, k637, k335, k393, k401, k339]	9.24
k336	CH3COOH + R	C + CH3OOH	1015.06	1.81e-02	s^-1	Group 49	[k540, k643, k436, k394, k654, k491, k625, k475, k483, k634, k332, k390, k398, k336]	0.37
k337	HCOOCH3 + R	C + CH3OOH	943.47	8.51e-02	s^-1	Group 133	[k541, k644, k437, k395, k655, k493, k626, k477, k485, k635, k333, k391, k399, k337]	1.55
k338	OHCH2CHO + R	C + CH3OOH	901.0	2.04e-03	s^-1	Group 201	[k542, k645, k438, k396, k656, k495, k627, k479, k487, k636, k334, k392, k400, k338]	0.03
k339	OHCHCHOH + R	C + CH3OOH	869.34	3.74e-04	s^-1	Group 202	[k543, k646, k439, k397, k657, k497, k628, k481, k489, k637, k335, k393, k401, k339]	0.00
k340	OHCCOOH + R	C + H2CO3	526.08	8.45e-01	s^-1	Group 200	[k686, k650, k309, k618, k670, k368, k649, k710, k651, k711, k340, k716, k413, k717, k629]	12.48
k341	CH2OH + R	CH + H2O	364.31	2.89e-01	s^-1	Group 35	[k265, k222, k341, k418, k369]	23.47
k342	CH3O + R	CH + H2O	325.02	4.13e-01	s^-1	Group 50	[k266, k224, k342, k420, k370]	26.29
k343	C2OH + R	CH + CO	301.97	2.65e-01	s^-1	Group 23	[k343, k310, k564]	48.33
k344	H2CCO + R	CH + HCO	679.57	1.98e-03	s^-1	Group 125	[k372, k267, k226, k445, k591, k312, k344]	0.12
k345	HCCOH + R	CH + HCO	538.92	2.34e-03	s^-1	Group 131	[k373, k268, k228, k447, k592, k314, k345]	0.09
k346	CH2CHOH + R	CH + CH2OH	695.84	2.86e-01	s^-1	Group 33	[k529, k269, k593, k272, k423, k374, k449, k565, k316, k346, k349]	6.02
k347	CH2OCH2 + R	CH + CH2OH	622.43	1.56e-01	s^-1	Group 34	[k530, k270, k594, k273, k424, k375, k451, k566, k317, k347, k350]	3.36
k348	CH3CHO + R	CH + CH2OH	737.49	8.32e-02	s^-1	Group 45	[k531, k271, k595, k274, k425, k376, k453, k567, k318, k348, k351]	1.95
k349	CH2CHOH + R	CH + CH3O	735.13	3.14e-03	s^-1	Group 33	[k529, k269, k593, k272, k423, k374, k449, k565, k316, k346, k349]	0.07
k350	CH2OCH2 + R	CH + CH3O	661.72	1.53e-03	s^-1	Group 34	[k530, k270, k594, k273, k424, k375, k451, k566, k317, k347, k350]	0.03
k351	CH3CHO + R	CH + CH3O	776.78	3.66e-03	s^-1	Group 45	[k531, k271, k595, k274, k425, k376, k453, k567, k318, k348, k351]	0.09
k352	HOCO + R	CH + O2	774.01	4.63e-04	s^-1	Group 138	[k230, k568, k455, k352, k319]	2.58
k353	HOCHCH3 + R	CH + CH3OH	445.65	1.04e-03	s^-1	Group 137	[k532, k426, k569, k457, k377, k353, k378]	0.29
k354	CH2OO + R	CH + HO2	598.56	8.32e-04	s^-1	Group 37	[k275, k596, k232, k570, k459, k379, k321, k354]	0.03
k355	HCOOH + R	CH + HO2	979.02	1.07e-06	s^-1	Group 134	[k276, k597, k234, k571, k461, k380, k323, k355]	1.54
k356	H2CO2 + R	CH + HO2	496.02	1.36e-02	s^-1	Group 127	[k277, k598, k236, k572, k463, k381, k325, k356]	0.32
k357	C3OH + R	CH + C2O	679.65	1.03e-02	s^-1	Group 29	[k620, k327, k357]	48.18
k358	CH3COCH2 + R	CH + CH2CHOH	497.94	7.53e-01	s^-1	Group 47	[k639, k652, k433, k537, k603, k630, k621, k579, k434, k622, k473, k360, k358, k359, k329]	12.24
k359	CH3COCH2 + R	CH + CH2OCH2	571.35	8.22e-02	s^-1	Group 47	[k639, k652, k433, k537, k603, k630, k621, k579, k434, k622, k473, k360, k358, k359, k329]	1.34
k360	CH3COCH2 + R	CH + CH3CHO	456.29	5.38e-01	s^-1	Group 47	[k639, k652, k433, k537, k603, k630, k621, k579, k434, k622, k473, k360, k358, k359, k329]	8.75
k361	CH3COCH3 + R	CH + HOCHCH3	749.96	1.01e-02	s^-1	Group 48	[k640, k538, k604, k653, k539, k623, k666, k242, k580, k388, k386, k631, k632, k387, k330, k331, k361]	0.12
k362	C2H3O2 + R	CH + CH2OO	828.94	3.11e-01	s^-1	Group 18	[k435, k641, k642, k581, k582, k389, k363, k624, k633, k362, k364]	5.36
k363	C2H3O2 + R	CH + HCOOH	448.48	8.45e-01	s^-1	Group 18	[k435, k641, k642, k581, k582, k389, k363, k624, k633, k362, k364]	14.56
k364	C2H3O2 + R	CH + H2CO2	931.48	2.79e-02	s^-1	Group 18	[k435, k641, k642, k581, k582, k389, k363, k624, k633, k362, k364]	0.48
k365	HCO3 + R	CH + O3	1456.53	8.38e-02	s^-1	Group 132	[k583, k647, k667, k244, k503, k365]	4.59
k366	CH3OCHOH + R	CH + CH2OHOH	357.76	7.08e-01	s^-1	Group 53	[k547, k291, k442, k246, k668, k248, k586, k679, k250, k680, k584, k252, k585, k659, k673, k441, k638, k505, k366, k443, k367]	5.77
k367	CH3OCHOH + R	CH + CH3OOH	622.05	6.50e-01	s^-1	Group 53	[k547, k291, k442, k246, k668, k248, k586, k679, k250, k680, k584, k252, k585, k659, k673, k441, k638, k505, k366, k443, k367]	5.29
k368	OHCCOOH + R	CH + HCO3	290.53	3.58e-01	s^-1	Group 200	[k686, k650, k309, k618, k670, k368, k649, k710, k651, k711, k340, k716, k413, k717, k629]	5.29
k369	CH2OH + R	CH2 + OH	438.7	3.57e-04	s^-1	Group 35	[k265, k222, k341, k418, k369]	0.03
k370	CH3O + R	CH2 + OH	399.41	8.75e-03	s^-1	Group 50	[k266, k224, k342, k420, k370]	0.56
k371	CH3OH + R	CH2 + H2O	342.2	1.94e-01	s^-1	Group 54	[k371, k422]	93.05
k372	H2CCO + R	CH2 + CO	322.61	3.41e-01	s^-1	Group 125	[k372, k267, k226, k445, k591, k312, k344]	19.99
k373	HCCOH + R	CH2 + CO	181.96	5.79e-01	s^-1	Group 131	[k373, k268, k228, k447, k592, k314, k345]	21.41
k374	CH2CHOH + R	CH2 + H2CO	399.05	6.07e-01	s^-1	Group 33	[k529, k269, k593, k272, k423, k374, k449, k565, k316, k346, k349]	12.77
k375	CH2OCH2 + R	CH2 + H2CO	325.64	3.76e-01	s^-1	Group 34	[k530, k270, k594, k273, k424, k375, k451, k566, k317, k347, k350]	8.10
k376	CH3CHO + R	CH2 + H2CO	440.7	5.85e-01	s^-1	Group 45	[k531, k271, k595, k274, k425, k376, k453, k567, k318, k348, k351]	13.69
k377	HOCHCH3 + R	CH2 + CH2OH	423.54	2.52e-03	s^-1	Group 137	[k532, k426, k569, k457, k377, k353, k378]	0.69
k378	HOCHCH3 + R	CH2 + CH3O	462.83	1.29e-03	s^-1	Group 137	[k532, k426, k569, k457, k377, k353, k378]	0.35
k379	CH2OO + R	CH2 + O2	381.64	4.69e-01	s^-1	Group 37	[k275, k596, k232, k570, k459, k379, k321, k354]	17.09
k380	HCOOH + R	CH2 + O2	762.1	6.91e-06	s^-1	Group 134	[k276, k597, k234, k571, k461, k380, k323, k355]	9.95
k381	H2CO2 + R	CH2 + O2	279.1	6.11e-01	s^-1	Group 127	[k277, k598, k236, k572, k463, k381, k325, k356]	14.28
k382	CH3CH2OH + R	CH2 + CH3OH	418.33	3.84e-03	s^-1	Group 43	[k599, k533, k282, k278, k280, k427, k573, k238, k465, k429, k382]	0.14
k383	CH3OCH3 + R	CH2 + CH3OH	367.52	2.06e-02	s^-1	Group 52	[k600, k534, k283, k279, k281, k428, k574, k240, k467, k430, k383]	0.54
k384	CH2OHOH + R	CH2 + H2O2	640.8	1.35e-02	s^-1	Group 36	[k286, k601, k535, k284, k575, k469, k577, k288, k431, k384]	0.34
k385	CH3OOH + R	CH2 + H2O2	376.51	8.11e-03	s^-1	Group 56	[k287, k602, k536, k285, k576, k471, k578, k289, k432, k385]	0.15
k386	CH3COCH3 + R	CH2 + CH2CHOH	477.66	8.15e-01	s^-1	Group 48	[k640, k538, k604, k653, k539, k623, k666, k242, k580, k388, k386, k631, k632, k387, k330, k331, k361]	9.48
k387	CH3COCH3 + R	CH2 + CH2OCH2	551.07	6.47e-01	s^-1	Group 48	[k640, k538, k604, k653, k539, k623, k666, k242, k580, k388, k386, k631, k632, k387, k330, k331, k361]	7.53
k388	CH3COCH3 + R	CH2 + CH3CHO	436.01	5.00e-01	s^-1	Group 48	[k640, k538, k604, k653, k539, k623, k666, k242, k580, k388, k386, k631, k632, k387, k330, k331, k361]	5.82
k389	C2H3O2 + R	CH2 + HOCO	436.57	8.41e-01	s^-1	Group 18	[k435, k641, k642, k581, k582, k389, k363, k624, k633, k362, k364]	14.49
k390	CH3COOH + R	CH2 + CH2OO	818.99	8.72e-04	s^-1	Group 49	[k540, k643, k436, k394, k654, k491, k625, k475, k483, k634, k332, k390, k398, k336]	0.02
k391	HCOOCH3 + R	CH2 + CH2OO	747.4	7.42e-02	s^-1	Group 133	[k541, k644, k437, k395, k655, k493, k626, k477, k485, k635, k333, k391, k399, k337]	1.35
k392	OHCH2CHO + R	CH2 + CH2OO	704.93	4.01e-01	s^-1	Group 201	[k542, k645, k438, k396, k656, k495, k627, k479, k487, k636, k334, k392, k400, k338]	5.36
k393	OHCHCHOH + R	CH2 + CH2OO	673.27	3.88e-01	s^-1	Group 202	[k543, k646, k439, k397, k657, k497, k628, k481, k489, k637, k335, k393, k401, k339]	4.77
k394	CH3COOH + R	CH2 + HCOOH	438.53	6.23e-01	s^-1	Group 49	[k540, k643, k436, k394, k654, k491, k625, k475, k483, k634, k332, k390, k398, k336]	12.82
k395	HCOOCH3 + R	CH2 + HCOOH	366.94	6.14e-01	s^-1	Group 133	[k541, k644, k437, k395, k655, k493, k626, k477, k485, k635, k333, k391, k399, k337]	11.19
k396	OHCH2CHO + R	CH2 + HCOOH	324.47	4.31e-01	s^-1	Group 201	[k542, k645, k438, k396, k656, k495, k627, k479, k487, k636, k334, k392, k400, k338]	5.76
k397	OHCHCHOH + R	CH2 + HCOOH	292.81	7.16e-01	s^-1	Group 202	[k543, k646, k439, k397, k657, k497, k628, k481, k489, k637, k335, k393, k401, k339]	8.79
k398	CH3COOH + R	CH2 + H2CO2	921.53	2.02e-02	s^-1	Group 49	[k540, k643, k436, k394, k654, k491, k625, k475, k483, k634, k332, k390, k398, k336]	0.42
k399	HCOOCH3 + R	CH2 + H2CO2	849.94	1.62e-01	s^-1	Group 133	[k541, k644, k437, k395, k655, k493, k626, k477, k485, k635, k333, k391, k399, k337]	2.95
k400	OHCH2CHO + R	CH2 + H2CO2	807.47	2.71e-02	s^-1	Group 201	[k542, k645, k438, k396, k656, k495, k627, k479, k487, k636, k334, k392, k400, k338]	0.36
k401	OHCHCHOH + R	CH2 + H2CO2	775.81	8.41e-01	s^-1	Group 202	[k543, k646, k439, k397, k657, k497, k628, k481, k489, k637, k335, k393, k401, k339]	10.33
k402	CH3CH2CH2OH + R	CH2 + CH3CH2OH	404.99	1.14e-02	s^-1	Group 40	[k546, k290, k544, k678, k658, k545, k440, k671, k672, k402, k403]	0.29
k403	CH3CH2CH2OH + R	CH2 + CH3OCH3	455.8	3.23e-03	s^-1	Group 40	[k546, k290, k544, k678, k658, k545, k440, k671, k672, k402, k403]	0.08
k404	H2CO3 + R	CH2 + O3	1137.77	3.05e-03	s^-1	Group 128	[k605, k254, k648, k292, k681, k669, k404]	0.09
k405	CH3CHOHOH + R	CH2 + CH2OHOH	364.58	7.16e-01	s^-1	Group 46	[k552, k293, k614, k606, k297, k301, k682, k610, k305, k660, k689, k548, k696, k587, k405, k700, k507, k556, k705, k256, k515, k674, k409]	9.00
k406	CH3OCH2OH + R	CH2 + CH2OHOH	310.12	7.80e-01	s^-1	Group 51	[k553, k294, k615, k607, k298, k302, k683, k611, k306, k661, k690, k549, k697, k588, k406, k701, k509, k557, k706, k258, k517, k675, k410]	7.02
k407	CH3OOCH3 + R	CH2 + CH2OHOH	86.91	5.74e-01	s^-1	Group 55	[k554, k295, k616, k608, k299, k303, k684, k612, k307, k662, k691, k550, k698, k589, k407, k702, k511, k558, k707, k260, k519, k676, k411]	4.55
k408	HOCH2CH2OH + R	CH2 + CH2OHOH	381.55	8.06e-01	s^-1	Group 136	[k555, k296, k617, k609, k300, k304, k685, k613, k308, k663, k692, k551, k699, k590, k408, k703, k513, k559, k708, k262, k521, k677, k412]	6.95
k409	CH3CHOHOH + R	CH2 + CH3OOH	628.87	2.59e-02	s^-1	Group 46	[k552, k293, k614, k606, k297, k301, k682, k610, k305, k660, k689, k548, k696, k587, k405, k700, k507, k556, k705, k256, k515, k674, k409]	0.33
k410	CH3OCH2OH + R	CH2 + CH3OOH	574.41	1.50e-03	s^-1	Group 51	[k553, k294, k615, k607, k298, k302, k683, k611, k306, k661, k690, k549, k697, k588, k406, k701, k509, k557, k706, k258, k517, k675, k410]	0.01
k411	CH3OOCH3 + R	CH2 + CH3OOH	351.2	5.35e-03	s^-1	Group 55	[k554, k295, k616, k608, k299, k303, k684, k612, k307, k662, k691, k550, k698, k589, k407, k702, k511, k558, k707, k260, k519, k676, k411]	0.04
k412	HOCH2CH2OH + R	CH2 + CH3OOH	645.84	1.65e-03	s^-1	Group 136	[k555, k296, k617, k609, k300, k304, k685, k613, k308, k663, k692, k551, k699, k590, k408, k703, k513, k559, k708, k262, k521, k677, k412]	0.01
k413	OHCCOOH + R	CH2 + CO3	648.35	2.81e-01	s^-1	Group 200	[k686, k650, k309, k618, k670, k368, k649, k710, k651, k711, k340, k716, k413, k717, k629]	4.15
k414	CH3CH2CHOHOH + R	CH2 + CH3CHOHOH	398.93	3.98e-01	s^-1	Group 42	[k560, k694, k619, k561, k562, k715, k563, k687, k664, k713, k688, k714, k712, k693, k665, k704, k709, k523, k444, k527, k417, k414, k695, k525, k415, k416]	3.27
k415	CH3CH2CHOHOH + R	CH2 + CH3OCH2OH	453.39	6.13e-02	s^-1	Group 42	[k560, k694, k619, k561, k562, k715, k563, k687, k664, k713, k688, k714, k712, k693, k665, k704, k709, k523, k444, k527, k417, k414, k695, k525, k415, k416]	0.50
k416	CH3CH2CHOHOH + R	CH2 + CH3OOCH3	676.6	4.47e-03	s^-1	Group 42	[k560, k694, k619, k561, k562, k715, k563, k687, k664, k713, k688, k714, k712, k693, k665, k704, k709, k523, k444, k527, k417, k414, k695, k525, k415, k416]	0.04
k417	CH3CH2CHOHOH + R	CH2 + HOCH2CH2OH	381.96	3.26e-01	s^-1	Group 42	[k560, k694, k619, k561, k562, k715, k563, k687, k664, k713, k688, k714, k712, k693, k665, k704, k709, k523, k444, k527, k417, k414, k695, k525, k415, k416]	2.68
k418	CH2OH + R	CH3 + O	407.08	1.03e-03	s^-1	Group 35	[k265, k222, k341, k418, k369]	0.08
k419	CH3 + O	CH2OH	-407.08	1.30e-23	cm^3 molecules^-1 s^-1	Group 38	[k419, k421, k1015, k720, k1080, k1097]	12.51
k420	CH3O + R	CH3 + O	367.79	1.11e-03	s^-1	Group 50	[k266, k224, k342, k420, k370]	0.07
k421	CH3 + O	CH3O	-367.79	3.58e-23	cm^3 molecules^-1 s^-1	Group 38	[k419, k421, k1015, k720, k1080, k1097]	34.46
k422	CH3OH + R	CH3 + OH	377.19	1.45e-02	s^-1	Group 54	[k371, k422]	6.95
k423	CH2CHOH + R	CH3 + HCO	304.63	6.01e-01	s^-1	Group 33	[k529, k269, k593, k272, k423, k374, k449, k565, k316, k346, k349]	12.64
k424	CH2OCH2 + R	CH3 + HCO	231.22	7.70e-01	s^-1	Group 34	[k530, k270, k594, k273, k424, k375, k451, k566, k317, k347, k350]	16.58
k425	CH3CHO + R	CH3 + HCO	346.28	5.41e-01	s^-1	Group 45	[k531, k271, k595, k274, k425, k376, k453, k567, k318, k348, k351]	12.66
k426	HOCHCH3 + R	CH3 + H2CO	87.35	2.89e-03	s^-1	Group 137	[k532, k426, k569, k457, k377, k353, k378]	0.79
k427	CH3CH2OH + R	CH3 + CH2OH	356.82	1.53e-01	s^-1	Group 43	[k599, k533, k282, k278, k280, k427, k573, k238, k465, k429, k382]	5.54
k428	CH3OCH3 + R	CH3 + CH2OH	306.01	2.34e-01	s^-1	Group 52	[k600, k534, k283, k279, k281, k428, k574, k240, k467, k430, k383]	6.08
k429	CH3CH2OH + R	CH3 + CH3O	396.11	2.45e-01	s^-1	Group 43	[k599, k533, k282, k278, k280, k427, k573, k238, k465, k429, k382]	8.87
k430	CH3OCH3 + R	CH3 + CH3O	345.3	1.89e-01	s^-1	Group 52	[k600, k534, k283, k279, k281, k428, k574, k240, k467, k430, k383]	4.91
k431	CH2OHOH + R	CH3 + HO2	544.17	4.05e-01	s^-1	Group 36	[k286, k601, k535, k284, k575, k469, k577, k288, k431, k384]	10.24
k432	CH3OOH + R	CH3 + HO2	279.88	2.73e-01	s^-1	Group 56	[k287, k602, k536, k285, k576, k471, k578, k289, k432, k385]	5.09
k433	CH3COCH2 + R	CH3 + H2CCO	123.0	4.41e-01	s^-1	Group 47	[k639, k652, k433, k537, k603, k630, k621, k579, k434, k622, k473, k360, k358, k359, k329]	7.17
k434	CH3COCH2 + R	CH3 + HCCOH	263.65	3.74e-01	s^-1	Group 47	[k639, k652, k433, k537, k603, k630, k621, k579, k434, k622, k473, k360, k358, k359, k329]	6.08
k435	C2H3O2 + R	CH3 + CO2	-16.54	6.53e-01	s^-1	Group 18	[k435, k641, k642, k581, k582, k389, k363, k624, k633, k362, k364]	11.25
k436	CH3COOH + R	CH3 + HOCO	387.22	7.91e-01	s^-1	Group 49	[k540, k643, k436, k394, k654, k491, k625, k475, k483, k634, k332, k390, k398, k336]	16.27
k437	HCOOCH3 + R	CH3 + HOCO	315.63	2.35e-01	s^-1	Group 133	[k541, k644, k437, k395, k655, k493, k626, k477, k485, k635, k333, k391, k399, k337]	4.28
k438	OHCH2CHO + R	CH3 + HOCO	273.16	8.29e-01	s^-1	Group 201	[k542, k645, k438, k396, k656, k495, k627, k479, k487, k636, k334, k392, k400, k338]	11.08
k439	OHCHCHOH + R	CH3 + HOCO	241.5	8.38e-01	s^-1	Group 202	[k543, k646, k439, k397, k657, k497, k628, k481, k489, k637, k335, k393, k401, k339]	10.29
k440	CH3CH2CH2OH + R	CH3 + HOCHCH3	338.27	3.50e-01	s^-1	Group 40	[k546, k290, k544, k678, k658, k545, k440, k671, k672, k402, k403]	9.01
k441	CH3OCHOH + R	CH3 + CH2OO	303.37	8.08e-01	s^-1	Group 53	[k547, k291, k442, k246, k668, k248, k586, k679, k250, k680, k584, k252, k585, k659, k673, k441, k638, k505, k366, k443, k367]	6.58
k442	CH3OCHOH + R	CH3 + HCOOH	-77.09	4.77e-01	s^-1	Group 53	[k547, k291, k442, k246, k668, k248, k586, k679, k250, k680, k584, k252, k585, k659, k673, k441, k638, k505, k366, k443, k367]	3.88
k443	CH3OCHOH + R	CH3 + H2CO2	405.91	2.49e-01	s^-1	Group 53	[k547, k291, k442, k246, k668, k248, k586, k679, k250, k680, k584, k252, k585, k659, k673, k441, k638, k505, k366, k443, k367]	2.03
k444	CH3CH2CHOHOH + R	CH3 + CH3OCHOH	366.35	3.05e-01	s^-1	Group 42	[k560, k694, k619, k561, k562, k715, k563, k687, k664, k713, k688, k714, k712, k693, k665, k704, k709, k523, k444, k527, k417, k414, k695, k525, k415, k416]	2.50
k445	H2CCO + R	O + CHCH	521.08	1.50e-01	s^-1	Group 125	[k372, k267, k226, k445, k591, k312, k344]	8.79
k446	O + CHCH	H2CCO	-521.08	2.46e-23	cm^3 molecules^-1 s^-1	Group 179	[k446, k448, k1098, k1018, k737, k1154, k1059, k1081]	11.18
k447	HCCOH + R	O + CHCH	380.43	2.46e-01	s^-1	Group 131	[k373, k268, k228, k447, k592, k314, k345]	9.10
k448	O + CHCH	HCCOH	-380.43	4.47e-23	cm^3 molecules^-1 s^-1	Group 179	[k446, k448, k1098, k1018, k737, k1154, k1059, k1081]	20.32
k449	CH2CHOH + R	O + CH2CH2	421.11	6.13e-01	s^-1	Group 33	[k529, k269, k593, k272, k423, k374, k449, k565, k316, k346, k349]	12.90
k450	O + CH2CH2	CH2CHOH	-421.11	4.75e-23	cm^3 molecules^-1 s^-1	Group 153	[k1156, k454, k450, k1020, k452, k1158, k1021, k1132, k1100, k1157]	18.63
k451	CH2OCH2 + R	O + CH2CH2	347.7	4.53e-01	s^-1	Group 34	[k530, k270, k594, k273, k424, k375, k451, k566, k317, k347, k350]	9.75
k452	O + CH2CH2	CH2OCH2	-347.7	2.28e-23	cm^3 molecules^-1 s^-1	Group 153	[k1156, k454, k450, k1020, k452, k1158, k1021, k1132, k1100, k1157]	8.94
k453	CH3CHO + R	O + CH2CH2	462.76	6.50e-01	s^-1	Group 45	[k531, k271, k595, k274, k425, k376, k453, k567, k318, k348, k351]	15.21
k454	O + CH2CH2	CH3CHO	-462.76	3.31e-23	cm^3 molecules^-1 s^-1	Group 153	[k1156, k454, k450, k1020, k452, k1158, k1021, k1132, k1100, k1157]	12.98
k455	HOCO + R	O + HCO	469.4	2.60e-04	s^-1	Group 138	[k230, k568, k455, k352, k319]	1.45
k456	O + HCO	HOCO	-469.4	2.39e-23	cm^3 molecules^-1 s^-1	Group 189	[k456, k752, k1159]	98.65
k457	HOCHCH3 + R	O + C2H5	421.08	3.60e-03	s^-1	Group 137	[k532, k426, k569, k457, k377, k353, k378]	0.99
k458	O + C2H5	HOCHCH3	-421.08	2.97e-23	cm^3 molecules^-1 s^-1	Group 142	[k458, k1160, k1133, k1161, k1101, k1083, k1102]	19.28
k459	CH2OO + R	O + H2CO	132.05	2.14e-01	s^-1	Group 37	[k275, k596, k232, k570, k459, k379, k321, k354]	7.80
k460	O + H2CO	CH2OO	-132.05	4.22e-23	cm^3 molecules^-1 s^-1	Group 183	[k1023, k462, k1163, k460, k766, k1162, k464]	20.03
k461	HCOOH + R	O + H2CO	512.51	8.04e-07	s^-1	Group 134	[k276, k597, k234, k571, k461, k380, k323, k355]	1.16
k462	O + H2CO	HCOOH	-512.51	4.96e-23	cm^3 molecules^-1 s^-1	Group 183	[k1023, k462, k1163, k460, k766, k1162, k464]	23.54
k463	H2CO2 + R	O + H2CO	29.51	5.22e-01	s^-1	Group 127	[k277, k598, k236, k572, k463, k381, k325, k356]	12.20
k464	O + H2CO	H2CO2	-29.51	1.79e-26	cm^3 molecules^-1 s^-1	Group 183	[k1023, k462, k1163, k460, k766, k1162, k464]	0.01
k465	CH3CH2OH + R	O + CH3CH3	395.77	1.11e-01	s^-1	Group 43	[k599, k533, k282, k278, k280, k427, k573, k238, k465, k429, k382]	4.02
k466	O + CH3CH3	CH3CH2OH	-395.77	3.62e-23	cm^3 molecules^-1 s^-1	Group 163	[k466, k1166, k1164, k468, k1026, k1024, k1025, k1134, k1165, k776, k1135, k1103]	12.25
k467	CH3OCH3 + R	O + CH3CH3	344.96	2.57e-01	s^-1	Group 52	[k600, k534, k283, k279, k281, k428, k574, k240, k467, k430, k383]	6.68
k468	O + CH3CH3	CH3OCH3	-344.96	3.32e-23	cm^3 molecules^-1 s^-1	Group 163	[k466, k1166, k1164, k468, k1026, k1024, k1025, k1134, k1165, k776, k1135, k1103]	11.24
k469	CH2OHOH + R	O + CH3OH	435.96	7.91e-01	s^-1	Group 36	[k286, k601, k535, k284, k575, k469, k577, k288, k431, k384]	20.00
k470	O + CH3OH	CH2OHOH	-435.96	2.41e-23	cm^3 molecules^-1 s^-1	Group 175	[k470, k1030, k1176, k472, k1173, k1029, k1174, k1175, k1031, k1138]	15.57
k471	CH3OOH + R	O + CH3OH	171.67	7.52e-01	s^-1	Group 56	[k287, k602, k536, k285, k576, k471, k578, k289, k432, k385]	14.02
k472	O + CH3OH	CH3OOH	-171.67	1.02e-23	cm^3 molecules^-1 s^-1	Group 175	[k470, k1030, k1176, k472, k1173, k1029, k1174, k1175, k1031, k1138]	6.59
k473	CH3COCH2 + R	O + C3H5	445.28	2.92e-01	s^-1	Group 47	[k639, k652, k433, k537, k603, k630, k621, k579, k434, k622, k473, k360, k358, k359, k329]	4.75
k474	O + C3H5	CH3COCH2	-445.28	3.53e-23	cm^3 molecules^-1 s^-1	Group 149	[k474, k1192, k1193, k1141, k1186, k1188, k1191, k1189, k1187, k1142, k1190, k1089, k1087, k1088]	9.08
k475	CH3COOH + R	O + CH2CHOH	551.99	8.40e-01	s^-1	Group 49	[k540, k643, k436, k394, k654, k491, k625, k475, k483, k634, k332, k390, k398, k336]	17.28
k476	O + CH2CHOH	CH3COOH	-551.99	4.20e-23	cm^3 molecules^-1 s^-1	Group 154	[k1206, k476, k478, k480, k1209, k482, k1143, k1110, k1210, k1204, k1207, k1202, k1208, k1077]	10.97
k477	HCOOCH3 + R	O + CH2CHOH	480.4	3.99e-01	s^-1	Group 133	[k541, k644, k437, k395, k655, k493, k626, k477, k485, k635, k333, k391, k399, k337]	7.27
k478	O + CH2CHOH	HCOOCH3	-480.4	4.63e-23	cm^3 molecules^-1 s^-1	Group 154	[k1206, k476, k478, k480, k1209, k482, k1143, k1110, k1210, k1204, k1207, k1202, k1208, k1077]	12.09
k479	OHCH2CHO + R	O + CH2CHOH	437.93	6.62e-01	s^-1	Group 201	[k542, k645, k438, k396, k656, k495, k627, k479, k487, k636, k334, k392, k400, k338]	8.85
k480	O + CH2CHOH	OHCH2CHO	-437.93	2.81e-23	cm^3 molecules^-1 s^-1	Group 154	[k1206, k476, k478, k480, k1209, k482, k1143, k1110, k1210, k1204, k1207, k1202, k1208, k1077]	7.34
k481	OHCHCHOH + R	O + CH2CHOH	406.27	6.56e-01	s^-1	Group 202	[k543, k646, k439, k397, k657, k497, k628, k481, k489, k637, k335, k393, k401, k339]	8.06
k482	O + CH2CHOH	OHCHCHOH	-406.27	1.22e-23	cm^3 molecules^-1 s^-1	Group 154	[k1206, k476, k478, k480, k1209, k482, k1143, k1110, k1210, k1204, k1207, k1202, k1208, k1077]	3.19
k483	CH3COOH + R	O + CH2OCH2	625.4	1.34e-01	s^-1	Group 49	[k540, k643, k436, k394, k654, k491, k625, k475, k483, k634, k332, k390, k398, k336]	2.76
k484	O + CH2OCH2	CH3COOH	-625.4	3.92e-23	cm^3 molecules^-1 s^-1	Group 155	[k1213, k484, k486, k488, k1216, k490, k1144, k1111, k1217, k1211, k1214, k1203, k1215, k1078, k1109]	10.74
k485	HCOOCH3 + R	O + CH2OCH2	553.81	3.31e-01	s^-1	Group 133	[k541, k644, k437, k395, k655, k493, k626, k477, k485, k635, k333, k391, k399, k337]	6.03
k486	O + CH2OCH2	HCOOCH3	-553.81	2.87e-23	cm^3 molecules^-1 s^-1	Group 155	[k1213, k484, k486, k488, k1216, k490, k1144, k1111, k1217, k1211, k1214, k1203, k1215, k1078, k1109]	7.86
k487	OHCH2CHO + R	O + CH2OCH2	511.34	4.00e-01	s^-1	Group 201	[k542, k645, k438, k396, k656, k495, k627, k479, k487, k636, k334, k392, k400, k338]	5.34
k488	O + CH2OCH2	OHCH2CHO	-511.34	3.27e-23	cm^3 molecules^-1 s^-1	Group 155	[k1213, k484, k486, k488, k1216, k490, k1144, k1111, k1217, k1211, k1214, k1203, k1215, k1078, k1109]	8.96
k489	OHCHCHOH + R	O + CH2OCH2	479.68	6.72e-01	s^-1	Group 202	[k543, k646, k439, k397, k657, k497, k628, k481, k489, k637, k335, k393, k401, k339]	8.25
k490	O + CH2OCH2	OHCHCHOH	-479.68	3.39e-23	cm^3 molecules^-1 s^-1	Group 155	[k1213, k484, k486, k488, k1216, k490, k1144, k1111, k1217, k1211, k1214, k1203, k1215, k1078, k1109]	9.29
k491	CH3COOH + R	O + CH3CHO	510.34	3.34e-01	s^-1	Group 49	[k540, k643, k436, k394, k654, k491, k625, k475, k483, k634, k332, k390, k398, k336]	6.87
k492	O + CH3CHO	CH3COOH	-510.34	1.78e-23	cm^3 molecules^-1 s^-1	Group 164	[k1218, k492, k494, k496, k1220, k498, k1145, k1112, k1221, k1219, k1205, k1212]	5.88
k493	HCOOCH3 + R	O + CH3CHO	438.75	3.89e-01	s^-1	Group 133	[k541, k644, k437, k395, k655, k493, k626, k477, k485, k635, k333, k391, k399, k337]	7.09
k494	O + CH3CHO	HCOOCH3	-438.75	3.98e-23	cm^3 molecules^-1 s^-1	Group 164	[k1218, k492, k494, k496, k1220, k498, k1145, k1112, k1221, k1219, k1205, k1212]	13.14
k495	OHCH2CHO + R	O + CH3CHO	396.28	3.10e-01	s^-1	Group 201	[k542, k645, k438, k396, k656, k495, k627, k479, k487, k636, k334, k392, k400, k338]	4.14
k496	O + CH3CHO	OHCH2CHO	-396.28	1.49e-23	cm^3 molecules^-1 s^-1	Group 164	[k1218, k492, k494, k496, k1220, k498, k1145, k1112, k1221, k1219, k1205, k1212]	4.92
k497	OHCHCHOH + R	O + CH3CHO	364.62	5.10e-01	s^-1	Group 202	[k543, k646, k439, k397, k657, k497, k628, k481, k489, k637, k335, k393, k401, k339]	6.26
k498	O + CH3CHO	OHCHCHOH	-364.62	2.09e-23	cm^3 molecules^-1 s^-1	Group 164	[k1218, k492, k494, k496, k1220, k498, k1145, k1112, k1221, k1219, k1205, k1212]	6.90
k499	CH3CHOHCH3 + R	O + CH3CH2CH3	412.79	1.44e-02	s^-1	Single (order=1)	-	100.00
k500	O + CH3CH2CH3	CH3CHOHCH3	-412.79	1.06e-23	cm^3 molecules^-1 s^-1	Group 160	[k500, k502]	53.27
k501	CH3OCH2CH3 + R	O + CH3CH2CH3	358.9	3.00e-03	s^-1	Single (order=1)	-	100.00
k502	O + CH3CH2CH3	CH3OCH2CH3	-358.9	9.30e-24	cm^3 molecules^-1 s^-1	Group 160	[k500, k502]	46.73
k503	HCO3 + R	O + HOCO	784.96	7.09e-02	s^-1	Group 132	[k583, k647, k667, k244, k503, k365]	3.88
k504	O + HOCO	HCO3	-784.96	4.20e-23	cm^3 molecules^-1 s^-1	Group 194	[k504, k1222, k1223, k1224, k852]	67.62
k505	CH3OCHOH + R	O + HOCHCH3	348.07	4.36e-01	s^-1	Group 53	[k547, k291, k442, k246, k668, k248, k586, k679, k250, k680, k584, k252, k585, k659, k673, k441, k638, k505, k366, k443, k367]	3.55
k506	O + HOCHCH3	CH3OCHOH	-348.07	8.28e-24	cm^3 molecules^-1 s^-1	Group 193	[k1225, k1034, k1147, k864, k1231, k506, k878, k1228, k1233, k890, k1234, k1226, k901, k1227, k1230, k1232, k1146, k1229, k1090, k1148]	2.07
k507	CH3CHOHOH + R	O + CH3CH2OH	382.21	2.92e-01	s^-1	Group 46	[k552, k293, k614, k606, k297, k301, k682, k610, k305, k660, k689, k548, k696, k587, k405, k700, k507, k556, k705, k256, k515, k674, k409]	3.67
k508	O + CH3CH2OH	CH3CHOHOH	-382.21	4.98e-23	cm^3 molecules^-1 s^-1	Group 162	[k1245, k1035, k1250, k514, k508, k1248, k1037, k1039, k510, k1253, k1249, k1041, k512, k1251, k1254, k1244, k1255, k1247, k1113, k1256, k1246, k1257, k924, k1242, k1252]	7.43
k509	CH3OCH2OH + R	O + CH3CH2OH	327.75	7.90e-01	s^-1	Group 51	[k553, k294, k615, k607, k298, k302, k683, k611, k306, k661, k690, k549, k697, k588, k406, k701, k509, k557, k706, k258, k517, k675, k410]	7.11
k510	O + CH3CH2OH	CH3OCH2OH	-327.75	4.57e-23	cm^3 molecules^-1 s^-1	Group 162	[k1245, k1035, k1250, k514, k508, k1248, k1037, k1039, k510, k1253, k1249, k1041, k512, k1251, k1254, k1244, k1255, k1247, k1113, k1256, k1246, k1257, k924, k1242, k1252]	6.82
k511	CH3OOCH3 + R	O + CH3CH2OH	104.54	6.43e-01	s^-1	Group 55	[k554, k295, k616, k608, k299, k303, k684, k612, k307, k662, k691, k550, k698, k589, k407, k702, k511, k558, k707, k260, k519, k676, k411]	5.09
k512	O + CH3CH2OH	CH3OOCH3	-104.54	1.93e-23	cm^3 molecules^-1 s^-1	Group 162	[k1245, k1035, k1250, k514, k508, k1248, k1037, k1039, k510, k1253, k1249, k1041, k512, k1251, k1254, k1244, k1255, k1247, k1113, k1256, k1246, k1257, k924, k1242, k1252]	2.88
k513	HOCH2CH2OH + R	O + CH3CH2OH	399.18	2.81e-01	s^-1	Group 136	[k555, k296, k617, k609, k300, k304, k685, k613, k308, k663, k692, k551, k699, k590, k408, k703, k513, k559, k708, k262, k521, k677, k412]	2.42
k514	O + CH3CH2OH	HOCH2CH2OH	-399.18	9.71e-24	cm^3 molecules^-1 s^-1	Group 162	[k1245, k1035, k1250, k514, k508, k1248, k1037, k1039, k510, k1253, k1249, k1041, k512, k1251, k1254, k1244, k1255, k1247, k1113, k1256, k1246, k1257, k924, k1242, k1252]	1.45
k515	CH3CHOHOH + R	O + CH3OCH3	433.02	3.32e-01	s^-1	Group 46	[k552, k293, k614, k606, k297, k301, k682, k610, k305, k660, k689, k548, k696, k587, k405, k700, k507, k556, k705, k256, k515, k674, k409]	4.18
k516	O + CH3OCH3	CH3CHOHOH	-433.02	3.49e-23	cm^3 molecules^-1 s^-1	Group 173	[k1259, k1036, k1264, k522, k516, k1262, k1038, k1040, k518, k1267, k1263, k1042, k520, k1265, k1268, k1258, k1269, k1261, k1114, k1270, k1243, k1260, k1271, k926, k1266, k1115]	4.44
k517	CH3OCH2OH + R	O + CH3OCH3	378.56	1.96e-01	s^-1	Group 51	[k553, k294, k615, k607, k298, k302, k683, k611, k306, k661, k690, k549, k697, k588, k406, k701, k509, k557, k706, k258, k517, k675, k410]	1.76
k518	O + CH3OCH3	CH3OCH2OH	-378.56	2.91e-23	cm^3 molecules^-1 s^-1	Group 173	[k1259, k1036, k1264, k522, k516, k1262, k1038, k1040, k518, k1267, k1263, k1042, k520, k1265, k1268, k1258, k1269, k1261, k1114, k1270, k1243, k1260, k1271, k926, k1266, k1115]	3.71
k519	CH3OOCH3 + R	O + CH3OCH3	155.35	5.76e-02	s^-1	Group 55	[k554, k295, k616, k608, k299, k303, k684, k612, k307, k662, k691, k550, k698, k589, k407, k702, k511, k558, k707, k260, k519, k676, k411]	0.46
k520	O + CH3OCH3	CH3OOCH3	-155.35	3.15e-23	cm^3 molecules^-1 s^-1	Group 173	[k1259, k1036, k1264, k522, k516, k1262, k1038, k1040, k518, k1267, k1263, k1042, k520, k1265, k1268, k1258, k1269, k1261, k1114, k1270, k1243, k1260, k1271, k926, k1266, k1115]	4.01
k521	HOCH2CH2OH + R	O + CH3OCH3	449.99	4.88e-01	s^-1	Group 136	[k555, k296, k617, k609, k300, k304, k685, k613, k308, k663, k692, k551, k699, k590, k408, k703, k513, k559, k708, k262, k521, k677, k412]	4.21
k522	O + CH3OCH3	HOCH2CH2OH	-449.99	4.91e-23	cm^3 molecules^-1 s^-1	Group 173	[k1259, k1036, k1264, k522, k516, k1262, k1038, k1040, k518, k1267, k1263, k1042, k520, k1265, k1268, k1258, k1269, k1261, k1114, k1270, k1243, k1260, k1271, k926, k1266, k1115]	6.25
k523	CH3CH2CHOHOH + R	O + CH3CHOHCH3	358.74	5.06e-01	s^-1	Group 42	[k560, k694, k619, k561, k562, k715, k563, k687, k664, k713, k688, k714, k712, k693, k665, k704, k709, k523, k444, k527, k417, k414, k695, k525, k415, k416]	4.15
k524	O + CH3CHOHCH3	CH3CH2CHOHOH	-358.74	5.03e-23	cm^3 molecules^-1 s^-1	Group 165	[k1383, k1393, k1387, k1384, k1385, k524, k1400, k1386, k1390, k1388, k1398, k1391, k1399, k1397, k1392, k1389, k1395, k1396, k1151, k1381, k1128, k1122, k1394, k1379, k1125]	6.32
k525	CH3CH2CHOHOH + R	O + CH3OCH2CH3	412.63	7.73e-02	s^-1	Group 42	[k560, k694, k619, k561, k562, k715, k563, k687, k664, k713, k688, k714, k712, k693, k665, k704, k709, k523, k444, k527, k417, k414, k695, k525, k415, k416]	0.63
k526	O + CH3OCH2CH3	CH3CH2CHOHOH	-412.63	2.03e-23	cm^3 molecules^-1 s^-1	Group 171	[k1403, k1413, k1407, k1404, k1405, k526, k1420, k1406, k1410, k1408, k1418, k1411, k1419, k1417, k1412, k1409, k1415, k1416, k1380, k1152, k1401, k1129, k1123, k1414, k1126]	2.60
k527	CH3CH2CHOHOH + R	O + CH3CH2CH2OH	376.15	3.03e-01	s^-1	Group 42	[k560, k694, k619, k561, k562, k715, k563, k687, k664, k713, k688, k714, k712, k693, k665, k704, k709, k523, k444, k527, k417, k414, k695, k525, k415, k416]	2.49
k528	O + CH3CH2CH2OH	CH3CH2CHOHOH	-376.15	2.34e-23	cm^3 molecules^-1 s^-1	Group 159	[k1421, k1431, k1425, k1422, k1423, k528, k1438, k1424, k1428, k1426, k1436, k1429, k1437, k1435, k1430, k1427, k1433, k1434, k1382, k1153, k1130, k1124, k1432, k1402, k1127]	3.83
k529	CH2CHOH + R	CH4 + CO	-66.97	1.96e-01	s^-1	Group 33	[k529, k269, k593, k272, k423, k374, k449, k565, k316, k346, k349]	4.12
k530	CH2OCH2 + R	CH4 + CO	-140.38	5.09e-01	s^-1	Group 34	[k530, k270, k594, k273, k424, k375, k451, k566, k317, k347, k350]	10.96
k531	CH3CHO + R	CH4 + CO	-25.32	1.56e-01	s^-1	Group 45	[k531, k271, k595, k274, k425, k376, k453, k567, k318, k348, k351]	3.65
k532	HOCHCH3 + R	CH4 + HCO	17.69	3.51e-01	s^-1	Group 137	[k532, k426, k569, k457, k377, k353, k378]	96.36
k533	CH3CH2OH + R	CH4 + H2CO	45.39	3.89e-01	s^-1	Group 43	[k599, k533, k282, k278, k280, k427, k573, k238, k465, k429, k382]	14.08
k534	CH3OCH3 + R	CH4 + H2CO	-5.42	5.89e-01	s^-1	Group 52	[k600, k534, k283, k279, k281, k428, k574, k240, k467, k430, k383]	15.30
k535	CH2OHOH + R	CH4 + O2	312.61	2.36e-01	s^-1	Group 36	[k286, k601, k535, k284, k575, k469, k577, k288, k431, k384]	5.97
k536	CH3OOH + R	CH4 + O2	48.32	7.80e-01	s^-1	Group 56	[k287, k602, k536, k285, k576, k471, k578, k289, k432, k385]	14.55
k537	CH3COCH2 + R	CH4 + C2OH	129.0	1.94e-01	s^-1	Group 47	[k639, k652, k433, k537, k603, k630, k621, k579, k434, k622, k473, k360, k358, k359, k329]	3.15
k538	CH3COCH3 + R	CH4 + H2CCO	88.08	7.69e-01	s^-1	Group 48	[k640, k538, k604, k653, k539, k623, k666, k242, k580, k388, k386, k631, k632, k387, k330, k331, k361]	8.95
k539	CH3COCH3 + R	CH4 + HCCOH	228.73	5.90e-01	s^-1	Group 48	[k640, k538, k604, k653, k539, k623, k666, k242, k580, k388, k386, k631, k632, k387, k330, k331, k361]	6.86
k540	CH3COOH + R	CH4 + CO2	-41.13	3.38e-01	s^-1	Group 49	[k540, k643, k436, k394, k654, k491, k625, k475, k483, k634, k332, k390, k398, k336]	6.95
k541	HCOOCH3 + R	CH4 + CO2	-112.72	4.22e-01	s^-1	Group 133	[k541, k644, k437, k395, k655, k493, k626, k477, k485, k635, k333, k391, k399, k337]	7.69
k542	OHCH2CHO + R	CH4 + CO2	-155.19	8.41e-01	s^-1	Group 201	[k542, k645, k438, k396, k656, k495, k627, k479, k487, k636, k334, k392, k400, k338]	11.24
k543	OHCHCHOH + R	CH4 + CO2	-186.85	3.81e-01	s^-1	Group 202	[k543, k646, k439, k397, k657, k497, k628, k481, k489, k637, k335, k393, k401, k339]	4.68
k544	CH3CH2CH2OH + R	CH4 + CH2CHOH	51.33	4.61e-01	s^-1	Group 40	[k546, k290, k544, k678, k658, k545, k440, k671, k672, k402, k403]	11.87
k545	CH3CH2CH2OH + R	CH4 + CH2OCH2	124.74	5.40e-01	s^-1	Group 40	[k546, k290, k544, k678, k658, k545, k440, k671, k672, k402, k403]	13.90
k546	CH3CH2CH2OH + R	CH4 + CH3CHO	9.68	4.67e-01	s^-1	Group 40	[k546, k290, k544, k678, k658, k545, k440, k671, k672, k402, k403]	12.02
k547	CH3OCHOH + R	CH4 + HOCO	-103.64	8.39e-01	s^-1	Group 53	[k547, k291, k442, k246, k668, k248, k586, k679, k250, k680, k584, k252, k585, k659, k673, k441, k638, k505, k366, k443, k367]	6.83
k548	CH3CHOHOH + R	CH4 + CH2OO	295.55	7.41e-01	s^-1	Group 46	[k552, k293, k614, k606, k297, k301, k682, k610, k305, k660, k689, k548, k696, k587, k405, k700, k507, k556, k705, k256, k515, k674, k409]	9.32
k549	CH3OCH2OH + R	CH4 + CH2OO	241.09	5.53e-01	s^-1	Group 51	[k553, k294, k615, k607, k298, k302, k683, k611, k306, k661, k690, k549, k697, k588, k406, k701, k509, k557, k706, k258, k517, k675, k410]	4.98
k550	CH3OOCH3 + R	CH4 + CH2OO	17.88	7.77e-01	s^-1	Group 55	[k554, k295, k616, k608, k299, k303, k684, k612, k307, k662, k691, k550, k698, k589, k407, k702, k511, k558, k707, k260, k519, k676, k411]	6.16
k551	HOCH2CH2OH + R	CH4 + CH2OO	312.52	8.40e-01	s^-1	Group 136	[k555, k296, k617, k609, k300, k304, k685, k613, k308, k663, k692, k551, k699, k590, k408, k703, k513, k559, k708, k262, k521, k677, k412]	7.25
k552	CH3CHOHOH + R	CH4 + HCOOH	-84.91	4.03e-01	s^-1	Group 46	[k552, k293, k614, k606, k297, k301, k682, k610, k305, k660, k689, k548, k696, k587, k405, k700, k507, k556, k705, k256, k515, k674, k409]	5.07
k553	CH3OCH2OH + R	CH4 + HCOOH	-139.37	2.96e-01	s^-1	Group 51	[k553, k294, k615, k607, k298, k302, k683, k611, k306, k661, k690, k549, k697, k588, k406, k701, k509, k557, k706, k258, k517, k675, k410]	2.66
k554	CH3OOCH3 + R	CH4 + HCOOH	-362.58	7.55e-01	s^-1	Group 55	[k554, k295, k616, k608, k299, k303, k684, k612, k307, k662, k691, k550, k698, k589, k407, k702, k511, k558, k707, k260, k519, k676, k411]	5.98
k555	HOCH2CH2OH + R	CH4 + HCOOH	-67.94	8.49e-01	s^-1	Group 136	[k555, k296, k617, k609, k300, k304, k685, k613, k308, k663, k692, k551, k699, k590, k408, k703, k513, k559, k708, k262, k521, k677, k412]	7.32
k556	CH3CHOHOH + R	CH4 + H2CO2	398.09	1.77e-01	s^-1	Group 46	[k552, k293, k614, k606, k297, k301, k682, k610, k305, k660, k689, k548, k696, k587, k405, k700, k507, k556, k705, k256, k515, k674, k409]	2.23
k557	CH3OCH2OH + R	CH4 + H2CO2	343.63	5.32e-01	s^-1	Group 51	[k553, k294, k615, k607, k298, k302, k683, k611, k306, k661, k690, k549, k697, k588, k406, k701, k509, k557, k706, k258, k517, k675, k410]	4.79
k558	CH3OOCH3 + R	CH4 + H2CO2	120.42	8.42e-01	s^-1	Group 55	[k554, k295, k616, k608, k299, k303, k684, k612, k307, k662, k691, k550, k698, k589, k407, k702, k511, k558, k707, k260, k519, k676, k411]	6.67
k559	HOCH2CH2OH + R	CH4 + H2CO2	415.06	5.56e-01	s^-1	Group 136	[k555, k296, k617, k609, k300, k304, k685, k613, k308, k663, k692, k551, k699, k590, k408, k703, k513, k559, k708, k262, k521, k677, k412]	4.80
k560	CH3CH2CHOHOH + R	CH4 + CH3COOH	-124.51	8.44e-01	s^-1	Group 42	[k560, k694, k619, k561, k562, k715, k563, k687, k664, k713, k688, k714, k712, k693, k665, k704, k709, k523, k444, k527, k417, k414, k695, k525, k415, k416]	6.93
k561	CH3CH2CHOHOH + R	CH4 + HCOOCH3	-52.92	2.05e-01	s^-1	Group 42	[k560, k694, k619, k561, k562, k715, k563, k687, k664, k713, k688, k714, k712, k693, k665, k704, k709, k523, k444, k527, k417, k414, k695, k525, k415, k416]	1.68
k562	CH3CH2CHOHOH + R	CH4 + OHCH2CHO	-10.45	5.51e-01	s^-1	Group 42	[k560, k694, k619, k561, k562, k715, k563, k687, k664, k713, k688, k714, k712, k693, k665, k704, k709, k523, k444, k527, k417, k414, k695, k525, k415, k416]	4.52
k563	CH3CH2CHOHOH + R	CH4 + OHCHCHOH	21.21	8.42e-01	s^-1	Group 42	[k560, k694, k619, k561, k562, k715, k563, k687, k664, k713, k688, k714, k712, k693, k665, k704, k709, k523, k444, k527, k417, k414, k695, k525, k415, k416]	6.91
k564	C2OH + R	OH + C2	680.22	1.33e-03	s^-1	Group 23	[k343, k310, k564]	0.24
k565	CH2CHOH + R	OH + C2H3	451.92	7.21e-01	s^-1	Group 33	[k529, k269, k593, k272, k423, k374, k449, k565, k316, k346, k349]	15.17
k566	CH2OCH2 + R	OH + C2H3	378.51	3.77e-01	s^-1	Group 34	[k530, k270, k594, k273, k424, k375, k451, k566, k317, k347, k350]	8.12
k567	CH3CHO + R	OH + C2H3	493.57	2.50e-01	s^-1	Group 45	[k531, k271, k595, k274, k425, k376, k453, k567, k318, k348, k351]	5.85
k568	HOCO + R	OH + CO	104.66	1.11e-04	s^-1	Group 138	[k230, k568, k455, k352, k319]	0.62
k569	HOCHCH3 + R	OH + CH2CH2	141.03	1.92e-03	s^-1	Group 137	[k532, k426, k569, k457, k377, k353, k378]	0.53
k570	CH2OO + R	OH + HCO	69.25	3.46e-01	s^-1	Group 37	[k275, k596, k232, k570, k459, k379, k321, k354]	12.61
k571	HCOOH + R	OH + HCO	449.71	3.34e-05	s^-1	Group 134	[k276, k597, k234, k571, k461, k380, k323, k355]	48.11
k572	H2CO2 + R	OH + HCO	-33.29	6.45e-01	s^-1	Group 127	[k277, k598, k236, k572, k463, k381, k325, k356]	15.07
k573	CH3CH2OH + R	OH + C2H5	385.98	2.21e-01	s^-1	Group 43	[k599, k533, k282, k278, k280, k427, k573, k238, k465, k429, k382]	8.00
k574	CH3OCH3 + R	OH + C2H5	335.17	3.13e-01	s^-1	Group 52	[k600, k534, k283, k279, k281, k428, k574, k240, k467, k430, k383]	8.13
k575	CH2OHOH + R	OH + CH2OH	406.07	6.42e-01	s^-1	Group 36	[k286, k601, k535, k284, k575, k469, k577, k288, k431, k384]	16.23
k576	CH3OOH + R	OH + CH2OH	141.78	3.98e-01	s^-1	Group 56	[k287, k602, k536, k285, k576, k471, k578, k289, k432, k385]	7.42
k577	CH2OHOH + R	OH + CH3O	445.36	3.50e-01	s^-1	Group 36	[k286, k601, k535, k284, k575, k469, k577, k288, k431, k384]	8.85
k578	CH3OOH + R	OH + CH3O	181.07	3.77e-01	s^-1	Group 56	[k287, k602, k536, k285, k576, k471, k578, k289, k432, k385]	7.03
k579	CH3COCH2 + R	OH + C3H4	248.44	4.08e-01	s^-1	Group 47	[k639, k652, k433, k537, k603, k630, k621, k579, k434, k622, k473, k360, k358, k359, k329]	6.63
k580	CH3COCH3 + R	OH + C3H5	417.22	4.64e-01	s^-1	Group 48	[k640, k538, k604, k653, k539, k623, k666, k242, k580, k388, k386, k631, k632, k387, k330, k331, k361]	5.40
k581	C2H3O2 + R	OH + H2CCO	218.62	4.61e-01	s^-1	Group 18	[k435, k641, k642, k581, k582, k389, k363, k624, k633, k362, k364]	7.94
k582	C2H3O2 + R	OH + HCCOH	359.27	8.24e-01	s^-1	Group 18	[k435, k641, k642, k581, k582, k389, k363, k624, k633, k362, k364]	14.19
k583	HCO3 + R	OH + CO2	363.47	7.73e-01	s^-1	Group 132	[k583, k647, k667, k244, k503, k365]	42.34
k584	CH3OCHOH + R	OH + CH2CHOH	67.99	2.60e-01	s^-1	Group 53	[k547, k291, k442, k246, k668, k248, k586, k679, k250, k680, k584, k252, k585, k659, k673, k441, k638, k505, k366, k443, k367]	2.12
k585	CH3OCHOH + R	OH + CH2OCH2	141.4	3.38e-01	s^-1	Group 53	[k547, k291, k442, k246, k668, k248, k586, k679, k250, k680, k584, k252, k585, k659, k673, k441, k638, k505, k366, k443, k367]	2.75
k586	CH3OCHOH + R	OH + CH3CHO	26.34	7.86e-01	s^-1	Group 53	[k547, k291, k442, k246, k668, k248, k586, k679, k250, k680, k584, k252, k585, k659, k673, k441, k638, k505, k366, k443, k367]	6.40
k587	CH3CHOHOH + R	OH + HOCHCH3	347.11	1.19e-01	s^-1	Group 46	[k552, k293, k614, k606, k297, k301, k682, k610, k305, k660, k689, k548, k696, k587, k405, k700, k507, k556, k705, k256, k515, k674, k409]	1.50
k588	CH3OCH2OH + R	OH + HOCHCH3	292.65	6.03e-01	s^-1	Group 51	[k553, k294, k615, k607, k298, k302, k683, k611, k306, k661, k690, k549, k697, k588, k406, k701, k509, k557, k706, k258, k517, k675, k410]	5.43
k589	CH3OOCH3 + R	OH + HOCHCH3	69.44	4.00e-01	s^-1	Group 55	[k554, k295, k616, k608, k299, k303, k684, k612, k307, k662, k691, k550, k698, k589, k407, k702, k511, k558, k707, k260, k519, k676, k411]	3.17
k590	HOCH2CH2OH + R	OH + HOCHCH3	364.08	6.59e-01	s^-1	Group 136	[k555, k296, k617, k609, k300, k304, k685, k613, k308, k663, k692, k551, k699, k590, k408, k703, k513, k559, k708, k262, k521, k677, k412]	5.68
k591	H2CCO + R	H2O + C2	626.47	6.82e-02	s^-1	Group 125	[k372, k267, k226, k445, k591, k312, k344]	4.00
k592	HCCOH + R	H2O + C2	485.82	7.29e-01	s^-1	Group 131	[k373, k268, k228, k447, k592, k314, k345]	26.96
k593	CH2CHOH + R	H2O + CHCH	103.37	2.57e-01	s^-1	Group 33	[k529, k269, k593, k272, k423, k374, k449, k565, k316, k346, k349]	5.41
k594	CH2OCH2 + R	H2O + CHCH	29.96	4.81e-01	s^-1	Group 34	[k530, k270, k594, k273, k424, k375, k451, k566, k317, k347, k350]	10.36
k595	CH3CHO + R	H2O + CHCH	145.02	7.17e-01	s^-1	Group 45	[k531, k271, k595, k274, k425, k376, k453, k567, k318, k348, k351]	16.78
k596	CH2OO + R	H2O + CO	-362.1	2.08e-01	s^-1	Group 37	[k275, k596, k232, k570, k459, k379, k321, k354]	7.58
k597	HCOOH + R	H2O + CO	18.36	1.01e-08	s^-1	Group 134	[k276, k597, k234, k571, k461, k380, k323, k355]	0.01
k598	H2CO2 + R	H2O + CO	-464.64	5.47e-01	s^-1	Group 127	[k277, k598, k236, k572, k463, k381, k325, k356]	12.78
k599	CH3CH2OH + R	H2O + CH2CH2	39.32	2.73e-01	s^-1	Group 43	[k599, k533, k282, k278, k280, k427, k573, k238, k465, k429, k382]	9.88
k600	CH3OCH3 + R	H2O + CH2CH2	-11.49	2.92e-01	s^-1	Group 52	[k600, k534, k283, k279, k281, k428, k574, k240, k467, k430, k383]	7.59
k601	CH2OHOH + R	H2O + H2CO	34.89	6.06e-01	s^-1	Group 36	[k286, k601, k535, k284, k575, k469, k577, k288, k431, k384]	15.32
k602	CH3OOH + R	H2O + H2CO	-229.4	7.51e-01	s^-1	Group 56	[k287, k602, k536, k285, k576, k471, k578, k289, k432, k385]	14.01
k603	CH3COCH2 + R	H2O + C3H3	133.65	3.24e-01	s^-1	Group 47	[k639, k652, k433, k537, k603, k630, k621, k579, k434, k622, k473, k360, k358, k359, k329]	5.27
k604	CH3COCH3 + R	H2O + C3H4	153.77	4.20e-01	s^-1	Group 48	[k640, k538, k604, k653, k539, k623, k666, k242, k580, k388, k386, k631, k632, k387, k330, k331, k361]	4.89
k605	H2CO3 + R	H2O + CO2	-29.68	7.14e-01	s^-1	Group 128	[k605, k254, k648, k292, k681, k669, k404]	21.79
k606	CH3CHOHOH + R	H2O + CH2CHOH	0.42	5.26e-01	s^-1	Group 46	[k552, k293, k614, k606, k297, k301, k682, k610, k305, k660, k689, k548, k696, k587, k405, k700, k507, k556, k705, k256, k515, k674, k409]	6.62
k607	CH3OCH2OH + R	H2O + CH2CHOH	-54.04	5.82e-01	s^-1	Group 51	[k553, k294, k615, k607, k298, k302, k683, k611, k306, k661, k690, k549, k697, k588, k406, k701, k509, k557, k706, k258, k517, k675, k410]	5.24
k608	CH3OOCH3 + R	H2O + CH2CHOH	-277.25	7.30e-01	s^-1	Group 55	[k554, k295, k616, k608, k299, k303, k684, k612, k307, k662, k691, k550, k698, k589, k407, k702, k511, k558, k707, k260, k519, k676, k411]	5.78
k609	HOCH2CH2OH + R	H2O + CH2CHOH	17.39	3.10e-01	s^-1	Group 136	[k555, k296, k617, k609, k300, k304, k685, k613, k308, k663, k692, k551, k699, k590, k408, k703, k513, k559, k708, k262, k521, k677, k412]	2.67
k610	CH3CHOHOH + R	H2O + CH2OCH2	73.83	1.81e-01	s^-1	Group 46	[k552, k293, k614, k606, k297, k301, k682, k610, k305, k660, k689, k548, k696, k587, k405, k700, k507, k556, k705, k256, k515, k674, k409]	2.28
k611	CH3OCH2OH + R	H2O + CH2OCH2	19.37	1.23e-01	s^-1	Group 51	[k553, k294, k615, k607, k298, k302, k683, k611, k306, k661, k690, k549, k697, k588, k406, k701, k509, k557, k706, k258, k517, k675, k410]	1.11
k612	CH3OOCH3 + R	H2O + CH2OCH2	-203.84	7.35e-01	s^-1	Group 55	[k554, k295, k616, k608, k299, k303, k684, k612, k307, k662, k691, k550, k698, k589, k407, k702, k511, k558, k707, k260, k519, k676, k411]	5.82
k613	HOCH2CH2OH + R	H2O + CH2OCH2	90.8	5.58e-01	s^-1	Group 136	[k555, k296, k617, k609, k300, k304, k685, k613, k308, k663, k692, k551, k699, k590, k408, k703, k513, k559, k708, k262, k521, k677, k412]	4.81
k614	CH3CHOHOH + R	H2O + CH3CHO	-41.23	5.83e-02	s^-1	Group 46	[k552, k293, k614, k606, k297, k301, k682, k610, k305, k660, k689, k548, k696, k587, k405, k700, k507, k556, k705, k256, k515, k674, k409]	0.73
k615	CH3OCH2OH + R	H2O + CH3CHO	-95.69	4.18e-01	s^-1	Group 51	[k553, k294, k615, k607, k298, k302, k683, k611, k306, k661, k690, k549, k697, k588, k406, k701, k509, k557, k706, k258, k517, k675, k410]	3.76
k616	CH3OOCH3 + R	H2O + CH3CHO	-318.9	3.22e-01	s^-1	Group 55	[k554, k295, k616, k608, k299, k303, k684, k612, k307, k662, k691, k550, k698, k589, k407, k702, k511, k558, k707, k260, k519, k676, k411]	2.55
k617	HOCH2CH2OH + R	H2O + CH3CHO	-24.26	5.84e-01	s^-1	Group 136	[k555, k296, k617, k609, k300, k304, k685, k613, k308, k663, k692, k551, k699, k590, k408, k703, k513, k559, k708, k262, k521, k677, k412]	5.04
k618	OHCCOOH + R	H2O + C2O2	192.61	6.64e-01	s^-1	Group 200	[k686, k650, k309, k618, k670, k368, k649, k710, k651, k711, k340, k716, k413, k717, k629]	9.80
k619	CH3CH2CHOHOH + R	H2O + CH3COCH3	-78.31	6.68e-01	s^-1	Group 42	[k560, k694, k619, k561, k562, k715, k563, k687, k664, k713, k688, k714, k712, k693, k665, k704, k709, k523, k444, k527, k417, k414, k695, k525, k415, k416]	5.48
k620	C3OH + R	C2 + HCO	571.08	8.63e-03	s^-1	Group 29	[k620, k327, k357]	40.36
k621	CH3COCH2 + R	CHCH + CH2OH	237.0	7.94e-01	s^-1	Group 47	[k639, k652, k433, k537, k603, k630, k621, k579, k434, k622, k473, k360, k358, k359, k329]	12.91
k622	CH3COCH2 + R	CHCH + CH3O	276.29	6.85e-01	s^-1	Group 47	[k639, k652, k433, k537, k603, k630, k621, k579, k434, k622, k473, k360, k358, k359, k329]	11.14
k623	CH3COCH3 + R	CHCH + CH3OH	238.83	6.66e-01	s^-1	Group 48	[k640, k538, k604, k653, k539, k623, k666, k242, k580, k388, k386, k631, k632, k387, k330, k331, k361]	7.75
k624	C2H3O2 + R	CHCH + HO2	470.72	6.90e-01	s^-1	Group 18	[k435, k641, k642, k581, k582, k389, k363, k624, k633, k362, k364]	11.89
k625	CH3COOH + R	CHCH + H2O2	518.0	3.34e-01	s^-1	Group 49	[k540, k643, k436, k394, k654, k491, k625, k475, k483, k634, k332, k390, k398, k336]	6.87
k626	HCOOCH3 + R	CHCH + H2O2	446.41	4.69e-01	s^-1	Group 133	[k541, k644, k437, k395, k655, k493, k626, k477, k485, k635, k333, k391, k399, k337]	8.54
k627	OHCH2CHO + R	CHCH + H2O2	403.94	8.32e-01	s^-1	Group 201	[k542, k645, k438, k396, k656, k495, k627, k479, k487, k636, k334, k392, k400, k338]	11.12
k628	OHCHCHOH + R	CHCH + H2O2	372.28	4.69e-01	s^-1	Group 202	[k543, k646, k439, k397, k657, k497, k628, k481, k489, k637, k335, k393, k401, k339]	5.76
k629	OHCCOOH + R	CHCH + O3	790.28	2.96e-03	s^-1	Group 200	[k686, k650, k309, k618, k670, k368, k649, k710, k651, k711, k340, k716, k413, k717, k629]	0.04
k630	CH3COCH2 + R	C2H3 + H2CO	214.37	6.08e-01	s^-1	Group 47	[k639, k652, k433, k537, k603, k630, k621, k579, k434, k622, k473, k360, k358, k359, k329]	9.89
k631	CH3COCH3 + R	C2H3 + CH2OH	490.88	3.40e-01	s^-1	Group 48	[k640, k538, k604, k653, k539, k623, k666, k242, k580, k388, k386, k631, k632, k387, k330, k331, k361]	3.96
k632	CH3COCH3 + R	C2H3 + CH3O	530.17	2.15e-01	s^-1	Group 48	[k640, k538, k604, k653, k539, k623, k666, k242, k580, k388, k386, k631, k632, k387, k330, k331, k361]	2.50
k633	C2H3O2 + R	C2H3 + O2	527.96	3.66e-01	s^-1	Group 18	[k435, k641, k642, k581, k582, k389, k363, k624, k633, k362, k364]	6.31
k634	CH3COOH + R	C2H3 + HO2	734.93	4.36e-03	s^-1	Group 49	[k540, k643, k436, k394, k654, k491, k625, k475, k483, k634, k332, k390, k398, k336]	0.09
k635	HCOOCH3 + R	C2H3 + HO2	663.34	7.39e-01	s^-1	Group 133	[k541, k644, k437, k395, k655, k493, k626, k477, k485, k635, k333, k391, k399, k337]	13.46
k636	OHCH2CHO + R	C2H3 + HO2	620.87	8.13e-01	s^-1	Group 201	[k542, k645, k438, k396, k656, k495, k627, k479, k487, k636, k334, k392, k400, k338]	10.86
k637	OHCHCHOH + R	C2H3 + HO2	589.21	2.67e-01	s^-1	Group 202	[k543, k646, k439, k397, k657, k497, k628, k481, k489, k637, k335, k393, k401, k339]	3.28
k638	CH3OCHOH + R	C2H3 + H2O2	315.94	8.44e-01	s^-1	Group 53	[k547, k291, k442, k246, k668, k248, k586, k679, k250, k680, k584, k252, k585, k659, k673, k441, k638, k505, k366, k443, k367]	6.87
k639	CH3COCH2 + R	CO + C2H5	36.07	2.71e-01	s^-1	Group 47	[k639, k652, k433, k537, k603, k630, k621, k579, k434, k622, k473, k360, k358, k359, k329]	4.41
k640	CH3COCH3 + R	CO + CH3CH3	17.8	8.42e-01	s^-1	Group 48	[k640, k538, k604, k653, k539, k623, k666, k242, k580, k388, k386, k631, k632, k387, k330, k331, k361]	9.80
k641	C2H3O2 + R	CO + CH2OH	102.53	1.86e-01	s^-1	Group 18	[k435, k641, k642, k581, k582, k389, k363, k624, k633, k362, k364]	3.20
k642	C2H3O2 + R	CO + CH3O	141.82	6.00e-01	s^-1	Group 18	[k435, k641, k642, k581, k582, k389, k363, k624, k633, k362, k364]	10.34
k643	CH3COOH + R	CO + CH3OH	114.69	5.80e-01	s^-1	Group 49	[k540, k643, k436, k394, k654, k491, k625, k475, k483, k634, k332, k390, k398, k336]	11.93
k644	HCOOCH3 + R	CO + CH3OH	43.1	2.67e-01	s^-1	Group 133	[k541, k644, k437, k395, k655, k493, k626, k477, k485, k635, k333, k391, k399, k337]	4.86
k645	OHCH2CHO + R	CO + CH3OH	0.63	5.93e-01	s^-1	Group 201	[k542, k645, k438, k396, k656, k495, k627, k479, k487, k636, k334, k392, k400, k338]	7.92
k646	OHCHCHOH + R	CO + CH3OH	-31.03	8.08e-01	s^-1	Group 202	[k543, k646, k439, k397, k657, k497, k628, k481, k489, k637, k335, k393, k401, k339]	9.92
k647	HCO3 + R	CO + HO2	620.64	6.25e-01	s^-1	Group 132	[k583, k647, k667, k244, k503, k365]	34.23
k648	H2CO3 + R	CO + H2O2	359.11	6.74e-01	s^-1	Group 128	[k605, k254, k648, k292, k681, k669, k404]	20.57
k649	OHCCOOH + R	CO + CH2OO	312.61	4.27e-01	s^-1	Group 200	[k686, k650, k309, k618, k670, k368, k649, k710, k651, k711, k340, k716, k413, k717, k629]	6.30
k650	OHCCOOH + R	CO + HCOOH	-67.85	3.60e-01	s^-1	Group 200	[k686, k650, k309, k618, k670, k368, k649, k710, k651, k711, k340, k716, k413, k717, k629]	5.32
k651	OHCCOOH + R	CO + H2CO2	415.15	5.53e-01	s^-1	Group 200	[k686, k650, k309, k618, k670, k368, k649, k710, k651, k711, k340, k716, k413, k717, k629]	8.16
k652	CH3COCH2 + R	CH2CH2 + HCO	120.76	3.86e-01	s^-1	Group 47	[k639, k652, k433, k537, k603, k630, k621, k579, k434, k622, k473, k360, k358, k359, k329]	6.28
k653	CH3COCH3 + R	CH2CH2 + H2CO	155.5	7.26e-01	s^-1	Group 48	[k640, k538, k604, k653, k539, k623, k666, k242, k580, k388, k386, k631, k632, k387, k330, k331, k361]	8.45
k654	CH3COOH + R	CH2CH2 + O2	479.42	8.41e-01	s^-1	Group 49	[k540, k643, k436, k394, k654, k491, k625, k475, k483, k634, k332, k390, k398, k336]	17.30
k655	HCOOCH3 + R	CH2CH2 + O2	407.83	8.41e-01	s^-1	Group 133	[k541, k644, k437, k395, k655, k493, k626, k477, k485, k635, k333, k391, k399, k337]	15.32
k656	OHCH2CHO + R	CH2CH2 + O2	365.36	7.69e-01	s^-1	Group 201	[k542, k645, k438, k396, k656, k495, k627, k479, k487, k636, k334, k392, k400, k338]	10.28
k657	OHCHCHOH + R	CH2CH2 + O2	333.7	8.44e-01	s^-1	Group 202	[k543, k646, k439, k397, k657, k497, k628, k481, k489, k637, k335, k393, k401, k339]	10.37
k658	CH3CH2CH2OH + R	CH2CH2 + CH3OH	102.11	8.02e-01	s^-1	Group 40	[k546, k290, k544, k678, k658, k545, k440, k671, k672, k402, k403]	20.65
k659	CH3OCHOH + R	CH2CH2 + HO2	220.12	5.15e-01	s^-1	Group 53	[k547, k291, k442, k246, k668, k248, k586, k679, k250, k680, k584, k252, k585, k659, k673, k441, k638, k505, k366, k443, k367]	4.19
k660	CH3CHOHOH + R	CH2CH2 + H2O2	284.17	2.12e-01	s^-1	Group 46	[k552, k293, k614, k606, k297, k301, k682, k610, k305, k660, k689, k548, k696, k587, k405, k700, k507, k556, k705, k256, k515, k674, k409]	2.67
k661	CH3OCH2OH + R	CH2CH2 + H2O2	229.71	8.21e-01	s^-1	Group 51	[k553, k294, k615, k607, k298, k302, k683, k611, k306, k661, k690, k549, k697, k588, k406, k701, k509, k557, k706, k258, k517, k675, k410]	7.39
k662	CH3OOCH3 + R	CH2CH2 + H2O2	6.5	8.25e-01	s^-1	Group 55	[k554, k295, k616, k608, k299, k303, k684, k612, k307, k662, k691, k550, k698, k589, k407, k702, k511, k558, k707, k260, k519, k676, k411]	6.54
k663	HOCH2CH2OH + R	CH2CH2 + H2O2	301.14	7.90e-01	s^-1	Group 136	[k555, k296, k617, k609, k300, k304, k685, k613, k308, k663, k692, k551, k699, k590, k408, k703, k513, k559, k708, k262, k521, k677, k412]	6.81
k664	CH3CH2CHOHOH + R	CH2CH2 + CH2OHOH	42.3	8.00e-01	s^-1	Group 42	[k560, k694, k619, k561, k562, k715, k563, k687, k664, k713, k688, k714, k712, k693, k665, k704, k709, k523, k444, k527, k417, k414, k695, k525, k415, k416]	6.57
k665	CH3CH2CHOHOH + R	CH2CH2 + CH3OOH	306.59	6.61e-01	s^-1	Group 42	[k560, k694, k619, k561, k562, k715, k563, k687, k664, k713, k688, k714, k712, k693, k665, k704, k709, k523, k444, k527, k417, k414, k695, k525, k415, k416]	5.43
k666	CH3COCH3 + R	HCO + C2H5	372.75	5.87e-01	s^-1	Group 48	[k640, k538, k604, k653, k539, k623, k666, k242, k580, k388, k386, k631, k632, k387, k330, k331, k361]	6.83
k667	HCO3 + R	HCO + O2	760.68	1.11e-01	s^-1	Group 132	[k583, k647, k667, k244, k503, k365]	6.08
k668	CH3OCHOH + R	HCO + CH3OH	-4.57	7.66e-01	s^-1	Group 53	[k547, k291, k442, k246, k668, k248, k586, k679, k250, k680, k584, k252, k585, k659, k673, k441, k638, k505, k366, k443, k367]	6.24
k669	H2CO3 + R	HCO + HO2	658.84	9.67e-02	s^-1	Group 128	[k605, k254, k648, k292, k681, k669, k404]	2.95
k670	OHCCOOH + R	HCO + HOCO	277.2	1.74e-01	s^-1	Group 200	[k686, k650, k309, k618, k670, k368, k649, k710, k651, k711, k340, k716, k413, k717, k629]	2.57
k671	CH3CH2CH2OH + R	C2H5 + CH2OH	352.27	1.53e-01	s^-1	Group 40	[k546, k290, k544, k678, k658, k545, k440, k671, k672, k402, k403]	3.94
k672	CH3CH2CH2OH + R	C2H5 + CH3O	391.56	2.01e-01	s^-1	Group 40	[k546, k290, k544, k678, k658, k545, k440, k671, k672, k402, k403]	5.18
k673	CH3OCHOH + R	C2H5 + O2	275.47	5.49e-01	s^-1	Group 53	[k547, k291, k442, k246, k668, k248, k586, k679, k250, k680, k584, k252, k585, k659, k673, k441, k638, k505, k366, k443, k367]	4.47
k674	CH3CHOHOH + R	C2H5 + HO2	499.21	1.39e-01	s^-1	Group 46	[k552, k293, k614, k606, k297, k301, k682, k610, k305, k660, k689, k548, k696, k587, k405, k700, k507, k556, k705, k256, k515, k674, k409]	1.75
k675	CH3OCH2OH + R	C2H5 + HO2	444.75	1.61e-03	s^-1	Group 51	[k553, k294, k615, k607, k298, k302, k683, k611, k306, k661, k690, k549, k697, k588, k406, k701, k509, k557, k706, k258, k517, k675, k410]	0.01
k676	CH3OOCH3 + R	C2H5 + HO2	221.54	2.54e-03	s^-1	Group 55	[k554, k295, k616, k608, k299, k303, k684, k612, k307, k662, k691, k550, k698, k589, k407, k702, k511, k558, k707, k260, k519, k676, k411]	0.02
k677	HOCH2CH2OH + R	C2H5 + HO2	516.18	2.61e-01	s^-1	Group 136	[k555, k296, k617, k609, k300, k304, k685, k613, k308, k663, k692, k551, k699, k590, k408, k703, k513, k559, k708, k262, k521, k677, k412]	2.25
k678	CH3CH2CH2OH + R	H2CO + CH3CH3	57.49	2.86e-01	s^-1	Group 40	[k546, k290, k544, k678, k658, k545, k440, k671, k672, k402, k403]	7.36
k679	CH3OCHOH + R	H2CO + CH2OH	28.34	8.42e-01	s^-1	Group 53	[k547, k291, k442, k246, k668, k248, k586, k679, k250, k680, k584, k252, k585, k659, k673, k441, k638, k505, k366, k443, k367]	6.86
k680	CH3OCHOH + R	H2CO + CH3O	67.63	1.83e-01	s^-1	Group 53	[k547, k291, k442, k246, k668, k248, k586, k679, k250, k680, k584, k252, k585, k659, k673, k441, k638, k505, k366, k443, k367]	1.49
k681	H2CO3 + R	H2CO + O2	496.94	3.79e-01	s^-1	Group 128	[k605, k254, k648, k292, k681, k669, k404]	11.57
k682	CH3CHOHOH + R	H2CO + CH3OH	57.27	7.02e-01	s^-1	Group 46	[k552, k293, k614, k606, k297, k301, k682, k610, k305, k660, k689, k548, k696, k587, k405, k700, k507, k556, k705, k256, k515, k674, k409]	8.83
k683	CH3OCH2OH + R	H2CO + CH3OH	2.81	4.50e-01	s^-1	Group 51	[k553, k294, k615, k607, k298, k302, k683, k611, k306, k661, k690, k549, k697, k588, k406, k701, k509, k557, k706, k258, k517, k675, k410]	4.05
k684	CH3OOCH3 + R	H2CO + CH3OH	-220.4	8.08e-01	s^-1	Group 55	[k554, k295, k616, k608, k299, k303, k684, k612, k307, k662, k691, k550, k698, k589, k407, k702, k511, k558, k707, k260, k519, k676, k411]	6.40
k685	HOCH2CH2OH + R	H2CO + CH3OH	74.24	4.63e-01	s^-1	Group 136	[k555, k296, k617, k609, k300, k304, k685, k613, k308, k663, k692, k551, k699, k590, k408, k703, k513, k559, k708, k262, k521, k677, k412]	3.99
k686	OHCCOOH + R	H2CO + CO2	-81.49	2.28e-01	s^-1	Group 200	[k686, k650, k309, k618, k670, k368, k649, k710, k651, k711, k340, k716, k413, k717, k629]	3.37
k687	CH3CH2CHOHOH + R	H2CO + CH3CH2OH	37.87	2.63e-01	s^-1	Group 42	[k560, k694, k619, k561, k562, k715, k563, k687, k664, k713, k688, k714, k712, k693, k665, k704, k709, k523, k444, k527, k417, k414, k695, k525, k415, k416]	2.16
k688	CH3CH2CHOHOH + R	H2CO + CH3OCH3	88.68	8.08e-01	s^-1	Group 42	[k560, k694, k619, k561, k562, k715, k563, k687, k664, k713, k688, k714, k712, k693, k665, k704, k709, k523, k444, k527, k417, k414, k695, k525, k415, k416]	6.63
k689	CH3CHOHOH + R	CH3CH3 + O2	284.3	3.73e-01	s^-1	Group 46	[k552, k293, k614, k606, k297, k301, k682, k610, k305, k660, k689, k548, k696, k587, k405, k700, k507, k556, k705, k256, k515, k674, k409]	4.69
k690	CH3OCH2OH + R	CH3CH3 + O2	229.84	1.62e-01	s^-1	Group 51	[k553, k294, k615, k607, k298, k302, k683, k611, k306, k661, k690, k549, k697, k588, k406, k701, k509, k557, k706, k258, k517, k675, k410]	1.46
k691	CH3OOCH3 + R	CH3CH3 + O2	6.63	4.37e-01	s^-1	Group 55	[k554, k295, k616, k608, k299, k303, k684, k612, k307, k662, k691, k550, k698, k589, k407, k702, k511, k558, k707, k260, k519, k676, k411]	3.46
k692	HOCH2CH2OH + R	CH3CH3 + O2	301.27	6.12e-01	s^-1	Group 136	[k555, k296, k617, k609, k300, k304, k685, k613, k308, k663, k692, k551, k699, k590, k408, k703, k513, k559, k708, k262, k521, k677, k412]	5.28
k693	CH3CH2CHOHOH + R	CH3CH3 + CH2OO	301.59	4.67e-01	s^-1	Group 42	[k560, k694, k619, k561, k562, k715, k563, k687, k664, k713, k688, k714, k712, k693, k665, k704, k709, k523, k444, k527, k417, k414, k695, k525, k415, k416]	3.83
k694	CH3CH2CHOHOH + R	CH3CH3 + HCOOH	-78.87	4.01e-01	s^-1	Group 42	[k560, k694, k619, k561, k562, k715, k563, k687, k664, k713, k688, k714, k712, k693, k665, k704, k709, k523, k444, k527, k417, k414, k695, k525, k415, k416]	3.29
k695	CH3CH2CHOHOH + R	CH3CH3 + H2CO2	404.13	1.20e-01	s^-1	Group 42	[k560, k694, k619, k561, k562, k715, k563, k687, k664, k713, k688, k714, k712, k693, k665, k704, k709, k523, k444, k527, k417, k414, k695, k525, k415, k416]	0.99
k696	CH3CHOHOH + R	CH2OH + CH2OH	331.95	7.03e-01	s^-1	Group 46	[k552, k293, k614, k606, k297, k301, k682, k610, k305, k660, k689, k548, k696, k587, k405, k700, k507, k556, k705, k256, k515, k674, k409]	8.84
k697	CH3OCH2OH + R	CH2OH + CH2OH	277.49	7.68e-01	s^-1	Group 51	[k553, k294, k615, k607, k298, k302, k683, k611, k306, k661, k690, k549, k697, k588, k406, k701, k509, k557, k706, k258, k517, k675, k410]	6.91
k698	CH3OOCH3 + R	CH2OH + CH2OH	54.28	7.16e-01	s^-1	Group 55	[k554, k295, k616, k608, k299, k303, k684, k612, k307, k662, k691, k550, k698, k589, k407, k702, k511, k558, k707, k260, k519, k676, k411]	5.67
k699	HOCH2CH2OH + R	CH2OH + CH2OH	348.92	5.35e-01	s^-1	Group 136	[k555, k296, k617, k609, k300, k304, k685, k613, k308, k663, k692, k551, k699, k590, k408, k703, k513, k559, k708, k262, k521, k677, k412]	4.61
k700	CH3CHOHOH + R	CH2OH + CH3O	371.24	1.63e-01	s^-1	Group 46	[k552, k293, k614, k606, k297, k301, k682, k610, k305, k660, k689, k548, k696, k587, k405, k700, k507, k556, k705, k256, k515, k674, k409]	2.05
k701	CH3OCH2OH + R	CH2OH + CH3O	316.78	8.24e-01	s^-1	Group 51	[k553, k294, k615, k607, k298, k302, k683, k611, k306, k661, k690, k549, k697, k588, k406, k701, k509, k557, k706, k258, k517, k675, k410]	7.42
k702	CH3OOCH3 + R	CH2OH + CH3O	93.57	5.09e-01	s^-1	Group 55	[k554, k295, k616, k608, k299, k303, k684, k612, k307, k662, k691, k550, k698, k589, k407, k702, k511, k558, k707, k260, k519, k676, k411]	4.03
k703	HOCH2CH2OH + R	CH2OH + CH3O	388.21	2.60e-01	s^-1	Group 136	[k555, k296, k617, k609, k300, k304, k685, k613, k308, k663, k692, k551, k699, k590, k408, k703, k513, k559, k708, k262, k521, k677, k412]	2.24
k704	CH3CH2CHOHOH + R	CH2OH + HOCHCH3	307.34	3.03e-01	s^-1	Group 42	[k560, k694, k619, k561, k562, k715, k563, k687, k664, k713, k688, k714, k712, k693, k665, k704, k709, k523, k444, k527, k417, k414, k695, k525, k415, k416]	2.49
k705	CH3CHOHOH + R	CH3O + CH3O	410.53	1.65e-01	s^-1	Group 46	[k552, k293, k614, k606, k297, k301, k682, k610, k305, k660, k689, k548, k696, k587, k405, k700, k507, k556, k705, k256, k515, k674, k409]	2.08
k706	CH3OCH2OH + R	CH3O + CH3O	356.07	1.53e-01	s^-1	Group 51	[k553, k294, k615, k607, k298, k302, k683, k611, k306, k661, k690, k549, k697, k588, k406, k701, k509, k557, k706, k258, k517, k675, k410]	1.38
k707	CH3OOCH3 + R	CH3O + CH3O	132.86	7.31e-01	s^-1	Group 55	[k554, k295, k616, k608, k299, k303, k684, k612, k307, k662, k691, k550, k698, k589, k407, k702, k511, k558, k707, k260, k519, k676, k411]	5.79
k708	HOCH2CH2OH + R	CH3O + CH3O	427.5	5.13e-01	s^-1	Group 136	[k555, k296, k617, k609, k300, k304, k685, k613, k308, k663, k692, k551, k699, k590, k408, k703, k513, k559, k708, k262, k521, k677, k412]	4.42
k709	CH3CH2CHOHOH + R	CH3O + HOCHCH3	346.63	5.35e-01	s^-1	Group 42	[k560, k694, k619, k561, k562, k715, k563, k687, k664, k713, k688, k714, k712, k693, k665, k704, k709, k523, k444, k527, k417, k414, k695, k525, k415, k416]	4.39
k710	OHCCOOH + R	O2 + H2CCO	371.64	7.94e-01	s^-1	Group 200	[k686, k650, k309, k618, k670, k368, k649, k710, k651, k711, k340, k716, k413, k717, k629]	11.72
k711	OHCCOOH + R	O2 + HCCOH	512.29	5.31e-01	s^-1	Group 200	[k686, k650, k309, k618, k670, k368, k649, k710, k651, k711, k340, k716, k413, k717, k629]	7.84
k712	CH3CH2CHOHOH + R	O2 + CH3CH2CH3	277.85	7.06e-01	s^-1	Group 42	[k560, k694, k619, k561, k562, k715, k563, k687, k664, k713, k688, k714, k712, k693, k665, k704, k709, k523, k444, k527, k417, k414, k695, k525, k415, k416]	5.80
k713	CH3CH2CHOHOH + R	CH3OH + CH2CHOH	57.15	7.69e-01	s^-1	Group 42	[k560, k694, k619, k561, k562, k715, k563, k687, k664, k713, k688, k714, k712, k693, k665, k704, k709, k523, k444, k527, k417, k414, k695, k525, k415, k416]	6.31
k714	CH3CH2CHOHOH + R	CH3OH + CH2OCH2	130.56	7.23e-01	s^-1	Group 42	[k560, k694, k619, k561, k562, k715, k563, k687, k664, k713, k688, k714, k712, k693, k665, k704, k709, k523, k444, k527, k417, k414, k695, k525, k415, k416]	5.94
k715	CH3CH2CHOHOH + R	CH3OH + CH3CHO	15.5	5.33e-01	s^-1	Group 42	[k560, k694, k619, k561, k562, k715, k563, k687, k664, k713, k688, k714, k712, k693, k665, k704, k709, k523, k444, k527, k417, k414, k695, k525, k415, k416]	4.38
k716	OHCCOOH + R	HO2 + C2OH	609.2	7.41e-01	s^-1	Group 200	[k686, k650, k309, k618, k670, k368, k649, k710, k651, k711, k340, k716, k413, k717, k629]	10.94
k717	OHCCOOH + R	H2O2 + C2O	664.71	4.86e-01	s^-1	Group 200	[k686, k650, k309, k618, k670, k368, k649, k710, k651, k711, k340, k716, k413, k717, k629]	7.18
k718	H + HCO	H2 + CO	-371.21	1.41e-23	cm^3 molecules^-1 s^-1	Group 108	[k718, k221]	99.04
k719	H + H2CO	H2 + HCO	-69.27	2.69e-24	cm^3 molecules^-1 s^-1	Group 103	[k223, k225, k719]	3.49
k720	CH3 + O	H + H2CO	-286.06	1.23e-23	cm^3 molecules^-1 s^-1	Group 38	[k419, k421, k1015, k720, k1080, k1097]	11.84
k721	H + CH2OH	H + CH3O	39.29	2.13e-25	cm^3 molecules^-1 s^-1	Group 77	[k723, k724, k721]	21.96
k722	H + CH3O	H + CH2OH	-39.29	2.24e-28	cm^3 molecules^-1 s^-1	Group 92	[k726, k727, k722]	0.00
k723	H + CH2OH	H2 + H2CO	-311.04	5.56e-25	cm^3 molecules^-1 s^-1	Group 77	[k723, k724, k721]	57.32
k724	H + CH2OH	O + CH4	-25.37	2.01e-25	cm^3 molecules^-1 s^-1	Group 77	[k723, k724, k721]	20.72
k725	O + CH4	H + CH2OH	25.37	1.43e-23	cm^3 molecules^-1 s^-1	Group 178	[k1016, k725, k728]	20.79
k726	H + CH3O	H2 + H2CO	-350.33	3.64e-23	cm^3 molecules^-1 s^-1	Group 92	[k726, k727, k722]	61.80
k727	H + CH3O	O + CH4	-64.66	2.25e-23	cm^3 molecules^-1 s^-1	Group 92	[k726, k727, k722]	38.20
k728	O + CH4	H + CH3O	64.66	2.08e-24	cm^3 molecules^-1 s^-1	Group 178	[k1016, k725, k728]	3.02
k729	H + CH3OH	H2 + CH2OH	-36.36	7.07e-26	cm^3 molecules^-1 s^-1	Group 97	[k731, k732, k729, k730]	0.17
k730	H + CH3OH	H2 + CH3O	2.93	2.19e-26	cm^3 molecules^-1 s^-1	Group 97	[k731, k732, k729, k730]	0.05
k731	H + CH3OH	CH3 + H2O	-115.01	1.63e-23	cm^3 molecules^-1 s^-1	Group 97	[k731, k732, k729, k730]	39.00
k732	H + CH3OH	CH4 + OH	-55.26	2.54e-23	cm^3 molecules^-1 s^-1	Group 97	[k731, k732, k729, k730]	60.78
k733	H + C2OH	H2 + C2O	-15.97	5.24e-23	cm^3 molecules^-1 s^-1	Group 67	[k227, k229, k735, k733, k736, k738]	28.37
k734	C + H2CO	H + C2OH	-212.93	4.69e-23	cm^3 molecules^-1 s^-1	Group 9	[k313, k315, k1057, k1017, k734, k1058, k1060, k1056]	16.47
k735	H + C2OH	CH2 + CO	-115.84	4.26e-23	cm^3 molecules^-1 s^-1	Group 67	[k227, k229, k735, k733, k736, k738]	23.06
k736	H + C2OH	O + CHCH	82.63	2.71e-23	cm^3 molecules^-1 s^-1	Group 67	[k227, k229, k735, k733, k736, k738]	14.67
k737	O + CHCH	H + C2OH	-82.63	4.55e-23	cm^3 molecules^-1 s^-1	Group 179	[k446, k448, k1098, k1018, k737, k1154, k1059, k1081]	20.68
k738	H + C2OH	H2O + C2	188.02	1.21e-24	cm^3 molecules^-1 s^-1	Group 67	[k227, k229, k735, k733, k736, k738]	0.66
k739	H + H2CCO	H + HCCOH	140.65	1.12e-24	cm^3 molecules^-1 s^-1	Group 102	[k742, k741, k744, k739]	1.60
k740	H + HCCOH	H + H2CCO	-140.65	5.09e-23	cm^3 molecules^-1 s^-1	Group 107	[k748, k740, k745, k750, k747, k746]	42.00
k741	H + H2CCO	H2 + C2OH	6.39	2.46e-23	cm^3 molecules^-1 s^-1	Group 102	[k742, k741, k744, k739]	35.22
k742	H + H2CCO	CH3 + CO	-134.6	3.59e-23	cm^3 molecules^-1 s^-1	Group 102	[k742, k741, k744, k739]	51.40
k743	O + C2H3	H + H2CCO	-377.43	4.46e-23	cm^3 molecules^-1 s^-1	Group 140	[k1131, k743, k1019, k1155, k749, k1099, k1082, k1061, k1062]	27.24
k744	H + H2CCO	OH + CHCH	95.49	8.23e-24	cm^3 molecules^-1 s^-1	Group 102	[k742, k741, k744, k739]	11.78
k745	H + HCCOH	H2 + C2OH	-134.26	3.15e-23	cm^3 molecules^-1 s^-1	Group 107	[k748, k740, k745, k750, k747, k746]	25.99
k746	H + HCCOH	CH + H2CO	176.13	1.42e-25	cm^3 molecules^-1 s^-1	Group 107	[k748, k740, k745, k750, k747, k746]	0.12
k747	H + HCCOH	CH2 + HCO	121.11	1.71e-24	cm^3 molecules^-1 s^-1	Group 107	[k748, k740, k745, k750, k747, k746]	1.41
k748	H + HCCOH	CH3 + CO	-275.25	2.80e-23	cm^3 molecules^-1 s^-1	Group 107	[k748, k740, k745, k750, k747, k746]	23.10
k749	O + C2H3	H + HCCOH	-236.78	2.21e-23	cm^3 molecules^-1 s^-1	Group 140	[k1131, k743, k1019, k1155, k749, k1099, k1082, k1061, k1062]	13.50
k750	H + HCCOH	OH + CHCH	-45.16	8.94e-24	cm^3 molecules^-1 s^-1	Group 107	[k748, k740, k745, k750, k747, k746]	7.38
k751	C + HO2	H + CO2	-903.62	3.17e-23	cm^3 molecules^-1 s^-1	Group 13	[k320, k751, k1065, k1064, k1063]	23.50
k752	O + HCO	H + CO2	-465.3	1.27e-25	cm^3 molecules^-1 s^-1	Group 189	[k456, k752, k1159]	0.52
k753	H + CO2	OH + CO	100.56	7.51e-26	cm^3 molecules^-1 s^-1	Group 100	[k231, k753]	1.07
k754	H + CH2CHOH	H + CH2OCH2	73.41	1.42e-24	cm^3 molecules^-1 s^-1	Group 75	[k756, k758, k754]	43.35
k755	H + CH2OCH2	H + CH2CHOH	-73.41	1.26e-25	cm^3 molecules^-1 s^-1	Group 76	[k759, k761, k755]	0.28
k756	H + CH2CHOH	H + CH3CHO	-41.65	6.36e-25	cm^3 molecules^-1 s^-1	Group 75	[k756, k758, k754]	19.41
k757	H + CH3CHO	H + CH2CHOH	41.65	1.10e-23	cm^3 molecules^-1 s^-1	Group 86	[k762, k757, k760]	27.83
k758	H + CH2CHOH	H2O + C2H3	-40.28	1.22e-24	cm^3 molecules^-1 s^-1	Group 75	[k756, k758, k754]	37.24
k759	H + CH2OCH2	H + CH3CHO	-115.06	3.49e-23	cm^3 molecules^-1 s^-1	Group 76	[k759, k761, k755]	77.86
k760	H + CH3CHO	H + CH2OCH2	115.06	6.28e-25	cm^3 molecules^-1 s^-1	Group 86	[k762, k757, k760]	1.59
k761	H + CH2OCH2	H2O + C2H3	-113.69	9.80e-24	cm^3 molecules^-1 s^-1	Group 76	[k759, k761, k755]	21.86
k762	H + CH3CHO	H2O + C2H3	1.37	2.79e-23	cm^3 molecules^-1 s^-1	Group 86	[k762, k757, k760]	70.58
k763	H + HOCO	H2 + CO2	-427.96	3.21e-23	cm^3 molecules^-1 s^-1	Group 115	[k763, k235, k768, k233, k767, k237, k765]	38.96
k764	C + H2O2	H + HOCO	-547.14	3.73e-23	cm^3 molecules^-1 s^-1	Group 11	[k1022, k324, k1070, k322, k764, k1069, k326, k1068, k1067, k1066]	18.00
k765	H + HOCO	O + H2CO	106.61	7.98e-26	cm^3 molecules^-1 s^-1	Group 115	[k763, k235, k768, k233, k767, k237, k765]	0.10
k766	O + H2CO	H + HOCO	-106.61	1.85e-23	cm^3 molecules^-1 s^-1	Group 183	[k1023, k462, k1163, k460, k766, k1162, k464]	8.78
k767	H + HOCO	OH + HCO	43.81	5.21e-26	cm^3 molecules^-1 s^-1	Group 115	[k763, k235, k768, k233, k767, k237, k765]	0.06
k768	H + HOCO	H2O + CO	-387.54	6.16e-24	cm^3 molecules^-1 s^-1	Group 115	[k763, k235, k768, k233, k767, k237, k765]	7.48
k769	H + HOCHCH3	H2 + CH2CHOH	-286.55	4.33e-23	cm^3 molecules^-1 s^-1	Group 114	[k239, k779, k777, k241, k771, k769, k770, k773, k778, k775, k774, k772]	16.12
k770	H + HOCHCH3	H2 + CH2OCH2	-213.14	1.71e-23	cm^3 molecules^-1 s^-1	Group 114	[k239, k779, k777, k241, k771, k769, k770, k773, k778, k775, k774, k772]	6.37
k771	H + HOCHCH3	H2 + CH3CHO	-328.2	3.20e-23	cm^3 molecules^-1 s^-1	Group 114	[k239, k779, k777, k241, k771, k769, k770, k773, k778, k775, k774, k772]	11.92
k772	H + HOCHCH3	CH2 + CH3OH	27.84	2.26e-26	cm^3 molecules^-1 s^-1	Group 114	[k239, k779, k777, k241, k771, k769, k770, k773, k778, k775, k774, k772]	0.01
k773	H + HOCHCH3	CH3 + CH2OH	-33.67	3.98e-23	cm^3 molecules^-1 s^-1	Group 114	[k239, k779, k777, k241, k771, k769, k770, k773, k778, k775, k774, k772]	14.82
k774	H + HOCHCH3	CH3 + CH3O	5.62	1.06e-24	cm^3 molecules^-1 s^-1	Group 114	[k239, k779, k777, k241, k771, k769, k770, k773, k778, k775, k774, k772]	0.39
k775	H + HOCHCH3	O + CH3CH3	5.28	2.26e-25	cm^3 molecules^-1 s^-1	Group 114	[k239, k779, k777, k241, k771, k769, k770, k773, k778, k775, k774, k772]	0.08
k776	O + CH3CH3	H + HOCHCH3	-5.28	7.62e-24	cm^3 molecules^-1 s^-1	Group 163	[k466, k1166, k1164, k468, k1026, k1024, k1025, k1134, k1165, k776, k1135, k1103]	2.58
k777	H + HOCHCH3	CH4 + H2CO	-345.1	5.03e-23	cm^3 molecules^-1 s^-1	Group 114	[k239, k779, k777, k241, k771, k769, k770, k773, k778, k775, k774, k772]	18.73
k778	H + HOCHCH3	OH + C2H5	-4.51	2.35e-23	cm^3 molecules^-1 s^-1	Group 114	[k239, k779, k777, k241, k771, k769, k770, k773, k778, k775, k774, k772]	8.75
k779	H + HOCHCH3	H2O + CH2CH2	-351.17	9.52e-24	cm^3 molecules^-1 s^-1	Group 114	[k239, k779, k777, k241, k771, k769, k770, k773, k778, k775, k774, k772]	3.55
k780	H + CH2OO	H + HCOOH	-380.46	4.29e-23	cm^3 molecules^-1 s^-1	Group 79	[k791, k783, k780, k790, k785, k786, k788, k781, k784]	19.27
k781	H + CH2OO	H + H2CO2	102.54	3.01e-26	cm^3 molecules^-1 s^-1	Group 79	[k791, k783, k780, k790, k785, k786, k788, k781, k784]	0.01
k782	H + H2CO2	H + CH2OO	-102.54	2.63e-23	cm^3 molecules^-1 s^-1	Group 104	[k807, k798, k792, k806, k801, k782, k802, k804, k800, k799]	19.32
k783	H + CH2OO	H2 + HOCO	-406.62	1.80e-23	cm^3 molecules^-1 s^-1	Group 79	[k791, k783, k780, k790, k785, k786, k788, k781, k784]	8.09
k784	H + CH2OO	CH2 + HO2	180.75	1.37e-24	cm^3 molecules^-1 s^-1	Group 79	[k791, k783, k780, k790, k785, k786, k788, k781, k784]	0.62
k785	H + CH2OO	CH3 + O2	-75.57	2.84e-23	cm^3 molecules^-1 s^-1	Group 79	[k791, k783, k780, k790, k785, k786, k788, k781, k784]	12.76
k786	H + CH2OO	O + CH2OH	11.03	1.52e-23	cm^3 molecules^-1 s^-1	Group 79	[k791, k783, k780, k790, k785, k786, k788, k781, k784]	6.83
k787	O + CH2OH	H + CH2OO	-11.03	4.75e-23	cm^3 molecules^-1 s^-1	Group 156	[k1170, k1027, k794, k1169, k1136, k787, k1167, k803, k1104]	17.93
k788	H + CH2OO	O + CH3O	50.32	5.02e-23	cm^3 molecules^-1 s^-1	Group 79	[k791, k783, k780, k790, k785, k786, k788, k781, k784]	22.55
k789	O + CH3O	H + CH2OO	-50.32	1.89e-23	cm^3 molecules^-1 s^-1	Group 170	[k1172, k1028, k795, k1171, k1137, k789, k1168, k805, k1105, k1084]	6.87
k790	H + CH2OO	OH + H2CO	-293.54	4.73e-23	cm^3 molecules^-1 s^-1	Group 79	[k791, k783, k780, k790, k785, k786, k788, k781, k784]	21.25
k791	H + CH2OO	H2O + HCO	-422.95	1.92e-23	cm^3 molecules^-1 s^-1	Group 79	[k791, k783, k780, k790, k785, k786, k788, k781, k784]	8.63
k792	H + H2CO2	H + HCOOH	-483.0	4.55e-23	cm^3 molecules^-1 s^-1	Group 104	[k807, k798, k792, k806, k801, k782, k802, k804, k800, k799]	33.43
k793	H + HCOOH	H2 + HOCO	-26.16	1.51e-28	cm^3 molecules^-1 s^-1	Group 111	[k797, k793, k796]	28.60
k794	O + CH2OH	H + HCOOH	-391.49	2.93e-23	cm^3 molecules^-1 s^-1	Group 156	[k1170, k1027, k794, k1169, k1136, k787, k1167, k803, k1104]	11.06
k795	O + CH3O	H + HCOOH	-430.78	4.95e-23	cm^3 molecules^-1 s^-1	Group 170	[k1172, k1028, k795, k1171, k1137, k789, k1168, k805, k1105, k1084]	18.00
k796	H + HCOOH	OH + H2CO	86.92	1.65e-28	cm^3 molecules^-1 s^-1	Group 111	[k797, k793, k796]	31.25
k797	H + HCOOH	H2O + HCO	-42.49	2.12e-28	cm^3 molecules^-1 s^-1	Group 111	[k797, k793, k796]	40.15
k798	H + H2CO2	H2 + HOCO	-509.16	1.99e-23	cm^3 molecules^-1 s^-1	Group 104	[k807, k798, k792, k806, k801, k782, k802, k804, k800, k799]	14.62
k799	H + H2CO2	CH + H2O2	135.44	5.87e-25	cm^3 molecules^-1 s^-1	Group 104	[k807, k798, k792, k806, k801, k782, k802, k804, k800, k799]	0.43
k800	H + H2CO2	CH2 + HO2	78.21	2.44e-25	cm^3 molecules^-1 s^-1	Group 104	[k807, k798, k792, k806, k801, k782, k802, k804, k800, k799]	0.18
k801	H + H2CO2	CH3 + O2	-178.11	1.04e-23	cm^3 molecules^-1 s^-1	Group 104	[k807, k798, k792, k806, k801, k782, k802, k804, k800, k799]	7.64
k802	H + H2CO2	O + CH2OH	-91.51	1.67e-24	cm^3 molecules^-1 s^-1	Group 104	[k807, k798, k792, k806, k801, k782, k802, k804, k800, k799]	1.23
k803	O + CH2OH	H + H2CO2	91.51	6.18e-24	cm^3 molecules^-1 s^-1	Group 156	[k1170, k1027, k794, k1169, k1136, k787, k1167, k803, k1104]	2.33
k804	H + H2CO2	O + CH3O	-52.22	1.42e-24	cm^3 molecules^-1 s^-1	Group 104	[k807, k798, k792, k806, k801, k782, k802, k804, k800, k799]	1.04
k805	O + CH3O	H + H2CO2	52.22	1.97e-23	cm^3 molecules^-1 s^-1	Group 170	[k1172, k1028, k795, k1171, k1137, k789, k1168, k805, k1105, k1084]	7.16
k806	H + H2CO2	OH + H2CO	-396.08	1.33e-23	cm^3 molecules^-1 s^-1	Group 104	[k807, k798, k792, k806, k801, k782, k802, k804, k800, k799]	9.77
k807	H + H2CO2	H2O + HCO	-525.49	1.68e-23	cm^3 molecules^-1 s^-1	Group 104	[k807, k798, k792, k806, k801, k782, k802, k804, k800, k799]	12.34
k808	H + CH3CH2OH	H + CH3OCH3	50.81	5.44e-25	cm^3 molecules^-1 s^-1	Group 84	[k811, k810, k808]	3.45
k809	H + CH3OCH3	H + CH3CH2OH	-50.81	5.80e-26	cm^3 molecules^-1 s^-1	Group 95	[k813, k812, k809]	0.07
k810	H + CH3CH2OH	H2 + HOCHCH3	-41.57	7.35e-25	cm^3 molecules^-1 s^-1	Group 84	[k811, k810, k808]	4.66
k811	H + CH3CH2OH	H2O + C2H5	-106.22	1.45e-23	cm^3 molecules^-1 s^-1	Group 84	[k811, k810, k808]	91.89
k812	H + CH3OCH3	H2 + HOCHCH3	-92.38	3.24e-23	cm^3 molecules^-1 s^-1	Group 95	[k813, k812, k809]	39.53
k813	H + CH3OCH3	H2O + C2H5	-157.03	4.95e-23	cm^3 molecules^-1 s^-1	Group 95	[k813, k812, k809]	60.40
k814	H + CH3OOH	H + CH2OHOH	-264.29	4.63e-23	cm^3 molecules^-1 s^-1	Group 99	[k821, k822, k814, k820, k819]	52.16
k815	H + CH2OHOH	CH3 + H2O2	183.59	6.40e-26	cm^3 molecules^-1 s^-1	Group 78	[k817, k818, k816, k815]	0.10
k816	H + CH2OHOH	CH4 + HO2	111.72	4.64e-26	cm^3 molecules^-1 s^-1	Group 78	[k817, k818, k816, k815]	0.07
k817	H + CH2OHOH	H2O + CH2OH	-86.13	4.45e-23	cm^3 molecules^-1 s^-1	Group 78	[k817, k818, k816, k815]	69.85
k818	H + CH2OHOH	H2O + CH3O	-46.84	1.91e-23	cm^3 molecules^-1 s^-1	Group 78	[k817, k818, k816, k815]	29.98
k819	H + CH3OOH	CH3 + H2O2	-80.7	6.48e-26	cm^3 molecules^-1 s^-1	Group 99	[k821, k822, k814, k820, k819]	0.07
k820	H + CH3OOH	CH4 + HO2	-152.57	2.54e-26	cm^3 molecules^-1 s^-1	Group 99	[k821, k822, k814, k820, k819]	0.03
k821	H + CH3OOH	H2O + CH2OH	-350.42	3.28e-23	cm^3 molecules^-1 s^-1	Group 99	[k821, k822, k814, k820, k819]	36.95
k822	H + CH3OOH	H2O + CH3O	-311.13	9.58e-24	cm^3 molecules^-1 s^-1	Group 99	[k821, k822, k814, k820, k819]	10.79
k823	H + C3OH	H2 + C3O	-175.93	3.63e-23	cm^3 molecules^-1 s^-1	Group 71	[k826, k823, k825, k824]	40.99
k824	H + C3OH	C + H2CCO	159.71	7.46e-26	cm^3 molecules^-1 s^-1	Group 71	[k826, k823, k825, k824]	0.08
k825	H + C3OH	H2O + C3	69.33	1.84e-25	cm^3 molecules^-1 s^-1	Group 71	[k826, k823, k825, k824]	0.21
k826	H + C3OH	CHCH + CO	-391.25	5.20e-23	cm^3 molecules^-1 s^-1	Group 71	[k826, k823, k825, k824]	58.72
k827	C + HOCO	H + C2O2	-299.69	1.51e-25	cm^3 molecules^-1 s^-1	Group 14	[k1076, k1075, k827]	0.50
k828	H + C2O2	CH + CO2	-30.81	1.46e-24	cm^3 molecules^-1 s^-1	Group 65	[k829, k828]	13.44
k829	H + C2O2	CO + HCO	-302.95	9.40e-24	cm^3 molecules^-1 s^-1	Group 65	[k829, k828]	86.56
k830	H + CH3COCH2	CH2 + CH2CHOH	80.13	1.62e-23	cm^3 molecules^-1 s^-1	Group 89	[k243, k840, k833, k836, k841, k834, k837, k842, k835, k832, k830, k838, k839, k831]	4.22
k831	H + CH3COCH2	CH2 + CH2OCH2	153.54	1.09e-25	cm^3 molecules^-1 s^-1	Group 89	[k243, k840, k833, k836, k841, k834, k837, k842, k835, k832, k830, k838, k839, k831]	0.03
k832	H + CH3COCH2	CH2 + CH3CHO	38.48	3.09e-23	cm^3 molecules^-1 s^-1	Group 89	[k243, k840, k833, k836, k841, k834, k837, k842, k835, k832, k830, k838, k839, k831]	8.04
k833	H + CH3COCH2	CH4 + H2CCO	-309.45	4.29e-23	cm^3 molecules^-1 s^-1	Group 89	[k243, k840, k833, k836, k841, k834, k837, k842, k835, k832, k830, k838, k839, k831]	11.16
k834	H + CH3COCH2	CH4 + HCCOH	-168.8	2.28e-23	cm^3 molecules^-1 s^-1	Group 89	[k243, k840, k833, k836, k841, k834, k837, k842, k835, k832, k830, k838, k839, k831]	5.93
k835	H + CH3COCH2	OH + C3H5	19.69	4.68e-23	cm^3 molecules^-1 s^-1	Group 89	[k243, k840, k833, k836, k841, k834, k837, k842, k835, k832, k830, k838, k839, k831]	12.18
k836	H + CH3COCH2	H2O + C3H4	-243.76	3.09e-23	cm^3 molecules^-1 s^-1	Group 89	[k243, k840, k833, k836, k841, k834, k837, k842, k835, k832, k830, k838, k839, k831]	8.04
k837	H + CH3COCH2	CHCH + CH3OH	-158.7	2.99e-23	cm^3 molecules^-1 s^-1	Group 89	[k243, k840, k833, k836, k841, k834, k837, k842, k835, k832, k830, k838, k839, k831]	7.78
k838	H + CH3COCH2	C2H3 + CH2OH	93.35	4.62e-23	cm^3 molecules^-1 s^-1	Group 89	[k243, k840, k833, k836, k841, k834, k837, k842, k835, k832, k830, k838, k839, k831]	12.02
k839	H + CH3COCH2	C2H3 + CH3O	132.64	3.67e-26	cm^3 molecules^-1 s^-1	Group 89	[k243, k840, k833, k836, k841, k834, k837, k842, k835, k832, k830, k838, k839, k831]	0.01
k840	H + CH3COCH2	CO + CH3CH3	-379.73	5.03e-23	cm^3 molecules^-1 s^-1	Group 89	[k243, k840, k833, k836, k841, k834, k837, k842, k835, k832, k830, k838, k839, k831]	13.09
k841	H + CH3COCH2	CH2CH2 + H2CO	-242.03	4.66e-23	cm^3 molecules^-1 s^-1	Group 89	[k243, k840, k833, k836, k841, k834, k837, k842, k835, k832, k830, k838, k839, k831]	12.13
k842	H + CH3COCH2	HCO + C2H5	-24.78	6.64e-24	cm^3 molecules^-1 s^-1	Group 89	[k243, k840, k833, k836, k841, k834, k837, k842, k835, k832, k830, k838, k839, k831]	1.73
k843	H + CH3COCH3	H2 + CH3COCH2	-34.53	1.06e-26	cm^3 molecules^-1 s^-1	Group 90	[k844, k845, k843]	0.01
k844	H + CH3COCH3	H2O + C3H5	-74.98	2.64e-23	cm^3 molecules^-1 s^-1	Group 90	[k844, k845, k843]	36.21
k845	H + CH3COCH3	HCO + CH3CH3	-43.05	4.65e-23	cm^3 molecules^-1 s^-1	Group 90	[k844, k845, k843]	63.78
k846	H + C2H3O2	H2O + H2CCO	-273.58	2.74e-23	cm^3 molecules^-1 s^-1	Group 63	[k846, k850, k847, k848, k849]	24.19
k847	H + C2H3O2	H2O + HCCOH	-132.93	9.64e-24	cm^3 molecules^-1 s^-1	Group 63	[k846, k850, k847, k848, k849]	8.51
k848	H + C2H3O2	HCO + CH2OH	41.68	4.78e-23	cm^3 molecules^-1 s^-1	Group 63	[k846, k850, k847, k848, k849]	42.20
k849	H + C2H3O2	HCO + CH3O	80.97	2.59e-26	cm^3 molecules^-1 s^-1	Group 63	[k846, k850, k847, k848, k849]	0.02
k850	H + C2H3O2	H2CO + H2CO	-200.09	2.84e-23	cm^3 molecules^-1 s^-1	Group 63	[k846, k850, k847, k848, k849]	25.07
k851	H + CO3	O + HOCO	9.33	1.25e-24	cm^3 molecules^-1 s^-1	Group 101	[k245, k853, k854, k855, k851]	1.11
k852	O + HOCO	H + CO3	-9.33	4.11e-27	cm^3 molecules^-1 s^-1	Group 194	[k504, k1222, k1223, k1224, k852]	0.01
k853	H + CO3	OH + CO2	-412.16	4.84e-23	cm^3 molecules^-1 s^-1	Group 101	[k245, k853, k854, k855, k851]	42.93
k854	H + CO3	CO + HO2	-154.99	1.58e-23	cm^3 molecules^-1 s^-1	Group 101	[k245, k853, k854, k855, k851]	14.01
k855	H + CO3	HCO + O2	-14.95	3.22e-23	cm^3 molecules^-1 s^-1	Group 101	[k245, k853, k854, k855, k851]	28.56
k856	H + CH3COOH	H + HCOOCH3	71.59	2.38e-23	cm^3 molecules^-1 s^-1	Group 91	[k865, k862, k863, k869, k247, k856, k868, k870, k858, k871, k866, k860, k867]	6.81
k857	H + HCOOCH3	H + CH3COOH	-71.59	3.83e-23	cm^3 molecules^-1 s^-1	Group 110	[k879, k876, k877, k857, k883, k249, k882, k884, k872, k885, k880, k874, k881]	10.97
k858	H + CH3COOH	H + OHCH2CHO	114.06	2.66e-23	cm^3 molecules^-1 s^-1	Group 91	[k865, k862, k863, k869, k247, k856, k868, k870, k858, k871, k866, k860, k867]	7.61
k859	H + OHCH2CHO	H + CH3COOH	-114.06	2.18e-23	cm^3 molecules^-1 s^-1	Group 120	[k891, k888, k889, k859, k896, k251, k873, k894, k897, k898, k892, k886, k893, k895]	5.28
k860	H + CH3COOH	H + OHCHCHOH	145.72	4.16e-24	cm^3 molecules^-1 s^-1	Group 91	[k865, k862, k863, k869, k247, k856, k868, k870, k858, k871, k866, k860, k867]	1.19
k861	H + OHCHCHOH	H + CH3COOH	-145.72	1.99e-23	cm^3 molecules^-1 s^-1	Group 121	[k902, k899, k900, k861, k907, k253, k875, k905, k909, k887, k910, k903, k904, k906, k908]	4.47
k862	H + CH3COOH	H2 + C2H3O2	-24.2	2.51e-23	cm^3 molecules^-1 s^-1	Group 91	[k865, k862, k863, k869, k247, k856, k868, k870, k858, k871, k866, k860, k867]	7.18
k863	H + CH3COOH	CH3 + HCOOH	-18.68	2.23e-23	cm^3 molecules^-1 s^-1	Group 91	[k865, k862, k863, k869, k247, k856, k868, k870, k858, k871, k866, k860, k867]	6.38
k864	O + HOCHCH3	H + CH3COOH	-406.48	2.23e-23	cm^3 molecules^-1 s^-1	Group 193	[k1225, k1034, k1147, k864, k1231, k506, k878, k1228, k1233, k890, k1234, k1226, k901, k1227, k1230, k1232, k1146, k1229, k1090, k1148]	5.57
k865	H + CH3COOH	CH4 + HOCO	-45.23	4.03e-23	cm^3 molecules^-1 s^-1	Group 91	[k865, k862, k863, k869, k247, k856, k868, k870, k858, k871, k866, k860, k867]	11.53
k866	H + CH3COOH	OH + CH2CHOH	126.4	2.56e-23	cm^3 molecules^-1 s^-1	Group 91	[k865, k862, k863, k869, k247, k856, k868, k870, k858, k871, k866, k860, k867]	7.33
k867	H + CH3COOH	OH + CH2OCH2	199.81	5.64e-25	cm^3 molecules^-1 s^-1	Group 91	[k865, k862, k863, k869, k247, k856, k868, k870, k858, k871, k866, k860, k867]	0.16
k868	H + CH3COOH	OH + CH3CHO	84.75	1.46e-23	cm^3 molecules^-1 s^-1	Group 91	[k865, k862, k863, k869, k247, k856, k868, k870, k858, k871, k866, k860, k867]	4.18
k869	H + CH3COOH	HCO + CH3OH	53.84	4.77e-23	cm^3 molecules^-1 s^-1	Group 91	[k865, k862, k863, k869, k247, k856, k868, k870, k858, k871, k866, k860, k867]	13.65
k870	H + CH3COOH	H2CO + CH2OH	86.75	3.12e-23	cm^3 molecules^-1 s^-1	Group 91	[k865, k862, k863, k869, k247, k856, k868, k870, k858, k871, k866, k860, k867]	8.93
k871	H + CH3COOH	H2CO + CH3O	126.04	5.00e-23	cm^3 molecules^-1 s^-1	Group 91	[k865, k862, k863, k869, k247, k856, k868, k870, k858, k871, k866, k860, k867]	14.31
k872	H + HCOOCH3	H + OHCH2CHO	42.47	1.67e-23	cm^3 molecules^-1 s^-1	Group 110	[k879, k876, k877, k857, k883, k249, k882, k884, k872, k885, k880, k874, k881]	4.78
k873	H + OHCH2CHO	H + HCOOCH3	-42.47	2.02e-23	cm^3 molecules^-1 s^-1	Group 120	[k891, k888, k889, k859, k896, k251, k873, k894, k897, k898, k892, k886, k893, k895]	4.89
k874	H + HCOOCH3	H + OHCHCHOH	74.13	2.81e-23	cm^3 molecules^-1 s^-1	Group 110	[k879, k876, k877, k857, k883, k249, k882, k884, k872, k885, k880, k874, k881]	8.05
k875	H + OHCHCHOH	H + HCOOCH3	-74.13	4.29e-23	cm^3 molecules^-1 s^-1	Group 121	[k902, k899, k900, k861, k907, k253, k875, k905, k909, k887, k910, k903, k904, k906, k908]	9.63
k876	H + HCOOCH3	H2 + C2H3O2	-95.79	3.89e-23	cm^3 molecules^-1 s^-1	Group 110	[k879, k876, k877, k857, k883, k249, k882, k884, k872, k885, k880, k874, k881]	11.14
k877	H + HCOOCH3	CH3 + HCOOH	-90.27	1.40e-23	cm^3 molecules^-1 s^-1	Group 110	[k879, k876, k877, k857, k883, k249, k882, k884, k872, k885, k880, k874, k881]	4.01
k878	O + HOCHCH3	H + HCOOCH3	-334.89	1.17e-24	cm^3 molecules^-1 s^-1	Group 193	[k1225, k1034, k1147, k864, k1231, k506, k878, k1228, k1233, k890, k1234, k1226, k901, k1227, k1230, k1232, k1146, k1229, k1090, k1148]	0.29
k879	H + HCOOCH3	CH4 + HOCO	-116.82	4.94e-23	cm^3 molecules^-1 s^-1	Group 110	[k879, k876, k877, k857, k883, k249, k882, k884, k872, k885, k880, k874, k881]	14.15
k880	H + HCOOCH3	OH + CH2CHOH	54.81	1.23e-23	cm^3 molecules^-1 s^-1	Group 110	[k879, k876, k877, k857, k883, k249, k882, k884, k872, k885, k880, k874, k881]	3.52
k881	H + HCOOCH3	OH + CH2OCH2	128.22	4.16e-25	cm^3 molecules^-1 s^-1	Group 110	[k879, k876, k877, k857, k883, k249, k882, k884, k872, k885, k880, k874, k881]	0.12
k882	H + HCOOCH3	OH + CH3CHO	13.16	2.05e-23	cm^3 molecules^-1 s^-1	Group 110	[k879, k876, k877, k857, k883, k249, k882, k884, k872, k885, k880, k874, k881]	5.87
k883	H + HCOOCH3	HCO + CH3OH	-17.75	4.56e-23	cm^3 molecules^-1 s^-1	Group 110	[k879, k876, k877, k857, k883, k249, k882, k884, k872, k885, k880, k874, k881]	13.06
k884	H + HCOOCH3	H2CO + CH2OH	15.16	2.92e-23	cm^3 molecules^-1 s^-1	Group 110	[k879, k876, k877, k857, k883, k249, k882, k884, k872, k885, k880, k874, k881]	8.36
k885	H + HCOOCH3	H2CO + CH3O	54.45	1.18e-23	cm^3 molecules^-1 s^-1	Group 110	[k879, k876, k877, k857, k883, k249, k882, k884, k872, k885, k880, k874, k881]	3.38
k886	H + OHCH2CHO	H + OHCHCHOH	31.66	4.07e-25	cm^3 molecules^-1 s^-1	Group 120	[k891, k888, k889, k859, k896, k251, k873, k894, k897, k898, k892, k886, k893, k895]	0.10
k887	H + OHCHCHOH	H + OHCH2CHO	-31.66	5.20e-23	cm^3 molecules^-1 s^-1	Group 121	[k902, k899, k900, k861, k907, k253, k875, k905, k909, k887, k910, k903, k904, k906, k908]	11.67
k888	H + OHCH2CHO	H2 + C2H3O2	-138.26	5.01e-23	cm^3 molecules^-1 s^-1	Group 120	[k891, k888, k889, k859, k896, k251, k873, k894, k897, k898, k892, k886, k893, k895]	12.13
k889	H + OHCH2CHO	CH3 + HCOOH	-132.74	3.02e-23	cm^3 molecules^-1 s^-1	Group 120	[k891, k888, k889, k859, k896, k251, k873, k894, k897, k898, k892, k886, k893, k895]	7.31
k890	O + HOCHCH3	H + OHCH2CHO	-292.42	6.60e-24	cm^3 molecules^-1 s^-1	Group 193	[k1225, k1034, k1147, k864, k1231, k506, k878, k1228, k1233, k890, k1234, k1226, k901, k1227, k1230, k1232, k1146, k1229, k1090, k1148]	1.65
k891	H + OHCH2CHO	CH4 + HOCO	-159.29	4.85e-23	cm^3 molecules^-1 s^-1	Group 120	[k891, k888, k889, k859, k896, k251, k873, k894, k897, k898, k892, k886, k893, k895]	11.74
k892	H + OHCH2CHO	OH + CH2CHOH	12.34	3.07e-23	cm^3 molecules^-1 s^-1	Group 120	[k891, k888, k889, k859, k896, k251, k873, k894, k897, k898, k892, k886, k893, k895]	7.43
k893	H + OHCH2CHO	OH + CH2OCH2	85.75	2.30e-25	cm^3 molecules^-1 s^-1	Group 120	[k891, k888, k889, k859, k896, k251, k873, k894, k897, k898, k892, k886, k893, k895]	0.06
k894	H + OHCH2CHO	OH + CH3CHO	-29.31	4.97e-23	cm^3 molecules^-1 s^-1	Group 120	[k891, k888, k889, k859, k896, k251, k873, k894, k897, k898, k892, k886, k893, k895]	12.03
k895	H + OHCH2CHO	CH2CH2 + HO2	164.47	1.45e-24	cm^3 molecules^-1 s^-1	Group 120	[k891, k888, k889, k859, k896, k251, k873, k894, k897, k898, k892, k886, k893, k895]	0.35
k896	H + OHCH2CHO	HCO + CH3OH	-60.22	4.61e-23	cm^3 molecules^-1 s^-1	Group 120	[k891, k888, k889, k859, k896, k251, k873, k894, k897, k898, k892, k886, k893, k895]	11.16
k897	H + OHCH2CHO	H2CO + CH2OH	-27.31	5.07e-23	cm^3 molecules^-1 s^-1	Group 120	[k891, k888, k889, k859, k896, k251, k873, k894, k897, k898, k892, k886, k893, k895]	12.27
k898	H + OHCH2CHO	H2CO + CH3O	11.98	4.02e-23	cm^3 molecules^-1 s^-1	Group 120	[k891, k888, k889, k859, k896, k251, k873, k894, k897, k898, k892, k886, k893, k895]	9.73
k899	H + OHCHCHOH	H2 + C2H3O2	-169.92	5.24e-23	cm^3 molecules^-1 s^-1	Group 121	[k902, k899, k900, k861, k907, k253, k875, k905, k909, k887, k910, k903, k904, k906, k908]	11.76
k900	H + OHCHCHOH	CH3 + HCOOH	-164.4	5.21e-23	cm^3 molecules^-1 s^-1	Group 121	[k902, k899, k900, k861, k907, k253, k875, k905, k909, k887, k910, k903, k904, k906, k908]	11.69
k901	O + HOCHCH3	H + OHCHCHOH	-260.76	1.87e-23	cm^3 molecules^-1 s^-1	Group 193	[k1225, k1034, k1147, k864, k1231, k506, k878, k1228, k1233, k890, k1234, k1226, k901, k1227, k1230, k1232, k1146, k1229, k1090, k1148]	4.67
k902	H + OHCHCHOH	CH4 + HOCO	-190.95	3.95e-23	cm^3 molecules^-1 s^-1	Group 121	[k902, k899, k900, k861, k907, k253, k875, k905, k909, k887, k910, k903, k904, k906, k908]	8.86
k903	H + OHCHCHOH	OH + CH2CHOH	-19.32	1.65e-23	cm^3 molecules^-1 s^-1	Group 121	[k902, k899, k900, k861, k907, k253, k875, k905, k909, k887, k910, k903, k904, k906, k908]	3.70
k904	H + OHCHCHOH	OH + CH2OCH2	54.09	1.31e-23	cm^3 molecules^-1 s^-1	Group 121	[k902, k899, k900, k861, k907, k253, k875, k905, k909, k887, k910, k903, k904, k906, k908]	2.94
k905	H + OHCHCHOH	OH + CH3CHO	-60.97	3.38e-23	cm^3 molecules^-1 s^-1	Group 121	[k902, k899, k900, k861, k907, k253, k875, k905, k909, k887, k910, k903, k904, k906, k908]	7.58
k906	H + OHCHCHOH	CH2CH2 + HO2	132.81	1.20e-24	cm^3 molecules^-1 s^-1	Group 121	[k902, k899, k900, k861, k907, k253, k875, k905, k909, k887, k910, k903, k904, k906, k908]	0.27
k907	H + OHCHCHOH	HCO + CH3OH	-91.88	1.75e-23	cm^3 molecules^-1 s^-1	Group 121	[k902, k899, k900, k861, k907, k253, k875, k905, k909, k887, k910, k903, k904, k906, k908]	3.93
k908	H + OHCHCHOH	C2H5 + O2	188.16	8.33e-25	cm^3 molecules^-1 s^-1	Group 121	[k902, k899, k900, k861, k907, k253, k875, k905, k909, k887, k910, k903, k904, k906, k908]	0.19
k909	H + OHCHCHOH	H2CO + CH2OH	-58.97	1.79e-23	cm^3 molecules^-1 s^-1	Group 121	[k902, k899, k900, k861, k907, k253, k875, k905, k909, k887, k910, k903, k904, k906, k908]	4.02
k910	H + OHCHCHOH	H2CO + CH3O	-19.68	4.00e-23	cm^3 molecules^-1 s^-1	Group 121	[k902, k899, k900, k861, k907, k253, k875, k905, k909, k887, k910, k903, k904, k906, k908]	8.98
k911	H + CH3CHOHCH3	H + CH3OCH2CH3	53.89	7.54e-29	cm^3 molecules^-1 s^-1	Group 87	[k913, k911]	0.00
k912	H + CH3OCH2CH3	H + CH3CHOHCH3	-53.89	2.85e-24	cm^3 molecules^-1 s^-1	Group 93	[k912, k915]	98.94
k913	H + CH3CHOHCH3	H + CH3CH2CH2OH	17.41	2.10e-23	cm^3 molecules^-1 s^-1	Group 87	[k913, k911]	100.00
k914	H + CH3CH2CH2OH	H + CH3CHOHCH3	-17.41	6.46e-24	cm^3 molecules^-1 s^-1	Group 81	[k914, k916]	88.40
k915	H + CH3OCH2CH3	H + CH3CH2CH2OH	-36.48	3.06e-26	cm^3 molecules^-1 s^-1	Group 93	[k912, k915]	1.06
k916	H + CH3CH2CH2OH	H + CH3OCH2CH3	36.48	8.48e-25	cm^3 molecules^-1 s^-1	Group 81	[k914, k916]	11.60
k917	H + HCO3	H2O + CO2	-128.73	1.04e-25	cm^3 molecules^-1 s^-1	Group 109	[k917, k255]	48.83
k918	H + CH3OCHOH	H2 + CH3COOH	-490.47	1.66e-23	cm^3 molecules^-1 s^-1	Group 96	[k928, k918, k933, k263, k257, k931, k919, k920, k259, k936, k932, k921, k261, k934, k937, k927, k938, k930, k922, k939, k923, k929, k940, k925, k935]	2.27
k919	H + CH3OCHOH	H2 + HCOOCH3	-418.88	2.48e-23	cm^3 molecules^-1 s^-1	Group 96	[k928, k918, k933, k263, k257, k931, k919, k920, k259, k936, k932, k921, k261, k934, k937, k927, k938, k930, k922, k939, k923, k929, k940, k925, k935]	3.39
k920	H + CH3OCHOH	H2 + OHCH2CHO	-376.41	2.40e-23	cm^3 molecules^-1 s^-1	Group 96	[k928, k918, k933, k263, k257, k931, k919, k920, k259, k936, k932, k921, k261, k934, k937, k927, k938, k930, k922, k939, k923, k929, k940, k925, k935]	3.28
k921	H + CH3OCHOH	H2 + OHCHCHOH	-344.75	1.95e-23	cm^3 molecules^-1 s^-1	Group 96	[k928, k918, k933, k263, k257, k931, k919, k920, k259, k936, k932, k921, k261, k934, k937, k927, k938, k930, k922, k939, k923, k929, k940, k925, k935]	2.66
k922	H + CH3OCHOH	CH2 + CH2OHOH	-60.05	2.28e-23	cm^3 molecules^-1 s^-1	Group 96	[k928, k918, k933, k263, k257, k931, k919, k920, k259, k936, k932, k921, k261, k934, k937, k927, k938, k930, k922, k939, k923, k929, k940, k925, k935]	3.11
k923	H + CH3OCHOH	O + CH3CH2OH	-42.42	3.63e-23	cm^3 molecules^-1 s^-1	Group 96	[k928, k918, k933, k263, k257, k931, k919, k920, k259, k936, k932, k921, k261, k934, k937, k927, k938, k930, k922, k939, k923, k929, k940, k925, k935]	4.96
k924	O + CH3CH2OH	H + CH3OCHOH	42.42	5.85e-24	cm^3 molecules^-1 s^-1	Group 162	[k1245, k1035, k1250, k514, k508, k1248, k1037, k1039, k510, k1253, k1249, k1041, k512, k1251, k1254, k1244, k1255, k1247, k1113, k1256, k1246, k1257, k924, k1242, k1252]	0.87
k925	H + CH3OCHOH	O + CH3OCH3	8.39	2.96e-23	cm^3 molecules^-1 s^-1	Group 96	[k928, k918, k933, k263, k257, k931, k919, k920, k259, k936, k932, k921, k261, k934, k937, k927, k938, k930, k922, k939, k923, k929, k940, k925, k935]	4.04
k926	O + CH3OCH3	H + CH3OCHOH	-8.39	1.80e-23	cm^3 molecules^-1 s^-1	Group 173	[k1259, k1036, k1264, k522, k516, k1262, k1038, k1040, k518, k1267, k1263, k1042, k520, k1265, k1268, k1258, k1269, k1261, k1114, k1270, k1243, k1260, k1271, k926, k1266, k1115]	2.29
k927	H + CH3OCHOH	CH4 + CH2OO	-129.08	1.44e-23	cm^3 molecules^-1 s^-1	Group 96	[k928, k918, k933, k263, k257, k931, k919, k920, k259, k936, k932, k921, k261, k934, k937, k927, k938, k930, k922, k939, k923, k929, k940, k925, k935]	1.97
k928	H + CH3OCHOH	CH4 + HCOOH	-509.54	2.88e-23	cm^3 molecules^-1 s^-1	Group 96	[k928, k918, k933, k263, k257, k931, k919, k920, k259, k936, k932, k921, k261, k934, k937, k927, k938, k930, k922, k939, k923, k929, k940, k925, k935]	3.93
k929	H + CH3OCHOH	CH4 + H2CO2	-26.54	1.65e-23	cm^3 molecules^-1 s^-1	Group 96	[k928, k918, k933, k263, k257, k931, k919, k920, k259, k936, k932, k921, k261, k934, k937, k927, k938, k930, k922, k939, k923, k929, k940, k925, k935]	2.25
k930	H + CH3OCHOH	OH + HOCHCH3	-77.52	5.20e-23	cm^3 molecules^-1 s^-1	Group 96	[k928, k918, k933, k263, k257, k931, k919, k920, k259, k936, k932, k921, k261, k934, k937, k927, k938, k930, k922, k939, k923, k929, k940, k925, k935]	7.10
k931	H + CH3OCHOH	H2O + CH2CHOH	-424.21	5.27e-23	cm^3 molecules^-1 s^-1	Group 96	[k928, k918, k933, k263, k257, k931, k919, k920, k259, k936, k932, k921, k261, k934, k937, k927, k938, k930, k922, k939, k923, k929, k940, k925, k935]	7.20
k932	H + CH3OCHOH	H2O + CH2OCH2	-350.8	4.89e-23	cm^3 molecules^-1 s^-1	Group 96	[k928, k918, k933, k263, k257, k931, k919, k920, k259, k936, k932, k921, k261, k934, k937, k927, k938, k930, k922, k939, k923, k929, k940, k925, k935]	6.68
k933	H + CH3OCHOH	H2O + CH3CHO	-465.86	4.12e-23	cm^3 molecules^-1 s^-1	Group 96	[k928, k918, k933, k263, k257, k931, k919, k920, k259, k936, k932, k921, k261, k934, k937, k927, k938, k930, k922, k939, k923, k929, k940, k925, k935]	5.63
k934	H + CH3OCHOH	CH2CH2 + H2O2	-140.46	1.88e-23	cm^3 molecules^-1 s^-1	Group 96	[k928, k918, k933, k263, k257, k931, k919, k920, k259, k936, k932, k921, k261, k934, k937, k927, k938, k930, k922, k939, k923, k929, k940, k925, k935]	2.57
k935	H + CH3OCHOH	C2H5 + HO2	74.58	1.14e-24	cm^3 molecules^-1 s^-1	Group 96	[k928, k918, k933, k263, k257, k931, k919, k920, k259, k936, k932, k921, k261, k934, k937, k927, k938, k930, k922, k939, k923, k929, k940, k925, k935]	0.16
k936	H + CH3OCHOH	H2CO + CH3OH	-367.36	5.09e-23	cm^3 molecules^-1 s^-1	Group 96	[k928, k918, k933, k263, k257, k931, k919, k920, k259, k936, k932, k921, k261, k934, k937, k927, k938, k930, k922, k939, k923, k929, k940, k925, k935]	6.95
k937	H + CH3OCHOH	CH3CH3 + O2	-140.33	2.50e-23	cm^3 molecules^-1 s^-1	Group 96	[k928, k918, k933, k263, k257, k931, k919, k920, k259, k936, k932, k921, k261, k934, k937, k927, k938, k930, k922, k939, k923, k929, k940, k925, k935]	3.41
k938	H + CH3OCHOH	CH2OH + CH2OH	-92.68	4.73e-23	cm^3 molecules^-1 s^-1	Group 96	[k928, k918, k933, k263, k257, k931, k919, k920, k259, k936, k932, k921, k261, k934, k937, k927, k938, k930, k922, k939, k923, k929, k940, k925, k935]	6.46
k939	H + CH3OCHOH	CH2OH + CH3O	-53.39	1.47e-23	cm^3 molecules^-1 s^-1	Group 96	[k928, k918, k933, k263, k257, k931, k919, k920, k259, k936, k932, k921, k261, k934, k937, k927, k938, k930, k922, k939, k923, k929, k940, k925, k935]	2.01
k940	H + CH3OCHOH	CH3O + CH3O	-14.1	1.14e-23	cm^3 molecules^-1 s^-1	Group 96	[k928, k918, k933, k263, k257, k931, k919, k920, k259, k936, k932, k921, k261, k934, k937, k927, k938, k930, k922, k939, k923, k929, k940, k925, k935]	1.56
k941	H + H2CO3	H2 + HCO3	-333.01	3.46e-23	cm^3 molecules^-1 s^-1	Group 105	[k941, k943, k942]	81.86
k942	H + H2CO3	OH + HCOOH	52.52	6.73e-26	cm^3 molecules^-1 s^-1	Group 105	[k941, k943, k942]	0.16
k943	H + H2CO3	H2O + HOCO	-33.78	7.60e-24	cm^3 molecules^-1 s^-1	Group 105	[k941, k943, k942]	17.98
k944	H + CH3CHOHOH	H + CH3OCH2OH	54.46	2.03e-23	cm^3 molecules^-1 s^-1	Group 88	[k952, k950, k955, k956, k947, k949, k944, k954, k953, k951]	9.29
k945	H + CH3OCH2OH	H + CH3CHOHOH	-54.46	4.48e-23	cm^3 molecules^-1 s^-1	Group 94	[k963, k961, k966, k967, k958, k960, k945, k965, k964, k962]	11.25
k946	H + CH3OOCH3	H + CH3CHOHOH	-277.67	2.53e-23	cm^3 molecules^-1 s^-1	Group 98	[k972, k970, k975, k976, k968, k969, k946, k957, k974, k973, k971]	7.03
k947	H + CH3CHOHOH	H + HOCH2CH2OH	-16.97	5.03e-23	cm^3 molecules^-1 s^-1	Group 88	[k952, k950, k955, k956, k947, k949, k944, k954, k953, k951]	23.03
k948	H + HOCH2CH2OH	H + CH3CHOHOH	16.97	2.69e-23	cm^3 molecules^-1 s^-1	Group 113	[k980, k978, k983, k984, k977, k948, k959, k982, k981, k979]	9.95
k949	H + CH3CHOHOH	H2 + CH3OCHOH	-7.43	5.24e-23	cm^3 molecules^-1 s^-1	Group 88	[k952, k950, k955, k956, k947, k949, k944, k954, k953, k951]	23.99
k950	H + CH3CHOHOH	CH3 + CH2OHOH	-92.63	1.88e-23	cm^3 molecules^-1 s^-1	Group 88	[k952, k950, k955, k956, k947, k949, k944, k954, k953, k951]	8.61
k951	H + CH3CHOHOH	CH3 + CH3OOH	171.66	3.22e-26	cm^3 molecules^-1 s^-1	Group 88	[k952, k950, k955, k956, k947, k949, k944, k954, k953, k951]	0.01
k952	H + CH3CHOHOH	H2O + HOCHCH3	-145.09	1.60e-23	cm^3 molecules^-1 s^-1	Group 88	[k952, k950, k955, k956, k947, k949, k944, k954, k953, k951]	7.33
k953	H + CH3CHOHOH	C2H5 + H2O2	138.63	5.67e-24	cm^3 molecules^-1 s^-1	Group 88	[k952, k950, k955, k956, k947, k949, k944, k954, k953, k951]	2.60
k954	H + CH3CHOHOH	CH3CH3 + HO2	83.41	1.60e-23	cm^3 molecules^-1 s^-1	Group 88	[k952, k950, k955, k956, k947, k949, k944, k954, k953, k951]	7.33
k955	H + CH3CHOHOH	CH2OH + CH3OH	-63.75	2.01e-23	cm^3 molecules^-1 s^-1	Group 88	[k952, k950, k955, k956, k947, k949, k944, k954, k953, k951]	9.20
k956	H + CH3CHOHOH	CH3O + CH3OH	-24.46	1.88e-23	cm^3 molecules^-1 s^-1	Group 88	[k952, k950, k955, k956, k947, k949, k944, k954, k953, k951]	8.61
k957	H + CH3OOCH3	H + CH3OCH2OH	-223.21	2.78e-23	cm^3 molecules^-1 s^-1	Group 98	[k972, k970, k975, k976, k968, k969, k946, k957, k974, k973, k971]	7.73
k958	H + CH3OCH2OH	H + HOCH2CH2OH	-71.43	5.24e-23	cm^3 molecules^-1 s^-1	Group 94	[k963, k961, k966, k967, k958, k960, k945, k965, k964, k962]	13.16
k959	H + HOCH2CH2OH	H + CH3OCH2OH	71.43	4.16e-23	cm^3 molecules^-1 s^-1	Group 113	[k980, k978, k983, k984, k977, k948, k959, k982, k981, k979]	15.39
k960	H + CH3OCH2OH	H2 + CH3OCHOH	-61.89	4.00e-23	cm^3 molecules^-1 s^-1	Group 94	[k963, k961, k966, k967, k958, k960, k945, k965, k964, k962]	10.05
k961	H + CH3OCH2OH	CH3 + CH2OHOH	-147.09	2.35e-23	cm^3 molecules^-1 s^-1	Group 94	[k963, k961, k966, k967, k958, k960, k945, k965, k964, k962]	5.90
k962	H + CH3OCH2OH	CH3 + CH3OOH	117.2	4.74e-23	cm^3 molecules^-1 s^-1	Group 94	[k963, k961, k966, k967, k958, k960, k945, k965, k964, k962]	11.91
k963	H + CH3OCH2OH	H2O + HOCHCH3	-199.55	5.03e-23	cm^3 molecules^-1 s^-1	Group 94	[k963, k961, k966, k967, k958, k960, k945, k965, k964, k962]	12.64
k964	H + CH3OCH2OH	C2H5 + H2O2	84.17	4.43e-23	cm^3 molecules^-1 s^-1	Group 94	[k963, k961, k966, k967, k958, k960, k945, k965, k964, k962]	11.13
k965	H + CH3OCH2OH	CH3CH3 + HO2	28.95	3.44e-23	cm^3 molecules^-1 s^-1	Group 94	[k963, k961, k966, k967, k958, k960, k945, k965, k964, k962]	8.64
k966	H + CH3OCH2OH	CH2OH + CH3OH	-118.21	4.29e-23	cm^3 molecules^-1 s^-1	Group 94	[k963, k961, k966, k967, k958, k960, k945, k965, k964, k962]	10.78
k967	H + CH3OCH2OH	CH3O + CH3OH	-78.92	1.81e-23	cm^3 molecules^-1 s^-1	Group 94	[k963, k961, k966, k967, k958, k960, k945, k965, k964, k962]	4.55
k968	H + CH3OOCH3	H + HOCH2CH2OH	-294.64	3.53e-23	cm^3 molecules^-1 s^-1	Group 98	[k972, k970, k975, k976, k968, k969, k946, k957, k974, k973, k971]	9.81
k969	H + CH3OOCH3	H2 + CH3OCHOH	-285.1	1.69e-23	cm^3 molecules^-1 s^-1	Group 98	[k972, k970, k975, k976, k968, k969, k946, k957, k974, k973, k971]	4.70
k970	H + CH3OOCH3	CH3 + CH2OHOH	-370.3	5.24e-23	cm^3 molecules^-1 s^-1	Group 98	[k972, k970, k975, k976, k968, k969, k946, k957, k974, k973, k971]	14.56
k971	H + CH3OOCH3	CH3 + CH3OOH	-106.01	1.15e-25	cm^3 molecules^-1 s^-1	Group 98	[k972, k970, k975, k976, k968, k969, k946, k957, k974, k973, k971]	0.03
k972	H + CH3OOCH3	H2O + HOCHCH3	-422.76	4.32e-23	cm^3 molecules^-1 s^-1	Group 98	[k972, k970, k975, k976, k968, k969, k946, k957, k974, k973, k971]	12.01
k973	H + CH3OOCH3	C2H5 + H2O2	-139.04	4.88e-23	cm^3 molecules^-1 s^-1	Group 98	[k972, k970, k975, k976, k968, k969, k946, k957, k974, k973, k971]	13.56
k974	H + CH3OOCH3	CH3CH3 + HO2	-194.26	3.08e-23	cm^3 molecules^-1 s^-1	Group 98	[k972, k970, k975, k976, k968, k969, k946, k957, k974, k973, k971]	8.56
k975	H + CH3OOCH3	CH2OH + CH3OH	-341.42	4.51e-23	cm^3 molecules^-1 s^-1	Group 98	[k972, k970, k975, k976, k968, k969, k946, k957, k974, k973, k971]	12.53
k976	H + CH3OOCH3	CH3O + CH3OH	-302.13	3.41e-23	cm^3 molecules^-1 s^-1	Group 98	[k972, k970, k975, k976, k968, k969, k946, k957, k974, k973, k971]	9.48
k977	H + HOCH2CH2OH	H2 + CH3OCHOH	9.54	7.89e-24	cm^3 molecules^-1 s^-1	Group 113	[k980, k978, k983, k984, k977, k948, k959, k982, k981, k979]	2.92
k978	H + HOCH2CH2OH	CH3 + CH2OHOH	-75.66	4.79e-23	cm^3 molecules^-1 s^-1	Group 113	[k980, k978, k983, k984, k977, k948, k959, k982, k981, k979]	17.72
k979	H + HOCH2CH2OH	CH3 + CH3OOH	188.63	9.09e-25	cm^3 molecules^-1 s^-1	Group 113	[k980, k978, k983, k984, k977, k948, k959, k982, k981, k979]	0.34
k980	H + HOCH2CH2OH	H2O + HOCHCH3	-128.12	3.24e-23	cm^3 molecules^-1 s^-1	Group 113	[k980, k978, k983, k984, k977, k948, k959, k982, k981, k979]	11.99
k981	H + HOCH2CH2OH	C2H5 + H2O2	155.6	2.56e-23	cm^3 molecules^-1 s^-1	Group 113	[k980, k978, k983, k984, k977, k948, k959, k982, k981, k979]	9.47
k982	H + HOCH2CH2OH	CH3CH3 + HO2	100.38	9.47e-24	cm^3 molecules^-1 s^-1	Group 113	[k980, k978, k983, k984, k977, k948, k959, k982, k981, k979]	3.50
k983	H + HOCH2CH2OH	CH2OH + CH3OH	-46.78	2.83e-23	cm^3 molecules^-1 s^-1	Group 113	[k980, k978, k983, k984, k977, k948, k959, k982, k981, k979]	10.47
k984	H + HOCH2CH2OH	CH3O + CH3OH	-7.49	4.93e-23	cm^3 molecules^-1 s^-1	Group 113	[k980, k978, k983, k984, k977, k948, k959, k982, k981, k979]	18.24
k985	O + C3OH	H + C3O2	-415.61	4.39e-23	cm^3 molecules^-1 s^-1	Group 152	[k1285, k985, k1283, k1286, k1091, k1284]	45.77
k986	H + C3O2	CO + C2OH	-58.27	1.37e-23	cm^3 molecules^-1 s^-1	Single (order=2)	-	100.00
k987	H + C2O3	C + HCO3	21.81	1.47e-26	cm^3 molecules^-1 s^-1	Group 66	[k990, k989, k987, k988]	0.08
k988	H + C2O3	OH + C2O2	81.49	3.14e-26	cm^3 molecules^-1 s^-1	Group 66	[k990, k989, k987, k988]	0.17
k989	H + C2O3	CO + HOCO	-265.27	1.01e-23	cm^3 molecules^-1 s^-1	Group 66	[k990, k989, k987, k988]	54.20
k990	H + C2O3	HCO + CO2	-322.02	8.49e-24	cm^3 molecules^-1 s^-1	Group 66	[k990, k989, k987, k988]	45.56
k991	H + OHCCOOH	CH + H2CO3	191.48	5.80e-25	cm^3 molecules^-1 s^-1	Group 119	[k997, k998, k995, k992, k996, k999, k993, k991]	0.36
k992	H + OHCCOOH	CH2 + HCO3	-127.28	3.47e-23	cm^3 molecules^-1 s^-1	Group 119	[k997, k998, k995, k992, k996, k999, k993, k991]	21.61
k993	H + OHCCOOH	CH3 + CO3	191.14	1.30e-23	cm^3 molecules^-1 s^-1	Group 119	[k997, k998, k995, k992, k996, k999, k993, k991]	8.10
k994	O + C2H3O2	H + OHCCOOH	-221.11	3.95e-23	cm^3 molecules^-1 s^-1	Group 141	[k1326, k1327, k1323, k1121, k1325, k994, k1328, k1150, k1096, k1330, k1322, k1329, k1324]	10.45
k995	H + OHCCOOH	HCO + HCOOH	-128.7	1.02e-23	cm^3 molecules^-1 s^-1	Group 119	[k997, k998, k995, k992, k996, k999, k993, k991]	6.35
k996	H + OHCCOOH	H2CO + HOCO	-85.59	1.96e-23	cm^3 molecules^-1 s^-1	Group 119	[k997, k998, k995, k992, k996, k999, k993, k991]	12.21
k997	H + OHCCOOH	CH2OH + CO2	-202.51	2.37e-23	cm^3 molecules^-1 s^-1	Group 119	[k997, k998, k995, k992, k996, k999, k993, k991]	14.76
k998	H + OHCCOOH	CH3O + CO2	-163.22	2.14e-23	cm^3 molecules^-1 s^-1	Group 119	[k997, k998, k995, k992, k996, k999, k993, k991]	13.33
k999	H + OHCCOOH	HO2 + H2CCO	170.75	3.74e-23	cm^3 molecules^-1 s^-1	Group 119	[k997, k998, k995, k992, k996, k999, k993, k991]	23.29
k1000	H + CH3CH2CHOHOH	CH3 + CH3CHOHOH	-58.28	5.00e-23	cm^3 molecules^-1 s^-1	Group 83	[k1007, k1013, k1009, k1002, k1004, k1003, k1000, k1006, k1011, k1010, k1005, k1001, k1012, k1014, k1008]	14.45
k1001	H + CH3CH2CHOHOH	CH3 + CH3OCH2OH	-3.82	1.10e-23	cm^3 molecules^-1 s^-1	Group 83	[k1007, k1013, k1009, k1002, k1004, k1003, k1000, k1006, k1011, k1010, k1005, k1001, k1012, k1014, k1008]	3.18
k1002	H + CH3CH2CHOHOH	CH3 + HOCH2CH2OH	-75.25	2.03e-23	cm^3 molecules^-1 s^-1	Group 83	[k1007, k1013, k1009, k1002, k1004, k1003, k1000, k1006, k1011, k1010, k1005, k1001, k1012, k1014, k1008]	5.87
k1003	H + CH3CH2CHOHOH	CH4 + CH3OCHOH	-66.1	2.85e-23	cm^3 molecules^-1 s^-1	Group 83	[k1007, k1013, k1009, k1002, k1004, k1003, k1000, k1006, k1011, k1010, k1005, k1001, k1012, k1014, k1008]	8.24
k1004	H + CH3CH2CHOHOH	OH + CH3CHOHCH3	-66.85	1.82e-23	cm^3 molecules^-1 s^-1	Group 83	[k1007, k1013, k1009, k1002, k1004, k1003, k1000, k1006, k1011, k1010, k1005, k1001, k1012, k1014, k1008]	5.26
k1005	H + CH3CH2CHOHOH	OH + CH3OCH2CH3	-12.96	4.85e-23	cm^3 molecules^-1 s^-1	Group 83	[k1007, k1013, k1009, k1002, k1004, k1003, k1000, k1006, k1011, k1010, k1005, k1001, k1012, k1014, k1008]	14.02
k1006	H + CH3CH2CHOHOH	OH + CH3CH2CH2OH	-49.44	4.02e-23	cm^3 molecules^-1 s^-1	Group 83	[k1007, k1013, k1009, k1002, k1004, k1003, k1000, k1006, k1011, k1010, k1005, k1001, k1012, k1014, k1008]	11.62
k1007	H + CH3CH2CHOHOH	C2H5 + CH2OHOH	-103.24	1.67e-23	cm^3 molecules^-1 s^-1	Group 83	[k1007, k1013, k1009, k1002, k1004, k1003, k1000, k1006, k1011, k1010, k1005, k1001, k1012, k1014, k1008]	4.83
k1008	H + CH3CH2CHOHOH	C2H5 + CH3OOH	161.05	1.11e-25	cm^3 molecules^-1 s^-1	Group 83	[k1007, k1013, k1009, k1002, k1004, k1003, k1000, k1006, k1011, k1010, k1005, k1001, k1012, k1014, k1008]	0.03
k1009	H + CH3CH2CHOHOH	CH2OH + CH3CH2OH	-83.15	1.10e-23	cm^3 molecules^-1 s^-1	Group 83	[k1007, k1013, k1009, k1002, k1004, k1003, k1000, k1006, k1011, k1010, k1005, k1001, k1012, k1014, k1008]	3.18
k1010	H + CH3CH2CHOHOH	CH2OH + CH3OCH3	-32.34	3.80e-23	cm^3 molecules^-1 s^-1	Group 83	[k1007, k1013, k1009, k1002, k1004, k1003, k1000, k1006, k1011, k1010, k1005, k1001, k1012, k1014, k1008]	10.98
k1011	H + CH3CH2CHOHOH	CH3O + CH3CH2OH	-43.86	4.23e-23	cm^3 molecules^-1 s^-1	Group 83	[k1007, k1013, k1009, k1002, k1004, k1003, k1000, k1006, k1011, k1010, k1005, k1001, k1012, k1014, k1008]	12.23
k1012	H + CH3CH2CHOHOH	CH3O + CH3OCH3	6.95	9.62e-24	cm^3 molecules^-1 s^-1	Group 83	[k1007, k1013, k1009, k1002, k1004, k1003, k1000, k1006, k1011, k1010, k1005, k1001, k1012, k1014, k1008]	2.78
k1013	H + CH3CH2CHOHOH	CH3OH + HOCHCH3	-88.36	6.61e-24	cm^3 molecules^-1 s^-1	Group 83	[k1007, k1013, k1009, k1002, k1004, k1003, k1000, k1006, k1011, k1010, k1005, k1001, k1012, k1014, k1008]	1.91
k1014	H + CH3CH2CHOHOH	HO2 + CH3CH2CH3	76.96	4.89e-24	cm^3 molecules^-1 s^-1	Group 83	[k1007, k1013, k1009, k1002, k1004, k1003, k1000, k1006, k1011, k1010, k1005, k1001, k1012, k1014, k1008]	1.41
k1015	CH3 + O	H2 + HCO	-355.33	4.17e-23	cm^3 molecules^-1 s^-1	Group 38	[k419, k421, k1015, k720, k1080, k1097]	40.13
k1016	O + CH4	H2 + H2CO	-285.67	5.24e-23	cm^3 molecules^-1 s^-1	Group 178	[k1016, k725, k728]	76.18
k1017	C + H2CO	H2 + C2O	-228.9	3.17e-23	cm^3 molecules^-1 s^-1	Group 9	[k313, k315, k1057, k1017, k734, k1058, k1060, k1056]	11.13
k1018	O + CHCH	H2 + C2O	-98.6	3.87e-23	cm^3 molecules^-1 s^-1	Group 179	[k446, k448, k1098, k1018, k737, k1154, k1059, k1081]	17.59
k1019	O + C2H3	H2 + C2OH	-371.04	1.90e-23	cm^3 molecules^-1 s^-1	Group 140	[k1131, k743, k1019, k1155, k749, k1099, k1082, k1061, k1062]	11.60
k1020	O + CH2CH2	H2 + H2CCO	-353.09	4.82e-23	cm^3 molecules^-1 s^-1	Group 153	[k1156, k454, k450, k1020, k452, k1158, k1021, k1132, k1100, k1157]	18.90
k1021	O + CH2CH2	H2 + HCCOH	-212.44	1.24e-23	cm^3 molecules^-1 s^-1	Group 153	[k1156, k454, k450, k1020, k452, k1158, k1021, k1132, k1100, k1157]	4.86
k1022	C + H2O2	H2 + CO2	-975.1	2.95e-23	cm^3 molecules^-1 s^-1	Group 11	[k1022, k324, k1070, k322, k764, k1069, k326, k1068, k1067, k1066]	14.24
k1023	O + H2CO	H2 + CO2	-534.57	4.37e-23	cm^3 molecules^-1 s^-1	Group 183	[k1023, k462, k1163, k460, k766, k1162, k464]	20.74
k1024	O + CH3CH3	H2 + CH2CHOH	-291.83	3.54e-23	cm^3 molecules^-1 s^-1	Group 163	[k466, k1166, k1164, k468, k1026, k1024, k1025, k1134, k1165, k776, k1135, k1103]	11.98
k1025	O + CH3CH3	H2 + CH2OCH2	-218.42	4.76e-23	cm^3 molecules^-1 s^-1	Group 163	[k466, k1166, k1164, k468, k1026, k1024, k1025, k1134, k1165, k776, k1135, k1103]	16.11
k1026	O + CH3CH3	H2 + CH3CHO	-333.48	3.14e-23	cm^3 molecules^-1 s^-1	Group 163	[k466, k1166, k1164, k468, k1026, k1024, k1025, k1134, k1165, k776, k1135, k1103]	10.63
k1027	O + CH2OH	H2 + HOCO	-417.65	2.92e-23	cm^3 molecules^-1 s^-1	Group 156	[k1170, k1027, k794, k1169, k1136, k787, k1167, k803, k1104]	11.02
k1028	O + CH3O	H2 + HOCO	-456.94	3.15e-23	cm^3 molecules^-1 s^-1	Group 170	[k1172, k1028, k795, k1171, k1137, k789, k1168, k805, k1105, k1084]	11.45
k1029	O + CH3OH	H2 + CH2OO	-47.39	3.06e-23	cm^3 molecules^-1 s^-1	Group 175	[k470, k1030, k1176, k472, k1173, k1029, k1174, k1175, k1031, k1138]	19.77
k1030	O + CH3OH	H2 + HCOOH	-427.85	1.92e-23	cm^3 molecules^-1 s^-1	Group 175	[k470, k1030, k1176, k472, k1173, k1029, k1174, k1175, k1031, k1138]	12.41
k1031	O + CH3OH	H2 + H2CO2	55.15	9.82e-26	cm^3 molecules^-1 s^-1	Group 175	[k470, k1030, k1176, k472, k1173, k1029, k1174, k1175, k1031, k1138]	0.06
k1032	O + H2CCO	H2 + C2O2	-186.98	4.66e-23	cm^3 molecules^-1 s^-1	Group 182	[k1032, k1198, k1197, k1196, k1194]	37.48
k1033	O + HCCOH	H2 + C2O2	-327.63	4.98e-23	cm^3 molecules^-1 s^-1	Group 188	[k1033, k1201, k1200, k1195, k1199]	37.18
k1034	O + HOCHCH3	H2 + C2H3O2	-430.68	3.62e-23	cm^3 molecules^-1 s^-1	Group 193	[k1225, k1034, k1147, k864, k1231, k506, k878, k1228, k1233, k890, k1234, k1226, k901, k1227, k1230, k1232, k1146, k1229, k1090, k1148]	9.04
k1035	O + CH3CH2OH	H2 + CH3COOH	-448.05	5.06e-23	cm^3 molecules^-1 s^-1	Group 162	[k1245, k1035, k1250, k514, k508, k1248, k1037, k1039, k510, k1253, k1249, k1041, k512, k1251, k1254, k1244, k1255, k1247, k1113, k1256, k1246, k1257, k924, k1242, k1252]	7.55
k1036	O + CH3OCH3	H2 + CH3COOH	-498.86	1.49e-23	cm^3 molecules^-1 s^-1	Group 173	[k1259, k1036, k1264, k522, k516, k1262, k1038, k1040, k518, k1267, k1263, k1042, k520, k1265, k1268, k1258, k1269, k1261, k1114, k1270, k1243, k1260, k1271, k926, k1266, k1115]	1.90
k1037	O + CH3CH2OH	H2 + HCOOCH3	-376.46	4.39e-23	cm^3 molecules^-1 s^-1	Group 162	[k1245, k1035, k1250, k514, k508, k1248, k1037, k1039, k510, k1253, k1249, k1041, k512, k1251, k1254, k1244, k1255, k1247, k1113, k1256, k1246, k1257, k924, k1242, k1252]	6.55
k1038	O + CH3OCH3	H2 + HCOOCH3	-427.27	4.14e-23	cm^3 molecules^-1 s^-1	Group 173	[k1259, k1036, k1264, k522, k516, k1262, k1038, k1040, k518, k1267, k1263, k1042, k520, k1265, k1268, k1258, k1269, k1261, k1114, k1270, k1243, k1260, k1271, k926, k1266, k1115]	5.27
k1039	O + CH3CH2OH	H2 + OHCH2CHO	-333.99	2.65e-23	cm^3 molecules^-1 s^-1	Group 162	[k1245, k1035, k1250, k514, k508, k1248, k1037, k1039, k510, k1253, k1249, k1041, k512, k1251, k1254, k1244, k1255, k1247, k1113, k1256, k1246, k1257, k924, k1242, k1252]	3.96
k1040	O + CH3OCH3	H2 + OHCH2CHO	-384.8	1.87e-23	cm^3 molecules^-1 s^-1	Group 173	[k1259, k1036, k1264, k522, k516, k1262, k1038, k1040, k518, k1267, k1263, k1042, k520, k1265, k1268, k1258, k1269, k1261, k1114, k1270, k1243, k1260, k1271, k926, k1266, k1115]	2.38
k1041	O + CH3CH2OH	H2 + OHCHCHOH	-302.33	1.52e-23	cm^3 molecules^-1 s^-1	Group 162	[k1245, k1035, k1250, k514, k508, k1248, k1037, k1039, k510, k1253, k1249, k1041, k512, k1251, k1254, k1244, k1255, k1247, k1113, k1256, k1246, k1257, k924, k1242, k1252]	2.27
k1042	O + CH3OCH3	H2 + OHCHCHOH	-353.14	4.93e-23	cm^3 molecules^-1 s^-1	Group 173	[k1259, k1036, k1264, k522, k516, k1262, k1038, k1040, k518, k1267, k1263, k1042, k520, k1265, k1268, k1258, k1269, k1261, k1114, k1270, k1243, k1260, k1271, k926, k1266, k1115]	6.28
k1043	O + CH2OHOH	H2 + H2CO3	-470.0	4.86e-23	cm^3 molecules^-1 s^-1	Group 157	[k1274, k1043, k1276, k1273, k1277, k1275]	59.22
k1044	O + CH3OOH	H2 + H2CO3	-734.29	2.23e-23	cm^3 molecules^-1 s^-1	Group 177	[k1279, k1044, k1281, k1278, k1282, k1272, k1280]	29.49
k1045	O + CH3COOH	H2 + OHCCOOH	-245.31	2.80e-23	cm^3 molecules^-1 s^-1	Group 169	[k1339, k1045, k1337, k1344, k1343, k1341, k1331, k1338, k1333, k1342, k1345, k1335, k1340]	8.37
k1046	O + HCOOCH3	H2 + OHCCOOH	-316.9	3.41e-23	cm^3 molecules^-1 s^-1	Group 190	[k1352, k1046, k1350, k1357, k1332, k1356, k1354, k1351, k1346, k1355, k1358, k1348, k1353]	8.86
k1047	O + OHCH2CHO	H2 + OHCCOOH	-359.37	3.06e-23	cm^3 molecules^-1 s^-1	Group 197	[k1363, k1047, k1361, k1368, k1334, k1367, k1365, k1347, k1362, k1366, k1369, k1359, k1364]	10.45
k1048	O + OHCHCHOH	H2 + OHCCOOH	-391.03	4.52e-23	cm^3 molecules^-1 s^-1	Group 198	[k1372, k1048, k1370, k1377, k1336, k1376, k1374, k1349, k1371, k1360, k1375, k1378, k1373]	11.53
k1049	C + OH	CH + O	90.99	7.50e-24	cm^3 molecules^-1 s^-1	Single (order=2)	-	100.00
k1050	CH + O	C + OH	-90.99	8.36e-24	cm^3 molecules^-1 s^-1	Single (order=2)	-	100.00
k1051	C + H2O	CH + OH	157.6	9.75e-26	cm^3 molecules^-1 s^-1	Group 10	[k1051, k1052]	74.83
k1052	C + H2O	CH2 + O	165.38	3.28e-26	cm^3 molecules^-1 s^-1	Group 10	[k1051, k1052]	25.17
k1053	CH2 + O	C + H2O	-165.38	1.48e-23	cm^3 molecules^-1 s^-1	Group 30	[k1053, k1079]	64.35
k1054	C + HCO	CH + CO	-273.75	2.93e-23	cm^3 molecules^-1 s^-1	Group 12	[k311, k1054, k1055]	55.02
k1055	C + HCO	OH + C2	104.5	1.51e-25	cm^3 molecules^-1 s^-1	Group 12	[k311, k1054, k1055]	0.28
k1056	C + H2CO	CH + HCO	28.19	1.28e-25	cm^3 molecules^-1 s^-1	Group 9	[k313, k315, k1057, k1017, k734, k1058, k1060, k1056]	0.04
k1057	C + H2CO	CH2 + CO	-328.77	3.17e-23	cm^3 molecules^-1 s^-1	Group 9	[k313, k315, k1057, k1017, k734, k1058, k1060, k1056]	11.13
k1058	C + H2CO	O + CHCH	-130.3	4.66e-23	cm^3 molecules^-1 s^-1	Group 9	[k313, k315, k1057, k1017, k734, k1058, k1060, k1056]	16.37
k1059	O + CHCH	C + H2CO	130.3	2.80e-23	cm^3 molecules^-1 s^-1	Group 179	[k446, k448, k1098, k1018, k737, k1154, k1059, k1081]	12.73
k1060	C + H2CO	H2O + C2	-24.91	4.65e-23	cm^3 molecules^-1 s^-1	Group 9	[k313, k315, k1057, k1017, k734, k1058, k1060, k1056]	16.33
k1061	O + C2H3	C + CH2OH	152.93	1.04e-25	cm^3 molecules^-1 s^-1	Group 140	[k1131, k743, k1019, k1155, k749, k1099, k1082, k1061, k1062]	0.06
k1062	O + C2H3	C + CH3O	192.22	4.45e-26	cm^3 molecules^-1 s^-1	Group 140	[k1131, k743, k1019, k1155, k749, k1099, k1082, k1061, k1062]	0.03
k1063	C + HO2	CH + O2	-133.71	2.89e-23	cm^3 molecules^-1 s^-1	Group 13	[k320, k751, k1065, k1064, k1063]	21.42
k1064	C + HO2	O + HCO	-438.32	1.29e-23	cm^3 molecules^-1 s^-1	Group 13	[k320, k751, k1065, k1064, k1063]	9.56
k1065	C + HO2	OH + CO	-803.06	3.46e-23	cm^3 molecules^-1 s^-1	Group 13	[k320, k751, k1065, k1064, k1063]	25.65
k1066	C + H2O2	CH + HO2	25.98	1.54e-25	cm^3 molecules^-1 s^-1	Group 11	[k1022, k324, k1070, k322, k764, k1069, k326, k1068, k1067, k1066]	0.07
k1067	C + H2O2	CH2 + O2	-190.94	1.59e-24	cm^3 molecules^-1 s^-1	Group 11	[k1022, k324, k1070, k322, k764, k1069, k326, k1068, k1067, k1066]	0.77
k1068	C + H2O2	O + H2CO	-440.53	2.42e-25	cm^3 molecules^-1 s^-1	Group 11	[k1022, k324, k1070, k322, k764, k1069, k326, k1068, k1067, k1066]	0.12
k1069	C + H2O2	OH + HCO	-503.33	5.00e-23	cm^3 molecules^-1 s^-1	Group 11	[k1022, k324, k1070, k322, k764, k1069, k326, k1068, k1067, k1066]	24.13
k1070	C + H2O2	H2O + CO	-934.68	2.39e-23	cm^3 molecules^-1 s^-1	Group 11	[k1022, k324, k1070, k322, k764, k1069, k326, k1068, k1067, k1066]	11.54
k1071	C + C2OH	CH + C2O	81.49	2.25e-25	cm^3 molecules^-1 s^-1	Group 3	[k328, k1072, k1071]	0.37
k1072	C + C2OH	C2 + HCO	-27.08	4.27e-23	cm^3 molecules^-1 s^-1	Group 3	[k328, k1072, k1071]	69.40
k1073	O + C3H4	C + CH2CHOH	158.51	2.85e-23	cm^3 molecules^-1 s^-1	Group 148	[k1184, k1182, k1179, k1140, k1183, k1107, k1180, k1108, k1074, k1073, k1181]	7.43
k1074	O + C3H4	C + CH3CHO	116.86	3.17e-23	cm^3 molecules^-1 s^-1	Group 148	[k1184, k1182, k1179, k1140, k1183, k1107, k1180, k1108, k1074, k1073, k1181]	8.26
k1075	C + HOCO	CH + CO2	-330.5	6.32e-25	cm^3 molecules^-1 s^-1	Group 14	[k1076, k1075, k827]	2.10
k1076	C + HOCO	CO + HCO	-602.64	2.93e-23	cm^3 molecules^-1 s^-1	Group 14	[k1076, k1075, k827]	97.40
k1077	O + CH2CHOH	C + CH2OHOH	198.78	1.03e-25	cm^3 molecules^-1 s^-1	Group 154	[k1206, k476, k478, k480, k1209, k482, k1143, k1110, k1210, k1204, k1207, k1202, k1208, k1077]	0.03
k1078	O + CH2OCH2	C + CH2OHOH	125.37	7.21e-25	cm^3 molecules^-1 s^-1	Group 155	[k1213, k484, k486, k488, k1216, k490, k1144, k1111, k1217, k1211, k1214, k1203, k1215, k1078, k1109]	0.20
k1079	CH2 + O	CH + OH	-7.78	8.20e-24	cm^3 molecules^-1 s^-1	Group 30	[k1053, k1079]	35.65
k1080	CH3 + O	CH + H2O	-42.77	9.48e-25	cm^3 molecules^-1 s^-1	Group 38	[k419, k421, k1015, k720, k1080, k1097]	0.91
k1081	O + CHCH	CH + HCO	158.49	8.03e-25	cm^3 molecules^-1 s^-1	Group 179	[k446, k448, k1098, k1018, k737, k1154, k1059, k1081]	0.36
k1082	O + C2H3	CH + H2CO	-60.65	1.38e-23	cm^3 molecules^-1 s^-1	Group 140	[k1131, k743, k1019, k1155, k749, k1099, k1082, k1061, k1062]	8.43
k1083	O + C2H5	CH + CH3OH	24.57	7.76e-24	cm^3 molecules^-1 s^-1	Group 142	[k458, k1160, k1133, k1161, k1101, k1083, k1102]	5.04
k1084	O + CH3O	CH + H2O2	187.66	1.73e-25	cm^3 molecules^-1 s^-1	Group 170	[k1172, k1028, k795, k1171, k1137, k789, k1168, k805, k1105, k1084]	0.06
k1085	O + C3H3	CH + H2CCO	-53.42	2.32e-25	cm^3 molecules^-1 s^-1	Group 147	[k1178, k1177, k1139, k1085, k1106, k1086]	0.41
k1086	O + C3H3	CH + HCCOH	87.23	3.08e-25	cm^3 molecules^-1 s^-1	Group 147	[k1178, k1177, k1139, k1085, k1106, k1086]	0.54
k1087	O + C3H5	CH + CH2CHOH	52.66	1.05e-25	cm^3 molecules^-1 s^-1	Group 149	[k474, k1192, k1193, k1141, k1186, k1188, k1191, k1189, k1187, k1142, k1190, k1089, k1087, k1088]	0.03
k1088	O + C3H5	CH + CH2OCH2	126.07	1.35e-25	cm^3 molecules^-1 s^-1	Group 149	[k474, k1192, k1193, k1141, k1186, k1188, k1191, k1189, k1187, k1142, k1190, k1089, k1087, k1088]	0.03
k1089	O + C3H5	CH + CH3CHO	11.01	1.01e-23	cm^3 molecules^-1 s^-1	Group 149	[k474, k1192, k1193, k1141, k1186, k1188, k1191, k1189, k1187, k1142, k1190, k1089, k1087, k1088]	2.60
k1090	O + HOCHCH3	CH + CH2OHOH	9.69	3.19e-23	cm^3 molecules^-1 s^-1	Group 193	[k1225, k1034, k1147, k864, k1231, k506, k878, k1228, k1233, k890, k1234, k1226, k901, k1227, k1230, k1232, k1146, k1229, k1090, k1148]	7.97
k1091	O + C3OH	CH + C2O2	70.19	1.34e-24	cm^3 molecules^-1 s^-1	Group 152	[k1285, k985, k1283, k1286, k1091, k1284]	1.40
k1092	O + CH3COCH2	CH + CH3COOH	-54.05	4.30e-23	cm^3 molecules^-1 s^-1	Group 167	[k1295, k1290, k1291, k1294, k1292, k1288, k1296, k1298, k1301, k1293, k1297, k1299, k1116, k1092, k1300, k1302, k1303, k1093, k1094, k1287, k1095, k1289]	6.18
k1093	O + CH3COCH2	CH + HCOOCH3	17.54	1.67e-23	cm^3 molecules^-1 s^-1	Group 167	[k1295, k1290, k1291, k1294, k1292, k1288, k1296, k1298, k1301, k1293, k1297, k1299, k1116, k1092, k1300, k1302, k1303, k1093, k1094, k1287, k1095, k1289]	2.40
k1094	O + CH3COCH2	CH + OHCH2CHO	60.01	5.24e-23	cm^3 molecules^-1 s^-1	Group 167	[k1295, k1290, k1291, k1294, k1292, k1288, k1296, k1298, k1301, k1293, k1297, k1299, k1116, k1092, k1300, k1302, k1303, k1093, k1094, k1287, k1095, k1289]	7.53
k1095	O + CH3COCH2	CH + OHCHCHOH	91.67	9.60e-25	cm^3 molecules^-1 s^-1	Group 167	[k1295, k1290, k1291, k1294, k1292, k1288, k1296, k1298, k1301, k1293, k1297, k1299, k1116, k1092, k1300, k1302, k1303, k1093, k1094, k1287, k1095, k1289]	0.14
k1096	O + C2H3O2	CH + H2CO3	-29.63	3.21e-23	cm^3 molecules^-1 s^-1	Group 141	[k1326, k1327, k1323, k1121, k1325, k994, k1328, k1150, k1096, k1330, k1322, k1329, k1324]	8.49
k1097	CH3 + O	CH2 + OH	31.62	1.52e-25	cm^3 molecules^-1 s^-1	Group 38	[k419, k421, k1015, k720, k1080, k1097]	0.15
k1098	O + CHCH	CH2 + CO	-198.47	1.99e-23	cm^3 molecules^-1 s^-1	Group 179	[k446, k448, k1098, k1018, k737, k1154, k1059, k1081]	9.05
k1099	O + C2H3	CH2 + HCO	-115.67	1.83e-23	cm^3 molecules^-1 s^-1	Group 140	[k1131, k743, k1019, k1155, k749, k1099, k1082, k1061, k1062]	11.18
k1100	O + CH2CH2	CH2 + H2CO	-22.06	1.12e-25	cm^3 molecules^-1 s^-1	Group 153	[k1156, k454, k450, k1020, k452, k1158, k1021, k1132, k1100, k1157]	0.04
k1101	O + C2H5	CH2 + CH2OH	2.46	1.05e-23	cm^3 molecules^-1 s^-1	Group 142	[k458, k1160, k1133, k1161, k1101, k1083, k1102]	6.82
k1102	O + C2H5	CH2 + CH3O	41.75	8.87e-26	cm^3 molecules^-1 s^-1	Group 142	[k458, k1160, k1133, k1161, k1101, k1083, k1102]	0.06
k1103	O + CH3CH3	CH2 + CH3OH	22.56	4.74e-25	cm^3 molecules^-1 s^-1	Group 163	[k466, k1166, k1164, k468, k1026, k1024, k1025, k1134, k1165, k776, k1135, k1103]	0.16
k1104	O + CH2OH	CH2 + HO2	169.72	1.05e-25	cm^3 molecules^-1 s^-1	Group 156	[k1170, k1027, k794, k1169, k1136, k787, k1167, k803, k1104]	0.04
k1105	O + CH3O	CH2 + HO2	130.43	5.59e-26	cm^3 molecules^-1 s^-1	Group 170	[k1172, k1028, k795, k1171, k1137, k789, k1168, k805, k1105, k1084]	0.02
k1106	O + C3H3	CH2 + C2OH	-32.78	1.37e-24	cm^3 molecules^-1 s^-1	Group 147	[k1178, k1177, k1139, k1085, k1106, k1086]	2.40
k1107	O + C3H4	CH2 + H2CCO	-93.82	3.49e-23	cm^3 molecules^-1 s^-1	Group 148	[k1184, k1182, k1179, k1140, k1183, k1107, k1180, k1108, k1074, k1073, k1181]	9.10
k1108	O + C3H4	CH2 + HCCOH	46.83	5.24e-23	cm^3 molecules^-1 s^-1	Group 148	[k1184, k1182, k1179, k1140, k1183, k1107, k1180, k1108, k1074, k1073, k1181]	13.66
k1109	O + CH2OCH2	CH2 + CH2OO	193.59	1.84e-25	cm^3 molecules^-1 s^-1	Group 155	[k1213, k484, k486, k488, k1216, k490, k1144, k1111, k1217, k1211, k1214, k1203, k1215, k1078, k1109]	0.05
k1110	O + CH2CHOH	CH2 + HCOOH	-113.46	8.99e-24	cm^3 molecules^-1 s^-1	Group 154	[k1206, k476, k478, k480, k1209, k482, k1143, k1110, k1210, k1204, k1207, k1202, k1208, k1077]	2.35
k1111	O + CH2OCH2	CH2 + HCOOH	-186.87	4.05e-23	cm^3 molecules^-1 s^-1	Group 155	[k1213, k484, k486, k488, k1216, k490, k1144, k1111, k1217, k1211, k1214, k1203, k1215, k1078, k1109]	11.09
k1112	O + CH3CHO	CH2 + HCOOH	-71.81	3.58e-23	cm^3 molecules^-1 s^-1	Group 164	[k1218, k492, k494, k496, k1220, k498, k1145, k1112, k1221, k1219, k1205, k1212]	11.82
k1113	O + CH3CH2OH	CH2 + CH2OHOH	-17.63	2.01e-23	cm^3 molecules^-1 s^-1	Group 162	[k1245, k1035, k1250, k514, k508, k1248, k1037, k1039, k510, k1253, k1249, k1041, k512, k1251, k1254, k1244, k1255, k1247, k1113, k1256, k1246, k1257, k924, k1242, k1252]	3.00
k1114	O + CH3OCH3	CH2 + CH2OHOH	-68.44	1.68e-23	cm^3 molecules^-1 s^-1	Group 173	[k1259, k1036, k1264, k522, k516, k1262, k1038, k1040, k518, k1267, k1263, k1042, k520, k1265, k1268, k1258, k1269, k1261, k1114, k1270, k1243, k1260, k1271, k926, k1266, k1115]	2.14
k1115	O + CH3OCH3	CH2 + CH3OOH	195.85	7.56e-26	cm^3 molecules^-1 s^-1	Group 173	[k1259, k1036, k1264, k522, k516, k1262, k1038, k1040, k518, k1267, k1263, k1042, k520, k1265, k1268, k1258, k1269, k1261, k1114, k1270, k1243, k1260, k1271, k926, k1266, k1115]	0.01
k1116	O + CH3COCH2	CH2 + C2H3O2	-64.0	2.76e-23	cm^3 molecules^-1 s^-1	Group 167	[k1295, k1290, k1291, k1294, k1292, k1288, k1296, k1298, k1301, k1293, k1297, k1299, k1116, k1092, k1300, k1302, k1303, k1093, k1094, k1287, k1095, k1289]	3.97
k1117	O + CH3COCH3	CH2 + CH3COOH	-74.33	3.25e-23	cm^3 molecules^-1 s^-1	Group 168	[k1317, k1307, k1310, k1308, k1316, k1318, k1314, k1305, k1315, k1319, k1149, k1313, k1117, k1312, k1304, k1118, k1321, k1309, k1119, k1306, k1120, k1311, k1320]	5.05
k1118	O + CH3COCH3	CH2 + HCOOCH3	-2.74	4.28e-23	cm^3 molecules^-1 s^-1	Group 168	[k1317, k1307, k1310, k1308, k1316, k1318, k1314, k1305, k1315, k1319, k1149, k1313, k1117, k1312, k1304, k1118, k1321, k1309, k1119, k1306, k1120, k1311, k1320]	6.65
k1119	O + CH3COCH3	CH2 + OHCH2CHO	39.73	2.44e-23	cm^3 molecules^-1 s^-1	Group 168	[k1317, k1307, k1310, k1308, k1316, k1318, k1314, k1305, k1315, k1319, k1149, k1313, k1117, k1312, k1304, k1118, k1321, k1309, k1119, k1306, k1120, k1311, k1320]	3.79
k1120	O + CH3COCH3	CH2 + OHCHCHOH	71.39	5.05e-23	cm^3 molecules^-1 s^-1	Group 168	[k1317, k1307, k1310, k1308, k1316, k1318, k1314, k1305, k1315, k1319, k1149, k1313, k1117, k1312, k1304, k1118, k1321, k1309, k1119, k1306, k1120, k1311, k1320]	7.84
k1121	O + C2H3O2	CH2 + HCO3	-348.39	2.61e-23	cm^3 molecules^-1 s^-1	Group 141	[k1326, k1327, k1323, k1121, k1325, k994, k1328, k1150, k1096, k1330, k1322, k1329, k1324]	6.91
k1122	O + CH3CHOHCH3	CH2 + CH3CHOHOH	40.19	3.77e-23	cm^3 molecules^-1 s^-1	Group 165	[k1383, k1393, k1387, k1384, k1385, k524, k1400, k1386, k1390, k1388, k1398, k1391, k1399, k1397, k1392, k1389, k1395, k1396, k1151, k1381, k1128, k1122, k1394, k1379, k1125]	4.74
k1123	O + CH3OCH2CH3	CH2 + CH3CHOHOH	-13.7	4.06e-23	cm^3 molecules^-1 s^-1	Group 171	[k1403, k1413, k1407, k1404, k1405, k526, k1420, k1406, k1410, k1408, k1418, k1411, k1419, k1417, k1412, k1409, k1415, k1416, k1380, k1152, k1401, k1129, k1123, k1414, k1126]	5.20
k1124	O + CH3CH2CH2OH	CH2 + CH3CHOHOH	22.78	1.24e-23	cm^3 molecules^-1 s^-1	Group 159	[k1421, k1431, k1425, k1422, k1423, k528, k1438, k1424, k1428, k1426, k1436, k1429, k1437, k1435, k1430, k1427, k1433, k1434, k1382, k1153, k1130, k1124, k1432, k1402, k1127]	2.03
k1125	O + CH3CHOHCH3	CH2 + CH3OCH2OH	94.65	1.22e-25	cm^3 molecules^-1 s^-1	Group 165	[k1383, k1393, k1387, k1384, k1385, k524, k1400, k1386, k1390, k1388, k1398, k1391, k1399, k1397, k1392, k1389, k1395, k1396, k1151, k1381, k1128, k1122, k1394, k1379, k1125]	0.02
k1126	O + CH3OCH2CH3	CH2 + CH3OCH2OH	40.76	2.67e-26	cm^3 molecules^-1 s^-1	Group 171	[k1403, k1413, k1407, k1404, k1405, k526, k1420, k1406, k1410, k1408, k1418, k1411, k1419, k1417, k1412, k1409, k1415, k1416, k1380, k1152, k1401, k1129, k1123, k1414, k1126]	0.00
k1127	O + CH3CH2CH2OH	CH2 + CH3OCH2OH	77.24	6.35e-25	cm^3 molecules^-1 s^-1	Group 159	[k1421, k1431, k1425, k1422, k1423, k528, k1438, k1424, k1428, k1426, k1436, k1429, k1437, k1435, k1430, k1427, k1433, k1434, k1382, k1153, k1130, k1124, k1432, k1402, k1127]	0.10
k1128	O + CH3CHOHCH3	CH2 + HOCH2CH2OH	23.22	4.67e-23	cm^3 molecules^-1 s^-1	Group 165	[k1383, k1393, k1387, k1384, k1385, k524, k1400, k1386, k1390, k1388, k1398, k1391, k1399, k1397, k1392, k1389, k1395, k1396, k1151, k1381, k1128, k1122, k1394, k1379, k1125]	5.87
k1129	O + CH3OCH2CH3	CH2 + HOCH2CH2OH	-30.67	4.25e-23	cm^3 molecules^-1 s^-1	Group 171	[k1403, k1413, k1407, k1404, k1405, k526, k1420, k1406, k1410, k1408, k1418, k1411, k1419, k1417, k1412, k1409, k1415, k1416, k1380, k1152, k1401, k1129, k1123, k1414, k1126]	5.44
k1130	O + CH3CH2CH2OH	CH2 + HOCH2CH2OH	5.81	3.41e-23	cm^3 molecules^-1 s^-1	Group 159	[k1421, k1431, k1425, k1422, k1423, k528, k1438, k1424, k1428, k1426, k1436, k1429, k1437, k1435, k1430, k1427, k1433, k1434, k1382, k1153, k1130, k1124, k1432, k1402, k1127]	5.59
k1131	O + C2H3	CH3 + CO	-512.03	1.08e-23	cm^3 molecules^-1 s^-1	Group 140	[k1131, k743, k1019, k1155, k749, k1099, k1082, k1061, k1062]	6.60
k1132	O + CH2CH2	CH3 + HCO	-116.48	1.24e-25	cm^3 molecules^-1 s^-1	Group 153	[k1156, k454, k450, k1020, k452, k1158, k1021, k1132, k1100, k1157]	0.05
k1133	O + C2H5	CH3 + H2CO	-333.73	3.67e-23	cm^3 molecules^-1 s^-1	Group 142	[k458, k1160, k1133, k1161, k1101, k1083, k1102]	23.82
k1134	O + CH3CH3	CH3 + CH2OH	-38.95	4.93e-23	cm^3 molecules^-1 s^-1	Group 163	[k466, k1166, k1164, k468, k1026, k1024, k1025, k1134, k1165, k776, k1135, k1103]	16.69
k1135	O + CH3CH3	CH3 + CH3O	0.34	1.87e-24	cm^3 molecules^-1 s^-1	Group 163	[k466, k1166, k1164, k468, k1026, k1024, k1025, k1134, k1165, k776, k1135, k1103]	0.63
k1136	O + CH2OH	CH3 + O2	-86.6	4.14e-23	cm^3 molecules^-1 s^-1	Group 156	[k1170, k1027, k794, k1169, k1136, k787, k1167, k803, k1104]	15.62
k1137	O + CH3O	CH3 + O2	-125.89	2.52e-23	cm^3 molecules^-1 s^-1	Group 170	[k1172, k1028, k795, k1171, k1137, k789, k1168, k805, k1105, k1084]	9.16
k1138	O + CH3OH	CH3 + HO2	108.21	1.12e-25	cm^3 molecules^-1 s^-1	Group 175	[k470, k1030, k1176, k472, k1173, k1029, k1174, k1175, k1031, k1138]	0.07
k1139	O + C3H3	CH3 + C2O	-73.9	1.48e-25	cm^3 molecules^-1 s^-1	Group 147	[k1178, k1177, k1139, k1085, k1106, k1086]	0.26
k1140	O + C3H4	CH3 + C2OH	-112.58	4.82e-23	cm^3 molecules^-1 s^-1	Group 148	[k1184, k1182, k1179, k1140, k1183, k1107, k1180, k1108, k1074, k1073, k1181]	12.56
k1141	O + C3H5	CH3 + H2CCO	-322.28	1.91e-23	cm^3 molecules^-1 s^-1	Group 149	[k474, k1192, k1193, k1141, k1186, k1188, k1191, k1189, k1187, k1142, k1190, k1089, k1087, k1088]	4.91
k1142	O + C3H5	CH3 + HCCOH	-181.63	5.22e-23	cm^3 molecules^-1 s^-1	Group 149	[k474, k1192, k1193, k1141, k1186, k1188, k1191, k1189, k1187, k1142, k1190, k1089, k1087, k1088]	13.43
k1143	O + CH2CHOH	CH3 + HOCO	-164.77	4.59e-23	cm^3 molecules^-1 s^-1	Group 154	[k1206, k476, k478, k480, k1209, k482, k1143, k1110, k1210, k1204, k1207, k1202, k1208, k1077]	11.99
k1144	O + CH2OCH2	CH3 + HOCO	-238.18	8.52e-24	cm^3 molecules^-1 s^-1	Group 155	[k1213, k484, k486, k488, k1216, k490, k1144, k1111, k1217, k1211, k1214, k1203, k1215, k1078, k1109]	2.33
k1145	O + CH3CHO	CH3 + HOCO	-123.12	4.70e-23	cm^3 molecules^-1 s^-1	Group 164	[k1218, k492, k494, k496, k1220, k498, k1145, k1112, k1221, k1219, k1205, k1212]	15.52
k1146	O + HOCHCH3	CH3 + CH2OO	-44.7	5.23e-23	cm^3 molecules^-1 s^-1	Group 193	[k1225, k1034, k1147, k864, k1231, k506, k878, k1228, k1233, k890, k1234, k1226, k901, k1227, k1230, k1232, k1146, k1229, k1090, k1148]	13.06
k1147	O + HOCHCH3	CH3 + HCOOH	-425.16	1.63e-23	cm^3 molecules^-1 s^-1	Group 193	[k1225, k1034, k1147, k864, k1231, k506, k878, k1228, k1233, k890, k1234, k1226, k901, k1227, k1230, k1232, k1146, k1229, k1090, k1148]	4.07
k1148	O + HOCHCH3	CH3 + H2CO2	57.84	1.00e-24	cm^3 molecules^-1 s^-1	Group 193	[k1225, k1034, k1147, k864, k1231, k506, k878, k1228, k1233, k890, k1234, k1226, k901, k1227, k1230, k1232, k1146, k1229, k1090, k1148]	0.25
k1149	O + CH3COCH3	CH3 + C2H3O2	-123.68	8.70e-24	cm^3 molecules^-1 s^-1	Group 168	[k1317, k1307, k1310, k1308, k1316, k1318, k1314, k1305, k1315, k1319, k1149, k1313, k1117, k1312, k1304, k1118, k1321, k1309, k1119, k1306, k1120, k1311, k1320]	1.35
k1150	O + C2H3O2	CH3 + CO3	-29.97	1.87e-23	cm^3 molecules^-1 s^-1	Group 141	[k1326, k1327, k1323, k1121, k1325, k994, k1328, k1150, k1096, k1330, k1322, k1329, k1324]	4.95
k1151	O + CH3CHOHCH3	CH3 + CH3OCHOH	7.61	1.66e-23	cm^3 molecules^-1 s^-1	Group 165	[k1383, k1393, k1387, k1384, k1385, k524, k1400, k1386, k1390, k1388, k1398, k1391, k1399, k1397, k1392, k1389, k1395, k1396, k1151, k1381, k1128, k1122, k1394, k1379, k1125]	2.09
k1152	O + CH3OCH2CH3	CH3 + CH3OCHOH	-46.28	5.27e-23	cm^3 molecules^-1 s^-1	Group 171	[k1403, k1413, k1407, k1404, k1405, k526, k1420, k1406, k1410, k1408, k1418, k1411, k1419, k1417, k1412, k1409, k1415, k1416, k1380, k1152, k1401, k1129, k1123, k1414, k1126]	6.75
k1153	O + CH3CH2CH2OH	CH3 + CH3OCHOH	-9.8	3.45e-23	cm^3 molecules^-1 s^-1	Group 159	[k1421, k1431, k1425, k1422, k1423, k528, k1438, k1424, k1428, k1426, k1436, k1429, k1437, k1435, k1430, k1427, k1433, k1434, k1382, k1153, k1130, k1124, k1432, k1402, k1127]	5.65
k1154	O + CHCH	H2O + C2	105.39	1.78e-23	cm^3 molecules^-1 s^-1	Group 179	[k446, k448, k1098, k1018, k737, k1154, k1059, k1081]	8.09
k1155	O + C2H3	OH + CHCH	-281.94	3.50e-23	cm^3 molecules^-1 s^-1	Group 140	[k1131, k743, k1019, k1155, k749, k1099, k1082, k1061, k1062]	21.37
k1156	O + CH2CH2	CH4 + CO	-488.08	4.12e-23	cm^3 molecules^-1 s^-1	Group 153	[k1156, k454, k450, k1020, k452, k1158, k1021, k1132, k1100, k1157]	16.16
k1157	O + CH2CH2	OH + C2H3	30.81	1.58e-25	cm^3 molecules^-1 s^-1	Group 153	[k1156, k454, k450, k1020, k452, k1158, k1021, k1132, k1100, k1157]	0.06
k1158	O + CH2CH2	H2O + CHCH	-317.74	4.94e-23	cm^3 molecules^-1 s^-1	Group 153	[k1156, k454, k450, k1020, k452, k1158, k1021, k1132, k1100, k1157]	19.37
k1159	O + HCO	OH + CO	-364.74	2.01e-25	cm^3 molecules^-1 s^-1	Group 189	[k456, k752, k1159]	0.83
k1160	O + C2H5	CH4 + HCO	-403.39	1.88e-23	cm^3 molecules^-1 s^-1	Group 142	[k458, k1160, k1133, k1161, k1101, k1083, k1102]	12.20
k1161	O + C2H5	OH + CH2CH2	-280.05	5.05e-23	cm^3 molecules^-1 s^-1	Group 142	[k458, k1160, k1133, k1161, k1101, k1083, k1102]	32.78
k1162	O + H2CO	OH + HCO	-62.8	1.91e-23	cm^3 molecules^-1 s^-1	Group 183	[k1023, k462, k1163, k460, k766, k1162, k464]	9.06
k1163	O + H2CO	H2O + CO	-494.15	3.76e-23	cm^3 molecules^-1 s^-1	Group 183	[k1023, k462, k1163, k460, k766, k1162, k464]	17.84
k1164	O + CH3CH3	CH4 + H2CO	-350.38	3.16e-23	cm^3 molecules^-1 s^-1	Group 163	[k466, k1166, k1164, k468, k1026, k1024, k1025, k1134, k1165, k776, k1135, k1103]	10.70
k1165	O + CH3CH3	OH + C2H5	-9.79	1.15e-23	cm^3 molecules^-1 s^-1	Group 163	[k466, k1166, k1164, k468, k1026, k1024, k1025, k1134, k1165, k776, k1135, k1103]	3.89
k1166	O + CH3CH3	H2O + CH2CH2	-356.45	9.24e-24	cm^3 molecules^-1 s^-1	Group 163	[k466, k1166, k1164, k468, k1026, k1024, k1025, k1134, k1165, k776, k1135, k1103]	3.13
k1167	O + CH2OH	O + CH3O	39.29	4.32e-23	cm^3 molecules^-1 s^-1	Group 156	[k1170, k1027, k794, k1169, k1136, k787, k1167, k803, k1104]	16.30
k1168	O + CH3O	O + CH2OH	-39.29	5.00e-23	cm^3 molecules^-1 s^-1	Group 170	[k1172, k1028, k795, k1171, k1137, k789, k1168, k805, k1105, k1084]	18.18
k1169	O + CH2OH	OH + H2CO	-304.57	5.24e-23	cm^3 molecules^-1 s^-1	Group 156	[k1170, k1027, k794, k1169, k1136, k787, k1167, k803, k1104]	19.77
k1170	O + CH2OH	H2O + HCO	-433.98	1.57e-23	cm^3 molecules^-1 s^-1	Group 156	[k1170, k1027, k794, k1169, k1136, k787, k1167, k803, k1104]	5.92
k1171	O + CH3O	OH + H2CO	-343.86	5.07e-23	cm^3 molecules^-1 s^-1	Group 170	[k1172, k1028, k795, k1171, k1137, k789, k1168, k805, k1105, k1084]	18.43
k1172	O + CH3O	H2O + HCO	-473.27	2.93e-23	cm^3 molecules^-1 s^-1	Group 170	[k1172, k1028, k795, k1171, k1137, k789, k1168, k805, k1105, k1084]	10.65
k1173	O + CH3OH	CH4 + O2	-123.35	1.33e-23	cm^3 molecules^-1 s^-1	Group 175	[k470, k1030, k1176, k472, k1173, k1029, k1174, k1175, k1031, k1138]	8.59
k1174	O + CH3OH	OH + CH2OH	-29.89	3.01e-23	cm^3 molecules^-1 s^-1	Group 175	[k470, k1030, k1176, k472, k1173, k1029, k1174, k1175, k1031, k1138]	19.45
k1175	O + CH3OH	OH + CH3O	9.4	7.44e-24	cm^3 molecules^-1 s^-1	Group 175	[k470, k1030, k1176, k472, k1173, k1029, k1174, k1175, k1031, k1138]	4.81
k1176	O + CH3OH	H2O + H2CO	-401.07	1.96e-23	cm^3 molecules^-1 s^-1	Group 175	[k470, k1030, k1176, k472, k1173, k1029, k1174, k1175, k1031, k1138]	12.67
k1177	O + C3H3	CHCH + HCO	-330.63	2.81e-24	cm^3 molecules^-1 s^-1	Group 147	[k1178, k1177, k1139, k1085, k1106, k1086]	4.92
k1178	O + C3H3	C2H3 + CO	-413.43	5.23e-23	cm^3 molecules^-1 s^-1	Group 147	[k1178, k1177, k1139, k1085, k1106, k1086]	91.48
k1179	O + C3H4	CH4 + C2O	-128.94	4.40e-23	cm^3 molecules^-1 s^-1	Group 148	[k1184, k1182, k1179, k1140, k1183, k1107, k1180, k1108, k1074, k1073, k1181]	11.47
k1180	O + C3H4	OH + C3H3	-48.18	2.87e-23	cm^3 molecules^-1 s^-1	Group 148	[k1184, k1182, k1179, k1140, k1183, k1107, k1180, k1108, k1074, k1073, k1181]	7.48
k1181	O + C3H4	C2 + CH3OH	190.45	1.92e-23	cm^3 molecules^-1 s^-1	Group 148	[k1184, k1182, k1179, k1140, k1183, k1107, k1180, k1108, k1074, k1073, k1181]	5.00
k1182	O + C3H4	CHCH + H2CO	-316.01	3.34e-23	cm^3 molecules^-1 s^-1	Group 148	[k1184, k1182, k1179, k1140, k1183, k1107, k1180, k1108, k1074, k1073, k1181]	8.70
k1183	O + C3H4	C2H3 + HCO	-96.87	1.60e-23	cm^3 molecules^-1 s^-1	Group 148	[k1184, k1182, k1179, k1140, k1183, k1107, k1180, k1108, k1074, k1073, k1181]	4.17
k1184	O + C3H4	CO + CH2CH2	-492.42	4.67e-23	cm^3 molecules^-1 s^-1	Group 148	[k1184, k1182, k1179, k1140, k1183, k1107, k1180, k1108, k1074, k1073, k1181]	12.17
k1185	O + C2OH	OH + C2O	-9.5	1.59e-23	cm^3 molecules^-1 s^-1	Single (order=2)	-	100.00
k1186	O + C3H5	CH4 + C2OH	-316.28	4.74e-23	cm^3 molecules^-1 s^-1	Group 149	[k474, k1192, k1193, k1141, k1186, k1188, k1191, k1189, k1187, k1142, k1190, k1089, k1087, k1088]	12.20
k1187	O + C3H5	OH + C3H4	-196.84	2.53e-23	cm^3 molecules^-1 s^-1	Group 149	[k474, k1192, k1193, k1141, k1186, k1188, k1191, k1189, k1187, k1142, k1190, k1089, k1087, k1088]	6.51
k1188	O + C3H5	H2O + C3H3	-311.63	2.89e-23	cm^3 molecules^-1 s^-1	Group 149	[k474, k1192, k1193, k1141, k1186, k1188, k1191, k1189, k1187, k1142, k1190, k1089, k1087, k1088]	7.44
k1189	O + C3H5	CHCH + CH2OH	-208.28	1.96e-23	cm^3 molecules^-1 s^-1	Group 149	[k474, k1192, k1193, k1141, k1186, k1188, k1191, k1189, k1187, k1142, k1190, k1089, k1087, k1088]	5.04
k1190	O + C3H5	CHCH + CH3O	-168.99	3.46e-23	cm^3 molecules^-1 s^-1	Group 149	[k474, k1192, k1193, k1141, k1186, k1188, k1191, k1189, k1187, k1142, k1190, k1089, k1087, k1088]	8.90
k1191	O + C3H5	C2H3 + H2CO	-230.91	5.26e-23	cm^3 molecules^-1 s^-1	Group 149	[k474, k1192, k1193, k1141, k1186, k1188, k1191, k1189, k1187, k1142, k1190, k1089, k1087, k1088]	13.53
k1192	O + C3H5	CO + C2H5	-409.21	4.54e-23	cm^3 molecules^-1 s^-1	Group 149	[k474, k1192, k1193, k1141, k1186, k1188, k1191, k1189, k1187, k1142, k1190, k1089, k1087, k1088]	11.68
k1193	O + C3H5	CH2CH2 + HCO	-324.52	1.79e-23	cm^3 molecules^-1 s^-1	Group 149	[k474, k1192, k1193, k1141, k1186, k1188, k1191, k1189, k1187, k1142, k1190, k1089, k1087, k1088]	4.61
k1194	O + H2CCO	O + HCCOH	140.65	2.06e-25	cm^3 molecules^-1 s^-1	Group 182	[k1032, k1198, k1197, k1196, k1194]	0.17
k1195	O + HCCOH	O + H2CCO	-140.65	1.09e-23	cm^3 molecules^-1 s^-1	Group 188	[k1033, k1201, k1200, k1195, k1199]	8.14
k1196	O + H2CCO	OH + C2OH	12.86	7.82e-24	cm^3 molecules^-1 s^-1	Group 182	[k1032, k1198, k1197, k1196, k1194]	6.29
k1197	O + H2CCO	H2O + C2O	-63.25	2.43e-23	cm^3 molecules^-1 s^-1	Group 182	[k1032, k1198, k1197, k1196, k1194]	19.55
k1198	O + H2CCO	HCO + HCO	-118.72	4.54e-23	cm^3 molecules^-1 s^-1	Group 182	[k1032, k1198, k1197, k1196, k1194]	36.52
k1199	O + HCCOH	OH + C2OH	-127.79	4.48e-26	cm^3 molecules^-1 s^-1	Group 188	[k1033, k1201, k1200, k1195, k1199]	0.03
k1200	O + HCCOH	H2O + C2O	-203.9	2.86e-23	cm^3 molecules^-1 s^-1	Group 188	[k1033, k1201, k1200, k1195, k1199]	21.35
k1201	O + HCCOH	HCO + HCO	-259.37	4.46e-23	cm^3 molecules^-1 s^-1	Group 188	[k1033, k1201, k1200, k1195, k1199]	33.30
k1202	O + CH2CHOH	O + CH2OCH2	73.41	8.69e-24	cm^3 molecules^-1 s^-1	Group 154	[k1206, k476, k478, k480, k1209, k482, k1143, k1110, k1210, k1204, k1207, k1202, k1208, k1077]	2.27
k1203	O + CH2OCH2	O + CH2CHOH	-73.41	1.26e-23	cm^3 molecules^-1 s^-1	Group 155	[k1213, k484, k486, k488, k1216, k490, k1144, k1111, k1217, k1211, k1214, k1203, k1215, k1078, k1109]	3.45
k1204	O + CH2CHOH	O + CH3CHO	-41.65	4.48e-23	cm^3 molecules^-1 s^-1	Group 154	[k1206, k476, k478, k480, k1209, k482, k1143, k1110, k1210, k1204, k1207, k1202, k1208, k1077]	11.70
k1205	O + CH3CHO	O + CH2CHOH	41.65	9.18e-25	cm^3 molecules^-1 s^-1	Group 164	[k1218, k492, k494, k496, k1220, k498, k1145, k1112, k1221, k1219, k1205, k1212]	0.30
k1206	O + CH2CHOH	CH4 + CO2	-593.12	2.96e-23	cm^3 molecules^-1 s^-1	Group 154	[k1206, k476, k478, k480, k1209, k482, k1143, k1110, k1210, k1204, k1207, k1202, k1208, k1077]	7.73
k1207	O + CH2CHOH	CHCH + H2O2	-33.99	4.13e-24	cm^3 molecules^-1 s^-1	Group 154	[k1206, k476, k478, k480, k1209, k482, k1143, k1110, k1210, k1204, k1207, k1202, k1208, k1077]	1.08
k1208	O + CH2CHOH	C2H3 + HO2	182.94	1.29e-23	cm^3 molecules^-1 s^-1	Group 154	[k1206, k476, k478, k480, k1209, k482, k1143, k1110, k1210, k1204, k1207, k1202, k1208, k1077]	3.37
k1209	O + CH2CHOH	CO + CH3OH	-437.3	4.68e-23	cm^3 molecules^-1 s^-1	Group 154	[k1206, k476, k478, k480, k1209, k482, k1143, k1110, k1210, k1204, k1207, k1202, k1208, k1077]	12.22
k1210	O + CH2CHOH	CH2CH2 + O2	-72.57	5.24e-23	cm^3 molecules^-1 s^-1	Group 154	[k1206, k476, k478, k480, k1209, k482, k1143, k1110, k1210, k1204, k1207, k1202, k1208, k1077]	13.68
k1211	O + CH2OCH2	O + CH3CHO	-115.06	3.99e-23	cm^3 molecules^-1 s^-1	Group 155	[k1213, k484, k486, k488, k1216, k490, k1144, k1111, k1217, k1211, k1214, k1203, k1215, k1078, k1109]	10.93
k1212	O + CH3CHO	O + CH2OCH2	115.06	7.17e-26	cm^3 molecules^-1 s^-1	Group 164	[k1218, k492, k494, k496, k1220, k498, k1145, k1112, k1221, k1219, k1205, k1212]	0.02
k1213	O + CH2OCH2	CH4 + CO2	-666.53	2.30e-23	cm^3 molecules^-1 s^-1	Group 155	[k1213, k484, k486, k488, k1216, k490, k1144, k1111, k1217, k1211, k1214, k1203, k1215, k1078, k1109]	6.30
k1214	O + CH2OCH2	CHCH + H2O2	-107.4	3.48e-23	cm^3 molecules^-1 s^-1	Group 155	[k1213, k484, k486, k488, k1216, k490, k1144, k1111, k1217, k1211, k1214, k1203, k1215, k1078, k1109]	9.53
k1215	O + CH2OCH2	C2H3 + HO2	109.53	3.78e-24	cm^3 molecules^-1 s^-1	Group 155	[k1213, k484, k486, k488, k1216, k490, k1144, k1111, k1217, k1211, k1214, k1203, k1215, k1078, k1109]	1.04
k1216	O + CH2OCH2	CO + CH3OH	-510.71	1.85e-23	cm^3 molecules^-1 s^-1	Group 155	[k1213, k484, k486, k488, k1216, k490, k1144, k1111, k1217, k1211, k1214, k1203, k1215, k1078, k1109]	5.07
k1217	O + CH2OCH2	CH2CH2 + O2	-145.98	4.81e-23	cm^3 molecules^-1 s^-1	Group 155	[k1213, k484, k486, k488, k1216, k490, k1144, k1111, k1217, k1211, k1214, k1203, k1215, k1078, k1109]	13.17
k1218	O + CH3CHO	CH4 + CO2	-551.47	3.89e-23	cm^3 molecules^-1 s^-1	Group 164	[k1218, k492, k494, k496, k1220, k498, k1145, k1112, k1221, k1219, k1205, k1212]	12.84
k1219	O + CH3CHO	CHCH + H2O2	7.66	2.30e-23	cm^3 molecules^-1 s^-1	Group 164	[k1218, k492, k494, k496, k1220, k498, k1145, k1112, k1221, k1219, k1205, k1212]	7.59
k1220	O + CH3CHO	CO + CH3OH	-395.65	5.27e-23	cm^3 molecules^-1 s^-1	Group 164	[k1218, k492, k494, k496, k1220, k498, k1145, k1112, k1221, k1219, k1205, k1212]	17.40
k1221	O + CH3CHO	CH2CH2 + O2	-30.92	1.11e-23	cm^3 molecules^-1 s^-1	Group 164	[k1218, k492, k494, k496, k1220, k498, k1145, k1112, k1221, k1219, k1205, k1212]	3.66
k1222	O + HOCO	OH + CO2	-421.49	1.22e-23	cm^3 molecules^-1 s^-1	Group 194	[k504, k1222, k1223, k1224, k852]	19.64
k1223	O + HOCO	CO + HO2	-164.32	7.80e-24	cm^3 molecules^-1 s^-1	Group 194	[k504, k1222, k1223, k1224, k852]	12.56
k1224	O + HOCO	HCO + O2	-24.28	1.09e-25	cm^3 molecules^-1 s^-1	Group 194	[k504, k1222, k1223, k1224, k852]	0.18
k1225	O + HOCHCH3	CH4 + HOCO	-451.71	2.62e-23	cm^3 molecules^-1 s^-1	Group 193	[k1225, k1034, k1147, k864, k1231, k506, k878, k1228, k1233, k890, k1234, k1226, k901, k1227, k1230, k1232, k1146, k1229, k1090, k1148]	6.54
k1226	O + HOCHCH3	OH + CH2CHOH	-280.08	2.74e-23	cm^3 molecules^-1 s^-1	Group 193	[k1225, k1034, k1147, k864, k1231, k506, k878, k1228, k1233, k890, k1234, k1226, k901, k1227, k1230, k1232, k1146, k1229, k1090, k1148]	6.84
k1227	O + HOCHCH3	OH + CH2OCH2	-206.67	3.22e-23	cm^3 molecules^-1 s^-1	Group 193	[k1225, k1034, k1147, k864, k1231, k506, k878, k1228, k1233, k890, k1234, k1226, k901, k1227, k1230, k1232, k1146, k1229, k1090, k1148]	8.04
k1228	O + HOCHCH3	OH + CH3CHO	-321.73	6.03e-24	cm^3 molecules^-1 s^-1	Group 193	[k1225, k1034, k1147, k864, k1231, k506, k878, k1228, k1233, k890, k1234, k1226, k901, k1227, k1230, k1232, k1146, k1229, k1090, k1148]	1.51
k1229	O + HOCHCH3	C2H3 + H2O2	-32.13	2.03e-23	cm^3 molecules^-1 s^-1	Group 193	[k1225, k1034, k1147, k864, k1231, k506, k878, k1228, k1233, k890, k1234, k1226, k901, k1227, k1230, k1232, k1146, k1229, k1090, k1148]	5.07
k1230	O + HOCHCH3	CH2CH2 + HO2	-127.95	3.31e-23	cm^3 molecules^-1 s^-1	Group 193	[k1225, k1034, k1147, k864, k1231, k506, k878, k1228, k1233, k890, k1234, k1226, k901, k1227, k1230, k1232, k1146, k1229, k1090, k1148]	8.26
k1231	O + HOCHCH3	HCO + CH3OH	-352.64	7.81e-24	cm^3 molecules^-1 s^-1	Group 193	[k1225, k1034, k1147, k864, k1231, k506, k878, k1228, k1233, k890, k1234, k1226, k901, k1227, k1230, k1232, k1146, k1229, k1090, k1148]	1.95
k1232	O + HOCHCH3	C2H5 + O2	-72.6	2.33e-23	cm^3 molecules^-1 s^-1	Group 193	[k1225, k1034, k1147, k864, k1231, k506, k878, k1228, k1233, k890, k1234, k1226, k901, k1227, k1230, k1232, k1146, k1229, k1090, k1148]	5.82
k1233	O + HOCHCH3	H2CO + CH2OH	-319.73	1.30e-24	cm^3 molecules^-1 s^-1	Group 193	[k1225, k1034, k1147, k864, k1231, k506, k878, k1228, k1233, k890, k1234, k1226, k901, k1227, k1230, k1232, k1146, k1229, k1090, k1148]	0.32
k1234	O + HOCHCH3	H2CO + CH3O	-280.44	2.81e-23	cm^3 molecules^-1 s^-1	Group 193	[k1225, k1034, k1147, k864, k1231, k506, k878, k1228, k1233, k890, k1234, k1226, k901, k1227, k1230, k1232, k1146, k1229, k1090, k1148]	7.02
k1235	O + CH2OO	O + HCOOH	-380.46	5.24e-23	cm^3 molecules^-1 s^-1	Group 158	[k1238, k1235, k1236]	63.27
k1236	O + CH2OO	O + H2CO2	102.54	1.20e-25	cm^3 molecules^-1 s^-1	Group 158	[k1238, k1235, k1236]	0.14
k1237	O + H2CO2	O + CH2OO	-102.54	5.70e-26	cm^3 molecules^-1 s^-1	Group 184	[k1241, k1239, k1237]	0.24
k1238	O + CH2OO	OH + HOCO	-400.15	3.03e-23	cm^3 molecules^-1 s^-1	Group 158	[k1238, k1235, k1236]	36.59
k1239	O + H2CO2	O + HCOOH	-483.0	6.57e-25	cm^3 molecules^-1 s^-1	Group 184	[k1241, k1239, k1237]	2.82
k1240	O + HCOOH	OH + HOCO	-19.69	3.25e-23	cm^3 molecules^-1 s^-1	Single (order=2)	-	100.00
k1241	O + H2CO2	OH + HOCO	-502.69	2.26e-23	cm^3 molecules^-1 s^-1	Group 184	[k1241, k1239, k1237]	96.94
k1242	O + CH3CH2OH	O + CH3OCH3	50.81	1.09e-23	cm^3 molecules^-1 s^-1	Group 162	[k1245, k1035, k1250, k514, k508, k1248, k1037, k1039, k510, k1253, k1249, k1041, k512, k1251, k1254, k1244, k1255, k1247, k1113, k1256, k1246, k1257, k924, k1242, k1252]	1.63
k1243	O + CH3OCH3	O + CH3CH2OH	-50.81	3.14e-23	cm^3 molecules^-1 s^-1	Group 173	[k1259, k1036, k1264, k522, k516, k1262, k1038, k1040, k518, k1267, k1263, k1042, k520, k1265, k1268, k1258, k1269, k1261, k1114, k1270, k1243, k1260, k1271, k926, k1266, k1115]	4.00
k1244	O + CH3CH2OH	CH4 + CH2OO	-86.66	2.14e-23	cm^3 molecules^-1 s^-1	Group 162	[k1245, k1035, k1250, k514, k508, k1248, k1037, k1039, k510, k1253, k1249, k1041, k512, k1251, k1254, k1244, k1255, k1247, k1113, k1256, k1246, k1257, k924, k1242, k1252]	3.19
k1245	O + CH3CH2OH	CH4 + HCOOH	-467.12	2.65e-23	cm^3 molecules^-1 s^-1	Group 162	[k1245, k1035, k1250, k514, k508, k1248, k1037, k1039, k510, k1253, k1249, k1041, k512, k1251, k1254, k1244, k1255, k1247, k1113, k1256, k1246, k1257, k924, k1242, k1252]	3.96
k1246	O + CH3CH2OH	CH4 + H2CO2	15.88	7.25e-25	cm^3 molecules^-1 s^-1	Group 162	[k1245, k1035, k1250, k514, k508, k1248, k1037, k1039, k510, k1253, k1249, k1041, k512, k1251, k1254, k1244, k1255, k1247, k1113, k1256, k1246, k1257, k924, k1242, k1252]	0.11
k1247	O + CH3CH2OH	OH + HOCHCH3	-35.1	3.34e-23	cm^3 molecules^-1 s^-1	Group 162	[k1245, k1035, k1250, k514, k508, k1248, k1037, k1039, k510, k1253, k1249, k1041, k512, k1251, k1254, k1244, k1255, k1247, k1113, k1256, k1246, k1257, k924, k1242, k1252]	4.99
k1248	O + CH3CH2OH	H2O + CH2CHOH	-381.79	2.72e-23	cm^3 molecules^-1 s^-1	Group 162	[k1245, k1035, k1250, k514, k508, k1248, k1037, k1039, k510, k1253, k1249, k1041, k512, k1251, k1254, k1244, k1255, k1247, k1113, k1256, k1246, k1257, k924, k1242, k1252]	4.06
k1249	O + CH3CH2OH	H2O + CH2OCH2	-308.38	5.12e-23	cm^3 molecules^-1 s^-1	Group 162	[k1245, k1035, k1250, k514, k508, k1248, k1037, k1039, k510, k1253, k1249, k1041, k512, k1251, k1254, k1244, k1255, k1247, k1113, k1256, k1246, k1257, k924, k1242, k1252]	7.64
k1250	O + CH3CH2OH	H2O + CH3CHO	-423.44	2.66e-23	cm^3 molecules^-1 s^-1	Group 162	[k1245, k1035, k1250, k514, k508, k1248, k1037, k1039, k510, k1253, k1249, k1041, k512, k1251, k1254, k1244, k1255, k1247, k1113, k1256, k1246, k1257, k924, k1242, k1252]	3.97
k1251	O + CH3CH2OH	CH2CH2 + H2O2	-98.04	1.97e-23	cm^3 molecules^-1 s^-1	Group 162	[k1245, k1035, k1250, k514, k508, k1248, k1037, k1039, k510, k1253, k1249, k1041, k512, k1251, k1254, k1244, k1255, k1247, k1113, k1256, k1246, k1257, k924, k1242, k1252]	2.94
k1252	O + CH3CH2OH	C2H5 + HO2	117.0	2.43e-23	cm^3 molecules^-1 s^-1	Group 162	[k1245, k1035, k1250, k514, k508, k1248, k1037, k1039, k510, k1253, k1249, k1041, k512, k1251, k1254, k1244, k1255, k1247, k1113, k1256, k1246, k1257, k924, k1242, k1252]	3.63
k1253	O + CH3CH2OH	H2CO + CH3OH	-324.94	5.29e-23	cm^3 molecules^-1 s^-1	Group 162	[k1245, k1035, k1250, k514, k508, k1248, k1037, k1039, k510, k1253, k1249, k1041, k512, k1251, k1254, k1244, k1255, k1247, k1113, k1256, k1246, k1257, k924, k1242, k1252]	7.90
k1254	O + CH3CH2OH	CH3CH3 + O2	-97.91	5.24e-23	cm^3 molecules^-1 s^-1	Group 162	[k1245, k1035, k1250, k514, k508, k1248, k1037, k1039, k510, k1253, k1249, k1041, k512, k1251, k1254, k1244, k1255, k1247, k1113, k1256, k1246, k1257, k924, k1242, k1252]	7.82
k1255	O + CH3CH2OH	CH2OH + CH2OH	-50.26	1.42e-23	cm^3 molecules^-1 s^-1	Group 162	[k1245, k1035, k1250, k514, k508, k1248, k1037, k1039, k510, k1253, k1249, k1041, k512, k1251, k1254, k1244, k1255, k1247, k1113, k1256, k1246, k1257, k924, k1242, k1252]	2.12
k1256	O + CH3CH2OH	CH2OH + CH3O	-10.97	1.40e-23	cm^3 molecules^-1 s^-1	Group 162	[k1245, k1035, k1250, k514, k508, k1248, k1037, k1039, k510, k1253, k1249, k1041, k512, k1251, k1254, k1244, k1255, k1247, k1113, k1256, k1246, k1257, k924, k1242, k1252]	2.09
k1257	O + CH3CH2OH	CH3O + CH3O	28.32	7.75e-24	cm^3 molecules^-1 s^-1	Group 162	[k1245, k1035, k1250, k514, k508, k1248, k1037, k1039, k510, k1253, k1249, k1041, k512, k1251, k1254, k1244, k1255, k1247, k1113, k1256, k1246, k1257, k924, k1242, k1252]	1.16
k1258	O + CH3OCH3	CH4 + CH2OO	-137.47	1.73e-23	cm^3 molecules^-1 s^-1	Group 173	[k1259, k1036, k1264, k522, k516, k1262, k1038, k1040, k518, k1267, k1263, k1042, k520, k1265, k1268, k1258, k1269, k1261, k1114, k1270, k1243, k1260, k1271, k926, k1266, k1115]	2.20
k1259	O + CH3OCH3	CH4 + HCOOH	-517.93	4.20e-23	cm^3 molecules^-1 s^-1	Group 173	[k1259, k1036, k1264, k522, k516, k1262, k1038, k1040, k518, k1267, k1263, k1042, k520, k1265, k1268, k1258, k1269, k1261, k1114, k1270, k1243, k1260, k1271, k926, k1266, k1115]	5.35
k1260	O + CH3OCH3	CH4 + H2CO2	-34.93	1.97e-23	cm^3 molecules^-1 s^-1	Group 173	[k1259, k1036, k1264, k522, k516, k1262, k1038, k1040, k518, k1267, k1263, k1042, k520, k1265, k1268, k1258, k1269, k1261, k1114, k1270, k1243, k1260, k1271, k926, k1266, k1115]	2.51
k1261	O + CH3OCH3	OH + HOCHCH3	-85.91	1.46e-23	cm^3 molecules^-1 s^-1	Group 173	[k1259, k1036, k1264, k522, k516, k1262, k1038, k1040, k518, k1267, k1263, k1042, k520, k1265, k1268, k1258, k1269, k1261, k1114, k1270, k1243, k1260, k1271, k926, k1266, k1115]	1.86
k1262	O + CH3OCH3	H2O + CH2CHOH	-432.6	5.02e-23	cm^3 molecules^-1 s^-1	Group 173	[k1259, k1036, k1264, k522, k516, k1262, k1038, k1040, k518, k1267, k1263, k1042, k520, k1265, k1268, k1258, k1269, k1261, k1114, k1270, k1243, k1260, k1271, k926, k1266, k1115]	6.39
k1263	O + CH3OCH3	H2O + CH2OCH2	-359.19	5.05e-23	cm^3 molecules^-1 s^-1	Group 173	[k1259, k1036, k1264, k522, k516, k1262, k1038, k1040, k518, k1267, k1263, k1042, k520, k1265, k1268, k1258, k1269, k1261, k1114, k1270, k1243, k1260, k1271, k926, k1266, k1115]	6.43
k1264	O + CH3OCH3	H2O + CH3CHO	-474.25	3.23e-23	cm^3 molecules^-1 s^-1	Group 173	[k1259, k1036, k1264, k522, k516, k1262, k1038, k1040, k518, k1267, k1263, k1042, k520, k1265, k1268, k1258, k1269, k1261, k1114, k1270, k1243, k1260, k1271, k926, k1266, k1115]	4.11
k1265	O + CH3OCH3	CH2CH2 + H2O2	-148.85	4.06e-23	cm^3 molecules^-1 s^-1	Group 173	[k1259, k1036, k1264, k522, k516, k1262, k1038, k1040, k518, k1267, k1263, k1042, k520, k1265, k1268, k1258, k1269, k1261, k1114, k1270, k1243, k1260, k1271, k926, k1266, k1115]	5.17
k1266	O + CH3OCH3	C2H5 + HO2	66.19	5.83e-25	cm^3 molecules^-1 s^-1	Group 173	[k1259, k1036, k1264, k522, k516, k1262, k1038, k1040, k518, k1267, k1263, k1042, k520, k1265, k1268, k1258, k1269, k1261, k1114, k1270, k1243, k1260, k1271, k926, k1266, k1115]	0.07
k1267	O + CH3OCH3	H2CO + CH3OH	-375.75	4.77e-23	cm^3 molecules^-1 s^-1	Group 173	[k1259, k1036, k1264, k522, k516, k1262, k1038, k1040, k518, k1267, k1263, k1042, k520, k1265, k1268, k1258, k1269, k1261, k1114, k1270, k1243, k1260, k1271, k926, k1266, k1115]	6.07
k1268	O + CH3OCH3	CH3CH3 + O2	-148.72	3.71e-23	cm^3 molecules^-1 s^-1	Group 173	[k1259, k1036, k1264, k522, k516, k1262, k1038, k1040, k518, k1267, k1263, k1042, k520, k1265, k1268, k1258, k1269, k1261, k1114, k1270, k1243, k1260, k1271, k926, k1266, k1115]	4.72
k1269	O + CH3OCH3	CH2OH + CH2OH	-101.07	3.26e-23	cm^3 molecules^-1 s^-1	Group 173	[k1259, k1036, k1264, k522, k516, k1262, k1038, k1040, k518, k1267, k1263, k1042, k520, k1265, k1268, k1258, k1269, k1261, k1114, k1270, k1243, k1260, k1271, k926, k1266, k1115]	4.15
k1270	O + CH3OCH3	CH2OH + CH3O	-61.78	3.21e-23	cm^3 molecules^-1 s^-1	Group 173	[k1259, k1036, k1264, k522, k516, k1262, k1038, k1040, k518, k1267, k1263, k1042, k520, k1265, k1268, k1258, k1269, k1261, k1114, k1270, k1243, k1260, k1271, k926, k1266, k1115]	4.09
k1271	O + CH3OCH3	CH3O + CH3O	-22.49	3.28e-23	cm^3 molecules^-1 s^-1	Group 173	[k1259, k1036, k1264, k522, k516, k1262, k1038, k1040, k518, k1267, k1263, k1042, k520, k1265, k1268, k1258, k1269, k1261, k1114, k1270, k1243, k1260, k1271, k926, k1266, k1115]	4.18
k1272	O + CH3OOH	O + CH2OHOH	-264.29	1.09e-25	cm^3 molecules^-1 s^-1	Group 177	[k1279, k1044, k1281, k1278, k1282, k1272, k1280]	0.14
k1273	O + CH2OHOH	H2O + CH2OO	-97.16	6.58e-26	cm^3 molecules^-1 s^-1	Group 157	[k1274, k1043, k1276, k1273, k1277, k1275]	0.08
k1274	O + CH2OHOH	H2O + HCOOH	-477.62	1.36e-23	cm^3 molecules^-1 s^-1	Group 157	[k1274, k1043, k1276, k1273, k1277, k1275]	16.57
k1275	O + CH2OHOH	H2O + H2CO2	5.38	5.26e-26	cm^3 molecules^-1 s^-1	Group 157	[k1274, k1043, k1276, k1273, k1277, k1275]	0.06
k1276	O + CH2OHOH	H2CO + H2O2	-102.47	1.89e-23	cm^3 molecules^-1 s^-1	Group 157	[k1274, k1043, k1276, k1273, k1277, k1275]	23.03
k1277	O + CH2OHOH	O2 + CH3OH	-57.72	8.45e-25	cm^3 molecules^-1 s^-1	Group 157	[k1274, k1043, k1276, k1273, k1277, k1275]	1.03
k1278	O + CH3OOH	H2O + CH2OO	-361.45	1.43e-24	cm^3 molecules^-1 s^-1	Group 177	[k1279, k1044, k1281, k1278, k1282, k1272, k1280]	1.89
k1279	O + CH3OOH	H2O + HCOOH	-741.91	5.03e-23	cm^3 molecules^-1 s^-1	Group 177	[k1279, k1044, k1281, k1278, k1282, k1272, k1280]	66.52
k1280	O + CH3OOH	H2O + H2CO2	-258.91	2.83e-25	cm^3 molecules^-1 s^-1	Group 177	[k1279, k1044, k1281, k1278, k1282, k1272, k1280]	0.37
k1281	O + CH3OOH	H2CO + H2O2	-366.76	9.39e-25	cm^3 molecules^-1 s^-1	Group 177	[k1279, k1044, k1281, k1278, k1282, k1272, k1280]	1.24
k1282	O + CH3OOH	O2 + CH3OH	-322.01	2.54e-25	cm^3 molecules^-1 s^-1	Group 177	[k1279, k1044, k1281, k1278, k1282, k1272, k1280]	0.34
k1283	O + C3OH	OH + C3O	-169.46	7.29e-24	cm^3 molecules^-1 s^-1	Group 152	[k1285, k985, k1283, k1286, k1091, k1284]	7.60
k1284	O + C3OH	C2 + HOCO	101.68	1.57e-24	cm^3 molecules^-1 s^-1	Group 152	[k1285, k985, k1283, k1286, k1091, k1284]	1.64
k1285	O + C3OH	CO + C2OH	-473.88	3.30e-23	cm^3 molecules^-1 s^-1	Group 152	[k1285, k985, k1283, k1286, k1091, k1284]	34.40
k1286	O + C3OH	HCO + C2O	-118.64	8.82e-24	cm^3 molecules^-1 s^-1	Group 152	[k1285, k985, k1283, k1286, k1091, k1284]	9.20
k1287	O + CH3COCH2	C2H3 + CH2OO	82.32	4.75e-23	cm^3 molecules^-1 s^-1	Group 167	[k1295, k1290, k1291, k1294, k1292, k1288, k1296, k1298, k1301, k1293, k1297, k1299, k1116, k1092, k1300, k1302, k1303, k1093, k1094, k1287, k1095, k1289]	6.83
k1288	O + CH3COCH2	C2H3 + HCOOH	-298.14	2.80e-23	cm^3 molecules^-1 s^-1	Group 167	[k1295, k1290, k1291, k1294, k1292, k1288, k1296, k1298, k1301, k1293, k1297, k1299, k1116, k1092, k1300, k1302, k1303, k1093, k1094, k1287, k1095, k1289]	4.02
k1289	O + CH3COCH2	C2H3 + H2CO2	184.86	1.37e-25	cm^3 molecules^-1 s^-1	Group 167	[k1295, k1290, k1291, k1294, k1292, k1288, k1296, k1298, k1301, k1293, k1297, k1299, k1116, k1092, k1300, k1302, k1303, k1093, k1094, k1287, k1095, k1289]	0.02
k1290	O + CH3COCH2	CO + HOCHCH3	-385.01	4.28e-23	cm^3 molecules^-1 s^-1	Group 167	[k1295, k1290, k1291, k1294, k1292, k1288, k1296, k1298, k1301, k1293, k1297, k1299, k1116, k1092, k1300, k1302, k1303, k1093, k1094, k1287, k1095, k1289]	6.15
k1291	O + CH3COCH2	CH2CH2 + HOCO	-348.64	1.90e-23	cm^3 molecules^-1 s^-1	Group 167	[k1295, k1290, k1291, k1294, k1292, k1288, k1296, k1298, k1301, k1293, k1297, k1299, k1116, k1092, k1300, k1302, k1303, k1093, k1094, k1287, k1095, k1289]	2.73
k1292	O + CH3COCH2	HCO + CH2CHOH	-300.35	5.10e-23	cm^3 molecules^-1 s^-1	Group 167	[k1295, k1290, k1291, k1294, k1292, k1288, k1296, k1298, k1301, k1293, k1297, k1299, k1116, k1092, k1300, k1302, k1303, k1093, k1094, k1287, k1095, k1289]	7.33
k1293	O + CH3COCH2	HCO + CH2OCH2	-226.94	3.30e-23	cm^3 molecules^-1 s^-1	Group 167	[k1295, k1290, k1291, k1294, k1292, k1288, k1296, k1298, k1301, k1293, k1297, k1299, k1116, k1092, k1300, k1302, k1303, k1093, k1094, k1287, k1095, k1289]	4.74
k1294	O + CH3COCH2	HCO + CH3CHO	-342.0	3.15e-23	cm^3 molecules^-1 s^-1	Group 167	[k1295, k1290, k1291, k1294, k1292, k1288, k1296, k1298, k1301, k1293, k1297, k1299, k1116, k1092, k1300, k1302, k1303, k1093, k1094, k1287, k1095, k1289]	4.53
k1295	O + CH3COCH2	C2H5 + CO2	-490.08	3.73e-23	cm^3 molecules^-1 s^-1	Group 167	[k1295, k1290, k1291, k1294, k1292, k1288, k1296, k1298, k1301, k1293, k1297, k1299, k1116, k1092, k1300, k1302, k1303, k1093, k1094, k1287, k1095, k1289]	5.36
k1296	O + CH3COCH2	CH2OH + H2CCO	-284.08	3.41e-23	cm^3 molecules^-1 s^-1	Group 167	[k1295, k1290, k1291, k1294, k1292, k1288, k1296, k1298, k1301, k1293, k1297, k1299, k1116, k1092, k1300, k1302, k1303, k1093, k1094, k1287, k1095, k1289]	4.90
k1297	O + CH3COCH2	CH2OH + HCCOH	-143.43	4.61e-23	cm^3 molecules^-1 s^-1	Group 167	[k1295, k1290, k1291, k1294, k1292, k1288, k1296, k1298, k1301, k1293, k1297, k1299, k1116, k1092, k1300, k1302, k1303, k1093, k1094, k1287, k1095, k1289]	6.63
k1298	O + CH3COCH2	CH3O + H2CCO	-244.79	3.96e-23	cm^3 molecules^-1 s^-1	Group 167	[k1295, k1290, k1291, k1294, k1292, k1288, k1296, k1298, k1301, k1293, k1297, k1299, k1116, k1092, k1300, k1302, k1303, k1093, k1094, k1287, k1095, k1289]	5.69
k1299	O + CH3COCH2	CH3O + HCCOH	-104.14	4.18e-23	cm^3 molecules^-1 s^-1	Group 167	[k1295, k1290, k1291, k1294, k1292, k1288, k1296, k1298, k1301, k1293, k1297, k1299, k1116, k1092, k1300, k1302, k1303, k1093, k1094, k1287, k1095, k1289]	6.01
k1300	O + CH3COCH2	O2 + C3H5	-48.4	1.90e-23	cm^3 molecules^-1 s^-1	Group 167	[k1295, k1290, k1291, k1294, k1292, k1288, k1296, k1298, k1301, k1293, k1297, k1299, k1116, k1092, k1300, k1302, k1303, k1093, k1094, k1287, k1095, k1289]	2.73
k1301	O + CH3COCH2	CH3OH + C2OH	-241.33	1.72e-23	cm^3 molecules^-1 s^-1	Group 167	[k1295, k1290, k1291, k1294, k1292, k1288, k1296, k1298, k1301, k1293, k1297, k1299, k1116, k1092, k1300, k1302, k1303, k1093, k1094, k1287, k1095, k1289]	2.47
k1302	O + CH3COCH2	HO2 + C3H4	-20.54	2.39e-23	cm^3 molecules^-1 s^-1	Group 167	[k1295, k1290, k1291, k1294, k1292, k1288, k1296, k1298, k1301, k1293, k1297, k1299, k1116, k1092, k1300, k1302, k1303, k1093, k1094, k1287, k1095, k1289]	3.43
k1303	O + CH3COCH2	H2O2 + C3H3	-3.71	4.32e-23	cm^3 molecules^-1 s^-1	Group 167	[k1295, k1290, k1291, k1294, k1292, k1288, k1296, k1298, k1301, k1293, k1297, k1299, k1116, k1092, k1300, k1302, k1303, k1093, k1094, k1287, k1095, k1289]	6.21
k1304	O + CH3COCH3	OH + CH3COCH2	-28.06	3.27e-23	cm^3 molecules^-1 s^-1	Group 168	[k1317, k1307, k1310, k1308, k1316, k1318, k1314, k1305, k1315, k1319, k1149, k1313, k1117, k1312, k1304, k1118, k1321, k1309, k1119, k1306, k1120, k1311, k1320]	5.08
k1305	O + CH3COCH3	CHCH + CH2OHOH	-197.13	6.77e-24	cm^3 molecules^-1 s^-1	Group 168	[k1317, k1307, k1310, k1308, k1316, k1318, k1314, k1305, k1315, k1319, k1149, k1313, k1117, k1312, k1304, k1118, k1321, k1309, k1119, k1306, k1120, k1311, k1320]	1.05
k1306	O + CH3COCH3	CHCH + CH3OOH	67.16	1.29e-23	cm^3 molecules^-1 s^-1	Group 168	[k1317, k1307, k1310, k1308, k1316, k1318, k1314, k1305, k1315, k1319, k1149, k1313, k1117, k1312, k1304, k1118, k1321, k1309, k1119, k1306, k1120, k1311, k1320]	2.00
k1307	O + CH3COCH3	CO + CH3CH2OH	-377.97	3.06e-23	cm^3 molecules^-1 s^-1	Group 168	[k1317, k1307, k1310, k1308, k1316, k1318, k1314, k1305, k1315, k1319, k1149, k1313, k1117, k1312, k1304, k1118, k1321, k1309, k1119, k1306, k1120, k1311, k1320]	4.75
k1308	O + CH3COCH3	CO + CH3OCH3	-327.16	4.65e-23	cm^3 molecules^-1 s^-1	Group 168	[k1317, k1307, k1310, k1308, k1316, k1318, k1314, k1305, k1315, k1319, k1149, k1313, k1117, k1312, k1304, k1118, k1321, k1309, k1119, k1306, k1120, k1311, k1320]	7.22
k1309	O + CH3COCH3	CH2CH2 + CH2OO	23.45	1.59e-23	cm^3 molecules^-1 s^-1	Group 168	[k1317, k1307, k1310, k1308, k1316, k1318, k1314, k1305, k1315, k1319, k1149, k1313, k1117, k1312, k1304, k1118, k1321, k1309, k1119, k1306, k1120, k1311, k1320]	2.47
k1310	O + CH3COCH3	CH2CH2 + HCOOH	-357.01	4.18e-23	cm^3 molecules^-1 s^-1	Group 168	[k1317, k1307, k1310, k1308, k1316, k1318, k1314, k1305, k1315, k1319, k1149, k1313, k1117, k1312, k1304, k1118, k1321, k1309, k1119, k1306, k1120, k1311, k1320]	6.49
k1311	O + CH3COCH3	CH2CH2 + H2CO2	125.99	6.18e-24	cm^3 molecules^-1 s^-1	Group 168	[k1317, k1307, k1310, k1308, k1316, k1318, k1314, k1305, k1315, k1319, k1149, k1313, k1117, k1312, k1304, k1118, k1321, k1309, k1119, k1306, k1120, k1311, k1320]	0.96
k1312	O + CH3COCH3	HCO + HOCHCH3	-48.33	3.28e-23	cm^3 molecules^-1 s^-1	Group 168	[k1317, k1307, k1310, k1308, k1316, k1318, k1314, k1305, k1315, k1319, k1149, k1313, k1117, k1312, k1304, k1118, k1321, k1309, k1119, k1306, k1120, k1311, k1320]	5.09
k1313	O + CH3COCH3	C2H5 + HOCO	-96.65	4.43e-23	cm^3 molecules^-1 s^-1	Group 168	[k1317, k1307, k1310, k1308, k1316, k1318, k1314, k1305, k1315, k1319, k1149, k1313, k1117, k1312, k1304, k1118, k1321, k1309, k1119, k1306, k1120, k1311, k1320]	6.88
k1314	O + CH3COCH3	H2CO + CH2CHOH	-265.61	5.13e-23	cm^3 molecules^-1 s^-1	Group 168	[k1317, k1307, k1310, k1308, k1316, k1318, k1314, k1305, k1315, k1319, k1149, k1313, k1117, k1312, k1304, k1118, k1321, k1309, k1119, k1306, k1120, k1311, k1320]	7.97
k1315	O + CH3COCH3	H2CO + CH2OCH2	-192.2	7.95e-24	cm^3 molecules^-1 s^-1	Group 168	[k1317, k1307, k1310, k1308, k1316, k1318, k1314, k1305, k1315, k1319, k1149, k1313, k1117, k1312, k1304, k1118, k1321, k1309, k1119, k1306, k1120, k1311, k1320]	1.23
k1316	O + CH3COCH3	H2CO + CH3CHO	-307.26	2.74e-23	cm^3 molecules^-1 s^-1	Group 168	[k1317, k1307, k1310, k1308, k1316, k1318, k1314, k1305, k1315, k1319, k1149, k1313, k1117, k1312, k1304, k1118, k1321, k1309, k1119, k1306, k1120, k1311, k1320]	4.25
k1317	O + CH3COCH3	CH3CH3 + CO2	-508.35	3.38e-23	cm^3 molecules^-1 s^-1	Group 168	[k1317, k1307, k1310, k1308, k1316, k1318, k1314, k1305, k1315, k1319, k1149, k1313, k1117, k1312, k1304, k1118, k1321, k1309, k1119, k1306, k1120, k1311, k1320]	5.25
k1318	O + CH3COCH3	CH3OH + H2CCO	-282.25	3.71e-23	cm^3 molecules^-1 s^-1	Group 168	[k1317, k1307, k1310, k1308, k1316, k1318, k1314, k1305, k1315, k1319, k1149, k1313, k1117, k1312, k1304, k1118, k1321, k1309, k1119, k1306, k1120, k1311, k1320]	5.76
k1319	O + CH3COCH3	CH3OH + HCCOH	-141.6	2.70e-23	cm^3 molecules^-1 s^-1	Group 168	[k1317, k1307, k1310, k1308, k1316, k1318, k1314, k1305, k1315, k1319, k1149, k1313, k1117, k1312, k1304, k1118, k1321, k1309, k1119, k1306, k1120, k1311, k1320]	4.19
k1320	O + CH3COCH3	HO2 + C3H5	148.24	1.67e-25	cm^3 molecules^-1 s^-1	Group 168	[k1317, k1307, k1310, k1308, k1316, k1318, k1314, k1305, k1315, k1319, k1149, k1313, k1117, k1312, k1304, k1118, k1321, k1309, k1119, k1306, k1120, k1311, k1320]	0.03
k1321	O + CH3COCH3	H2O2 + C3H4	16.41	3.00e-23	cm^3 molecules^-1 s^-1	Group 168	[k1317, k1307, k1310, k1308, k1316, k1318, k1314, k1305, k1315, k1319, k1149, k1313, k1117, k1312, k1304, k1118, k1321, k1309, k1119, k1306, k1120, k1311, k1320]	4.66
k1322	O + C2H3O2	HCO + CH2OO	30.65	2.97e-23	cm^3 molecules^-1 s^-1	Group 141	[k1326, k1327, k1323, k1121, k1325, k994, k1328, k1150, k1096, k1330, k1322, k1329, k1324]	7.86
k1323	O + C2H3O2	HCO + HCOOH	-349.81	2.89e-23	cm^3 molecules^-1 s^-1	Group 141	[k1326, k1327, k1323, k1121, k1325, k994, k1328, k1150, k1096, k1330, k1322, k1329, k1324]	7.65
k1324	O + C2H3O2	HCO + H2CO2	133.19	5.72e-25	cm^3 molecules^-1 s^-1	Group 141	[k1326, k1327, k1323, k1121, k1325, k994, k1328, k1150, k1096, k1330, k1322, k1329, k1324]	0.15
k1325	O + C2H3O2	H2CO + HOCO	-306.7	3.20e-23	cm^3 molecules^-1 s^-1	Group 141	[k1326, k1327, k1323, k1121, k1325, k994, k1328, k1150, k1096, k1330, k1322, k1329, k1324]	8.47
k1326	O + C2H3O2	CH2OH + CO2	-423.62	4.22e-23	cm^3 molecules^-1 s^-1	Group 141	[k1326, k1327, k1323, k1121, k1325, k994, k1328, k1150, k1096, k1330, k1322, k1329, k1324]	11.17
k1327	O + C2H3O2	CH3O + CO2	-384.33	5.24e-23	cm^3 molecules^-1 s^-1	Group 141	[k1326, k1327, k1323, k1121, k1325, k994, k1328, k1150, k1096, k1330, k1322, k1329, k1324]	13.87
k1328	O + C2H3O2	HO2 + H2CCO	-50.36	2.88e-23	cm^3 molecules^-1 s^-1	Group 141	[k1326, k1327, k1323, k1121, k1325, k994, k1328, k1150, k1096, k1330, k1322, k1329, k1324]	7.62
k1329	O + C2H3O2	HO2 + HCCOH	90.29	1.29e-23	cm^3 molecules^-1 s^-1	Group 141	[k1326, k1327, k1323, k1121, k1325, k994, k1328, k1150, k1096, k1330, k1322, k1329, k1324]	3.41
k1330	O + C2H3O2	H2O2 + C2OH	27.51	3.40e-23	cm^3 molecules^-1 s^-1	Group 141	[k1326, k1327, k1323, k1121, k1325, k994, k1328, k1150, k1096, k1330, k1322, k1329, k1324]	9.00
k1331	O + CH3COOH	O + HCOOCH3	71.59	2.25e-23	cm^3 molecules^-1 s^-1	Group 169	[k1339, k1045, k1337, k1344, k1343, k1341, k1331, k1338, k1333, k1342, k1345, k1335, k1340]	6.73
k1332	O + HCOOCH3	O + CH3COOH	-71.59	1.53e-23	cm^3 molecules^-1 s^-1	Group 190	[k1352, k1046, k1350, k1357, k1332, k1356, k1354, k1351, k1346, k1355, k1358, k1348, k1353]	3.97
k1333	O + CH3COOH	O + OHCH2CHO	114.06	2.48e-23	cm^3 molecules^-1 s^-1	Group 169	[k1339, k1045, k1337, k1344, k1343, k1341, k1331, k1338, k1333, k1342, k1345, k1335, k1340]	7.42
k1334	O + OHCH2CHO	O + CH3COOH	-114.06	3.65e-23	cm^3 molecules^-1 s^-1	Group 197	[k1363, k1047, k1361, k1368, k1334, k1367, k1365, k1347, k1362, k1366, k1369, k1359, k1364]	12.46
k1335	O + CH3COOH	O + OHCHCHOH	145.72	9.75e-24	cm^3 molecules^-1 s^-1	Group 169	[k1339, k1045, k1337, k1344, k1343, k1341, k1331, k1338, k1333, k1342, k1345, k1335, k1340]	2.92
k1336	O + OHCHCHOH	O + CH3COOH	-145.72	3.54e-23	cm^3 molecules^-1 s^-1	Group 198	[k1372, k1048, k1370, k1377, k1336, k1376, k1374, k1349, k1371, k1360, k1375, k1378, k1373]	9.03
k1337	O + CH3COOH	OH + C2H3O2	-17.73	2.78e-23	cm^3 molecules^-1 s^-1	Group 169	[k1339, k1045, k1337, k1344, k1343, k1341, k1331, k1338, k1333, k1342, k1345, k1335, k1340]	8.31
k1338	O + CH3COOH	H2CO + CH2OO	75.72	2.84e-23	cm^3 molecules^-1 s^-1	Group 169	[k1339, k1045, k1337, k1344, k1343, k1341, k1331, k1338, k1333, k1342, k1345, k1335, k1340]	8.49
k1339	O + CH3COOH	H2CO + HCOOH	-304.74	4.59e-23	cm^3 molecules^-1 s^-1	Group 169	[k1339, k1045, k1337, k1344, k1343, k1341, k1331, k1338, k1333, k1342, k1345, k1335, k1340]	13.73
k1340	O + CH3COOH	H2CO + H2CO2	178.26	7.17e-26	cm^3 molecules^-1 s^-1	Group 169	[k1339, k1045, k1337, k1344, k1343, k1341, k1331, k1338, k1333, k1342, k1345, k1335, k1340]	0.02
k1341	O + CH3COOH	O2 + CH2CHOH	58.31	4.56e-23	cm^3 molecules^-1 s^-1	Group 169	[k1339, k1045, k1337, k1344, k1343, k1341, k1331, k1338, k1333, k1342, k1345, k1335, k1340]	13.64
k1342	O + CH3COOH	O2 + CH2OCH2	131.72	1.59e-23	cm^3 molecules^-1 s^-1	Group 169	[k1339, k1045, k1337, k1344, k1343, k1341, k1331, k1338, k1333, k1342, k1345, k1335, k1340]	4.75
k1343	O + CH3COOH	O2 + CH3CHO	16.66	3.84e-23	cm^3 molecules^-1 s^-1	Group 169	[k1339, k1045, k1337, k1344, k1343, k1341, k1331, k1338, k1333, k1342, k1345, k1335, k1340]	11.48
k1344	O + CH3COOH	H2O2 + H2CCO	-3.08	2.20e-23	cm^3 molecules^-1 s^-1	Group 169	[k1339, k1045, k1337, k1344, k1343, k1341, k1331, k1338, k1333, k1342, k1345, k1335, k1340]	6.58
k1345	O + CH3COOH	H2O2 + HCCOH	137.57	2.53e-23	cm^3 molecules^-1 s^-1	Group 169	[k1339, k1045, k1337, k1344, k1343, k1341, k1331, k1338, k1333, k1342, k1345, k1335, k1340]	7.57
k1346	O + HCOOCH3	O + OHCH2CHO	42.47	4.33e-23	cm^3 molecules^-1 s^-1	Group 190	[k1352, k1046, k1350, k1357, k1332, k1356, k1354, k1351, k1346, k1355, k1358, k1348, k1353]	11.25
k1347	O + OHCH2CHO	O + HCOOCH3	-42.47	2.63e-23	cm^3 molecules^-1 s^-1	Group 197	[k1363, k1047, k1361, k1368, k1334, k1367, k1365, k1347, k1362, k1366, k1369, k1359, k1364]	8.98
k1348	O + HCOOCH3	O + OHCHCHOH	74.13	1.22e-23	cm^3 molecules^-1 s^-1	Group 190	[k1352, k1046, k1350, k1357, k1332, k1356, k1354, k1351, k1346, k1355, k1358, k1348, k1353]	3.17
k1349	O + OHCHCHOH	O + HCOOCH3	-74.13	2.83e-23	cm^3 molecules^-1 s^-1	Group 198	[k1372, k1048, k1370, k1377, k1336, k1376, k1374, k1349, k1371, k1360, k1375, k1378, k1373]	7.22
k1350	O + HCOOCH3	OH + C2H3O2	-89.32	9.15e-24	cm^3 molecules^-1 s^-1	Group 190	[k1352, k1046, k1350, k1357, k1332, k1356, k1354, k1351, k1346, k1355, k1358, k1348, k1353]	2.38
k1351	O + HCOOCH3	H2CO + CH2OO	4.13	5.09e-23	cm^3 molecules^-1 s^-1	Group 190	[k1352, k1046, k1350, k1357, k1332, k1356, k1354, k1351, k1346, k1355, k1358, k1348, k1353]	13.22
k1352	O + HCOOCH3	H2CO + HCOOH	-376.33	5.22e-23	cm^3 molecules^-1 s^-1	Group 190	[k1352, k1046, k1350, k1357, k1332, k1356, k1354, k1351, k1346, k1355, k1358, k1348, k1353]	13.56
k1353	O + HCOOCH3	H2CO + H2CO2	106.67	1.74e-25	cm^3 molecules^-1 s^-1	Group 190	[k1352, k1046, k1350, k1357, k1332, k1356, k1354, k1351, k1346, k1355, k1358, k1348, k1353]	0.05
k1354	O + HCOOCH3	O2 + CH2CHOH	-13.28	2.54e-23	cm^3 molecules^-1 s^-1	Group 190	[k1352, k1046, k1350, k1357, k1332, k1356, k1354, k1351, k1346, k1355, k1358, k1348, k1353]	6.60
k1355	O + HCOOCH3	O2 + CH2OCH2	60.13	4.69e-23	cm^3 molecules^-1 s^-1	Group 190	[k1352, k1046, k1350, k1357, k1332, k1356, k1354, k1351, k1346, k1355, k1358, k1348, k1353]	12.18
k1356	O + HCOOCH3	O2 + CH3CHO	-54.93	3.08e-23	cm^3 molecules^-1 s^-1	Group 190	[k1352, k1046, k1350, k1357, k1332, k1356, k1354, k1351, k1346, k1355, k1358, k1348, k1353]	8.00
k1357	O + HCOOCH3	H2O2 + H2CCO	-74.67	2.32e-23	cm^3 molecules^-1 s^-1	Group 190	[k1352, k1046, k1350, k1357, k1332, k1356, k1354, k1351, k1346, k1355, k1358, k1348, k1353]	6.03
k1358	O + HCOOCH3	H2O2 + HCCOH	65.98	4.14e-23	cm^3 molecules^-1 s^-1	Group 190	[k1352, k1046, k1350, k1357, k1332, k1356, k1354, k1351, k1346, k1355, k1358, k1348, k1353]	10.75
k1359	O + OHCH2CHO	O + OHCHCHOH	31.66	8.64e-26	cm^3 molecules^-1 s^-1	Group 197	[k1363, k1047, k1361, k1368, k1334, k1367, k1365, k1347, k1362, k1366, k1369, k1359, k1364]	0.03
k1360	O + OHCHCHOH	O + OHCH2CHO	-31.66	4.73e-23	cm^3 molecules^-1 s^-1	Group 198	[k1372, k1048, k1370, k1377, k1336, k1376, k1374, k1349, k1371, k1360, k1375, k1378, k1373]	12.06
k1361	O + OHCH2CHO	OH + C2H3O2	-131.79	4.81e-23	cm^3 molecules^-1 s^-1	Group 197	[k1363, k1047, k1361, k1368, k1334, k1367, k1365, k1347, k1362, k1366, k1369, k1359, k1364]	16.42
k1362	O + OHCH2CHO	H2CO + CH2OO	-38.34	1.93e-23	cm^3 molecules^-1 s^-1	Group 197	[k1363, k1047, k1361, k1368, k1334, k1367, k1365, k1347, k1362, k1366, k1369, k1359, k1364]	6.59
k1363	O + OHCH2CHO	H2CO + HCOOH	-418.8	1.06e-23	cm^3 molecules^-1 s^-1	Group 197	[k1363, k1047, k1361, k1368, k1334, k1367, k1365, k1347, k1362, k1366, k1369, k1359, k1364]	3.62
k1364	O + OHCH2CHO	H2CO + H2CO2	64.2	7.73e-26	cm^3 molecules^-1 s^-1	Group 197	[k1363, k1047, k1361, k1368, k1334, k1367, k1365, k1347, k1362, k1366, k1369, k1359, k1364]	0.03
k1365	O + OHCH2CHO	O2 + CH2CHOH	-55.75	3.85e-23	cm^3 molecules^-1 s^-1	Group 197	[k1363, k1047, k1361, k1368, k1334, k1367, k1365, k1347, k1362, k1366, k1369, k1359, k1364]	13.15
k1366	O + OHCH2CHO	O2 + CH2OCH2	17.66	2.60e-25	cm^3 molecules^-1 s^-1	Group 197	[k1363, k1047, k1361, k1368, k1334, k1367, k1365, k1347, k1362, k1366, k1369, k1359, k1364]	0.09
k1367	O + OHCH2CHO	O2 + CH3CHO	-97.4	3.65e-23	cm^3 molecules^-1 s^-1	Group 197	[k1363, k1047, k1361, k1368, k1334, k1367, k1365, k1347, k1362, k1366, k1369, k1359, k1364]	12.46
k1368	O + OHCH2CHO	H2O2 + H2CCO	-117.14	4.60e-23	cm^3 molecules^-1 s^-1	Group 197	[k1363, k1047, k1361, k1368, k1334, k1367, k1365, k1347, k1362, k1366, k1369, k1359, k1364]	15.71
k1369	O + OHCH2CHO	H2O2 + HCCOH	23.51	2.66e-26	cm^3 molecules^-1 s^-1	Group 197	[k1363, k1047, k1361, k1368, k1334, k1367, k1365, k1347, k1362, k1366, k1369, k1359, k1364]	0.01
k1370	O + OHCHCHOH	OH + C2H3O2	-163.45	4.09e-23	cm^3 molecules^-1 s^-1	Group 198	[k1372, k1048, k1370, k1377, k1336, k1376, k1374, k1349, k1371, k1360, k1375, k1378, k1373]	10.43
k1371	O + OHCHCHOH	H2CO + CH2OO	-70.0	4.04e-23	cm^3 molecules^-1 s^-1	Group 198	[k1372, k1048, k1370, k1377, k1336, k1376, k1374, k1349, k1371, k1360, k1375, k1378, k1373]	10.30
k1372	O + OHCHCHOH	H2CO + HCOOH	-450.46	4.77e-23	cm^3 molecules^-1 s^-1	Group 198	[k1372, k1048, k1370, k1377, k1336, k1376, k1374, k1349, k1371, k1360, k1375, k1378, k1373]	12.16
k1373	O + OHCHCHOH	H2CO + H2CO2	32.54	1.46e-25	cm^3 molecules^-1 s^-1	Group 198	[k1372, k1048, k1370, k1377, k1336, k1376, k1374, k1349, k1371, k1360, k1375, k1378, k1373]	0.04
k1374	O + OHCHCHOH	O2 + CH2CHOH	-87.41	5.24e-23	cm^3 molecules^-1 s^-1	Group 198	[k1372, k1048, k1370, k1377, k1336, k1376, k1374, k1349, k1371, k1360, k1375, k1378, k1373]	13.36
k1375	O + OHCHCHOH	O2 + CH2OCH2	-14.0	1.51e-25	cm^3 molecules^-1 s^-1	Group 198	[k1372, k1048, k1370, k1377, k1336, k1376, k1374, k1349, k1371, k1360, k1375, k1378, k1373]	0.04
k1376	O + OHCHCHOH	O2 + CH3CHO	-129.06	3.49e-23	cm^3 molecules^-1 s^-1	Group 198	[k1372, k1048, k1370, k1377, k1336, k1376, k1374, k1349, k1371, k1360, k1375, k1378, k1373]	8.90
k1377	O + OHCHCHOH	H2O2 + H2CCO	-148.8	1.80e-23	cm^3 molecules^-1 s^-1	Group 198	[k1372, k1048, k1370, k1377, k1336, k1376, k1374, k1349, k1371, k1360, k1375, k1378, k1373]	4.59
k1378	O + OHCHCHOH	H2O2 + HCCOH	-8.15	1.32e-24	cm^3 molecules^-1 s^-1	Group 198	[k1372, k1048, k1370, k1377, k1336, k1376, k1374, k1349, k1371, k1360, k1375, k1378, k1373]	0.34
k1379	O + CH3CHOHCH3	O + CH3OCH2CH3	53.89	6.84e-24	cm^3 molecules^-1 s^-1	Group 165	[k1383, k1393, k1387, k1384, k1385, k524, k1400, k1386, k1390, k1388, k1398, k1391, k1399, k1397, k1392, k1389, k1395, k1396, k1151, k1381, k1128, k1122, k1394, k1379, k1125]	0.86
k1380	O + CH3OCH2CH3	O + CH3CHOHCH3	-53.89	1.72e-23	cm^3 molecules^-1 s^-1	Group 171	[k1403, k1413, k1407, k1404, k1405, k526, k1420, k1406, k1410, k1408, k1418, k1411, k1419, k1417, k1412, k1409, k1415, k1416, k1380, k1152, k1401, k1129, k1123, k1414, k1126]	2.20
k1381	O + CH3CHOHCH3	O + CH3CH2CH2OH	17.41	1.82e-23	cm^3 molecules^-1 s^-1	Group 165	[k1383, k1393, k1387, k1384, k1385, k524, k1400, k1386, k1390, k1388, k1398, k1391, k1399, k1397, k1392, k1389, k1395, k1396, k1151, k1381, k1128, k1122, k1394, k1379, k1125]	2.29
k1382	O + CH3CH2CH2OH	O + CH3CHOHCH3	-17.41	4.44e-23	cm^3 molecules^-1 s^-1	Group 159	[k1421, k1431, k1425, k1422, k1423, k528, k1438, k1424, k1428, k1426, k1436, k1429, k1437, k1435, k1430, k1427, k1433, k1434, k1382, k1153, k1130, k1124, k1432, k1402, k1127]	7.27
k1383	O + CH3CHOHCH3	CH4 + CH3COOH	-483.25	4.70e-23	cm^3 molecules^-1 s^-1	Group 165	[k1383, k1393, k1387, k1384, k1385, k524, k1400, k1386, k1390, k1388, k1398, k1391, k1399, k1397, k1392, k1389, k1395, k1396, k1151, k1381, k1128, k1122, k1394, k1379, k1125]	5.91
k1384	O + CH3CHOHCH3	CH4 + HCOOCH3	-411.66	1.56e-23	cm^3 molecules^-1 s^-1	Group 165	[k1383, k1393, k1387, k1384, k1385, k524, k1400, k1386, k1390, k1388, k1398, k1391, k1399, k1397, k1392, k1389, k1395, k1396, k1151, k1381, k1128, k1122, k1394, k1379, k1125]	1.96
k1385	O + CH3CHOHCH3	CH4 + OHCH2CHO	-369.19	3.66e-23	cm^3 molecules^-1 s^-1	Group 165	[k1383, k1393, k1387, k1384, k1385, k524, k1400, k1386, k1390, k1388, k1398, k1391, k1399, k1397, k1392, k1389, k1395, k1396, k1151, k1381, k1128, k1122, k1394, k1379, k1125]	4.60
k1386	O + CH3CHOHCH3	CH4 + OHCHCHOH	-337.53	3.31e-23	cm^3 molecules^-1 s^-1	Group 165	[k1383, k1393, k1387, k1384, k1385, k524, k1400, k1386, k1390, k1388, k1398, k1391, k1399, k1397, k1392, k1389, k1395, k1396, k1151, k1381, k1128, k1122, k1394, k1379, k1125]	4.16
k1387	O + CH3CHOHCH3	H2O + CH3COCH3	-437.05	2.12e-23	cm^3 molecules^-1 s^-1	Group 165	[k1383, k1393, k1387, k1384, k1385, k524, k1400, k1386, k1390, k1388, k1398, k1391, k1399, k1397, k1392, k1389, k1395, k1396, k1151, k1381, k1128, k1122, k1394, k1379, k1125]	2.67
k1388	O + CH3CHOHCH3	CH2CH2 + CH2OHOH	-316.44	3.53e-23	cm^3 molecules^-1 s^-1	Group 165	[k1383, k1393, k1387, k1384, k1385, k524, k1400, k1386, k1390, k1388, k1398, k1391, k1399, k1397, k1392, k1389, k1395, k1396, k1151, k1381, k1128, k1122, k1394, k1379, k1125]	4.44
k1389	O + CH3CHOHCH3	CH2CH2 + CH3OOH	-52.15	5.02e-23	cm^3 molecules^-1 s^-1	Group 165	[k1383, k1393, k1387, k1384, k1385, k524, k1400, k1386, k1390, k1388, k1398, k1391, k1399, k1397, k1392, k1389, k1395, k1396, k1151, k1381, k1128, k1122, k1394, k1379, k1125]	6.31
k1390	O + CH3CHOHCH3	H2CO + CH3CH2OH	-320.87	3.99e-23	cm^3 molecules^-1 s^-1	Group 165	[k1383, k1393, k1387, k1384, k1385, k524, k1400, k1386, k1390, k1388, k1398, k1391, k1399, k1397, k1392, k1389, k1395, k1396, k1151, k1381, k1128, k1122, k1394, k1379, k1125]	5.02
k1391	O + CH3CHOHCH3	H2CO + CH3OCH3	-270.06	4.67e-23	cm^3 molecules^-1 s^-1	Group 165	[k1383, k1393, k1387, k1384, k1385, k524, k1400, k1386, k1390, k1388, k1398, k1391, k1399, k1397, k1392, k1389, k1395, k1396, k1151, k1381, k1128, k1122, k1394, k1379, k1125]	5.87
k1392	O + CH3CHOHCH3	CH3CH3 + CH2OO	-57.15	3.67e-23	cm^3 molecules^-1 s^-1	Group 165	[k1383, k1393, k1387, k1384, k1385, k524, k1400, k1386, k1390, k1388, k1398, k1391, k1399, k1397, k1392, k1389, k1395, k1396, k1151, k1381, k1128, k1122, k1394, k1379, k1125]	4.61
k1393	O + CH3CHOHCH3	CH3CH3 + HCOOH	-437.61	2.79e-23	cm^3 molecules^-1 s^-1	Group 165	[k1383, k1393, k1387, k1384, k1385, k524, k1400, k1386, k1390, k1388, k1398, k1391, k1399, k1397, k1392, k1389, k1395, k1396, k1151, k1381, k1128, k1122, k1394, k1379, k1125]	3.51
k1394	O + CH3CHOHCH3	CH3CH3 + H2CO2	45.39	5.24e-23	cm^3 molecules^-1 s^-1	Group 165	[k1383, k1393, k1387, k1384, k1385, k524, k1400, k1386, k1390, k1388, k1398, k1391, k1399, k1397, k1392, k1389, k1395, k1396, k1151, k1381, k1128, k1122, k1394, k1379, k1125]	6.59
k1395	O + CH3CHOHCH3	CH2OH + HOCHCH3	-51.4	4.04e-23	cm^3 molecules^-1 s^-1	Group 165	[k1383, k1393, k1387, k1384, k1385, k524, k1400, k1386, k1390, k1388, k1398, k1391, k1399, k1397, k1392, k1389, k1395, k1396, k1151, k1381, k1128, k1122, k1394, k1379, k1125]	5.08
k1396	O + CH3CHOHCH3	CH3O + HOCHCH3	-12.11	4.68e-23	cm^3 molecules^-1 s^-1	Group 165	[k1383, k1393, k1387, k1384, k1385, k524, k1400, k1386, k1390, k1388, k1398, k1391, k1399, k1397, k1392, k1389, k1395, k1396, k1151, k1381, k1128, k1122, k1394, k1379, k1125]	5.88
k1397	O + CH3CHOHCH3	O2 + CH3CH2CH3	-80.89	1.11e-23	cm^3 molecules^-1 s^-1	Group 165	[k1383, k1393, k1387, k1384, k1385, k524, k1400, k1386, k1390, k1388, k1398, k1391, k1399, k1397, k1392, k1389, k1395, k1396, k1151, k1381, k1128, k1122, k1394, k1379, k1125]	1.40
k1398	O + CH3CHOHCH3	CH3OH + CH2CHOH	-301.59	1.90e-23	cm^3 molecules^-1 s^-1	Group 165	[k1383, k1393, k1387, k1384, k1385, k524, k1400, k1386, k1390, k1388, k1398, k1391, k1399, k1397, k1392, k1389, k1395, k1396, k1151, k1381, k1128, k1122, k1394, k1379, k1125]	2.39
k1399	O + CH3CHOHCH3	CH3OH + CH2OCH2	-228.18	2.87e-23	cm^3 molecules^-1 s^-1	Group 165	[k1383, k1393, k1387, k1384, k1385, k524, k1400, k1386, k1390, k1388, k1398, k1391, k1399, k1397, k1392, k1389, k1395, k1396, k1151, k1381, k1128, k1122, k1394, k1379, k1125]	3.61
k1400	O + CH3CHOHCH3	CH3OH + CH3CHO	-343.24	3.04e-23	cm^3 molecules^-1 s^-1	Group 165	[k1383, k1393, k1387, k1384, k1385, k524, k1400, k1386, k1390, k1388, k1398, k1391, k1399, k1397, k1392, k1389, k1395, k1396, k1151, k1381, k1128, k1122, k1394, k1379, k1125]	3.82
k1401	O + CH3OCH2CH3	O + CH3CH2CH2OH	-36.48	2.01e-23	cm^3 molecules^-1 s^-1	Group 171	[k1403, k1413, k1407, k1404, k1405, k526, k1420, k1406, k1410, k1408, k1418, k1411, k1419, k1417, k1412, k1409, k1415, k1416, k1380, k1152, k1401, k1129, k1123, k1414, k1126]	2.57
k1402	O + CH3CH2CH2OH	O + CH3OCH2CH3	36.48	5.21e-25	cm^3 molecules^-1 s^-1	Group 159	[k1421, k1431, k1425, k1422, k1423, k528, k1438, k1424, k1428, k1426, k1436, k1429, k1437, k1435, k1430, k1427, k1433, k1434, k1382, k1153, k1130, k1124, k1432, k1402, k1127]	0.09
k1403	O + CH3OCH2CH3	CH4 + CH3COOH	-537.14	2.95e-23	cm^3 molecules^-1 s^-1	Group 171	[k1403, k1413, k1407, k1404, k1405, k526, k1420, k1406, k1410, k1408, k1418, k1411, k1419, k1417, k1412, k1409, k1415, k1416, k1380, k1152, k1401, k1129, k1123, k1414, k1126]	3.78
k1404	O + CH3OCH2CH3	CH4 + HCOOCH3	-465.55	1.71e-23	cm^3 molecules^-1 s^-1	Group 171	[k1403, k1413, k1407, k1404, k1405, k526, k1420, k1406, k1410, k1408, k1418, k1411, k1419, k1417, k1412, k1409, k1415, k1416, k1380, k1152, k1401, k1129, k1123, k1414, k1126]	2.19
k1405	O + CH3OCH2CH3	CH4 + OHCH2CHO	-423.08	5.24e-23	cm^3 molecules^-1 s^-1	Group 171	[k1403, k1413, k1407, k1404, k1405, k526, k1420, k1406, k1410, k1408, k1418, k1411, k1419, k1417, k1412, k1409, k1415, k1416, k1380, k1152, k1401, k1129, k1123, k1414, k1126]	6.71
k1406	O + CH3OCH2CH3	CH4 + OHCHCHOH	-391.42	5.15e-23	cm^3 molecules^-1 s^-1	Group 171	[k1403, k1413, k1407, k1404, k1405, k526, k1420, k1406, k1410, k1408, k1418, k1411, k1419, k1417, k1412, k1409, k1415, k1416, k1380, k1152, k1401, k1129, k1123, k1414, k1126]	6.60
k1407	O + CH3OCH2CH3	H2O + CH3COCH3	-490.94	3.26e-23	cm^3 molecules^-1 s^-1	Group 171	[k1403, k1413, k1407, k1404, k1405, k526, k1420, k1406, k1410, k1408, k1418, k1411, k1419, k1417, k1412, k1409, k1415, k1416, k1380, k1152, k1401, k1129, k1123, k1414, k1126]	4.18
k1408	O + CH3OCH2CH3	CH2CH2 + CH2OHOH	-370.33	2.50e-23	cm^3 molecules^-1 s^-1	Group 171	[k1403, k1413, k1407, k1404, k1405, k526, k1420, k1406, k1410, k1408, k1418, k1411, k1419, k1417, k1412, k1409, k1415, k1416, k1380, k1152, k1401, k1129, k1123, k1414, k1126]	3.20
k1409	O + CH3OCH2CH3	CH2CH2 + CH3OOH	-106.04	2.56e-23	cm^3 molecules^-1 s^-1	Group 171	[k1403, k1413, k1407, k1404, k1405, k526, k1420, k1406, k1410, k1408, k1418, k1411, k1419, k1417, k1412, k1409, k1415, k1416, k1380, k1152, k1401, k1129, k1123, k1414, k1126]	3.28
k1410	O + CH3OCH2CH3	H2CO + CH3CH2OH	-374.76	5.95e-24	cm^3 molecules^-1 s^-1	Group 171	[k1403, k1413, k1407, k1404, k1405, k526, k1420, k1406, k1410, k1408, k1418, k1411, k1419, k1417, k1412, k1409, k1415, k1416, k1380, k1152, k1401, k1129, k1123, k1414, k1126]	0.76
k1411	O + CH3OCH2CH3	H2CO + CH3OCH3	-323.95	5.08e-23	cm^3 molecules^-1 s^-1	Group 171	[k1403, k1413, k1407, k1404, k1405, k526, k1420, k1406, k1410, k1408, k1418, k1411, k1419, k1417, k1412, k1409, k1415, k1416, k1380, k1152, k1401, k1129, k1123, k1414, k1126]	6.51
k1412	O + CH3OCH2CH3	CH3CH3 + CH2OO	-111.04	3.07e-23	cm^3 molecules^-1 s^-1	Group 171	[k1403, k1413, k1407, k1404, k1405, k526, k1420, k1406, k1410, k1408, k1418, k1411, k1419, k1417, k1412, k1409, k1415, k1416, k1380, k1152, k1401, k1129, k1123, k1414, k1126]	3.93
k1413	O + CH3OCH2CH3	CH3CH3 + HCOOH	-491.5	3.97e-23	cm^3 molecules^-1 s^-1	Group 171	[k1403, k1413, k1407, k1404, k1405, k526, k1420, k1406, k1410, k1408, k1418, k1411, k1419, k1417, k1412, k1409, k1415, k1416, k1380, k1152, k1401, k1129, k1123, k1414, k1126]	5.08
k1414	O + CH3OCH2CH3	CH3CH3 + H2CO2	-8.5	5.24e-23	cm^3 molecules^-1 s^-1	Group 171	[k1403, k1413, k1407, k1404, k1405, k526, k1420, k1406, k1410, k1408, k1418, k1411, k1419, k1417, k1412, k1409, k1415, k1416, k1380, k1152, k1401, k1129, k1123, k1414, k1126]	6.71
k1415	O + CH3OCH2CH3	CH2OH + HOCHCH3	-105.29	3.54e-23	cm^3 molecules^-1 s^-1	Group 171	[k1403, k1413, k1407, k1404, k1405, k526, k1420, k1406, k1410, k1408, k1418, k1411, k1419, k1417, k1412, k1409, k1415, k1416, k1380, k1152, k1401, k1129, k1123, k1414, k1126]	4.53
k1416	O + CH3OCH2CH3	CH3O + HOCHCH3	-66.0	2.77e-23	cm^3 molecules^-1 s^-1	Group 171	[k1403, k1413, k1407, k1404, k1405, k526, k1420, k1406, k1410, k1408, k1418, k1411, k1419, k1417, k1412, k1409, k1415, k1416, k1380, k1152, k1401, k1129, k1123, k1414, k1126]	3.55
k1417	O + CH3OCH2CH3	O2 + CH3CH2CH3	-134.78	3.38e-23	cm^3 molecules^-1 s^-1	Group 171	[k1403, k1413, k1407, k1404, k1405, k526, k1420, k1406, k1410, k1408, k1418, k1411, k1419, k1417, k1412, k1409, k1415, k1416, k1380, k1152, k1401, k1129, k1123, k1414, k1126]	4.33
k1418	O + CH3OCH2CH3	CH3OH + CH2CHOH	-355.48	2.52e-23	cm^3 molecules^-1 s^-1	Group 171	[k1403, k1413, k1407, k1404, k1405, k526, k1420, k1406, k1410, k1408, k1418, k1411, k1419, k1417, k1412, k1409, k1415, k1416, k1380, k1152, k1401, k1129, k1123, k1414, k1126]	3.23
k1419	O + CH3OCH2CH3	CH3OH + CH2OCH2	-282.07	1.75e-23	cm^3 molecules^-1 s^-1	Group 171	[k1403, k1413, k1407, k1404, k1405, k526, k1420, k1406, k1410, k1408, k1418, k1411, k1419, k1417, k1412, k1409, k1415, k1416, k1380, k1152, k1401, k1129, k1123, k1414, k1126]	2.24
k1420	O + CH3OCH2CH3	CH3OH + CH3CHO	-397.13	3.45e-23	cm^3 molecules^-1 s^-1	Group 171	[k1403, k1413, k1407, k1404, k1405, k526, k1420, k1406, k1410, k1408, k1418, k1411, k1419, k1417, k1412, k1409, k1415, k1416, k1380, k1152, k1401, k1129, k1123, k1414, k1126]	4.42
k1421	O + CH3CH2CH2OH	CH4 + CH3COOH	-500.66	2.82e-23	cm^3 molecules^-1 s^-1	Group 159	[k1421, k1431, k1425, k1422, k1423, k528, k1438, k1424, k1428, k1426, k1436, k1429, k1437, k1435, k1430, k1427, k1433, k1434, k1382, k1153, k1130, k1124, k1432, k1402, k1127]	4.62
k1422	O + CH3CH2CH2OH	CH4 + HCOOCH3	-429.07	5.24e-23	cm^3 molecules^-1 s^-1	Group 159	[k1421, k1431, k1425, k1422, k1423, k528, k1438, k1424, k1428, k1426, k1436, k1429, k1437, k1435, k1430, k1427, k1433, k1434, k1382, k1153, k1130, k1124, k1432, k1402, k1127]	8.58
k1423	O + CH3CH2CH2OH	CH4 + OHCH2CHO	-386.6	5.01e-23	cm^3 molecules^-1 s^-1	Group 159	[k1421, k1431, k1425, k1422, k1423, k528, k1438, k1424, k1428, k1426, k1436, k1429, k1437, k1435, k1430, k1427, k1433, k1434, k1382, k1153, k1130, k1124, k1432, k1402, k1127]	8.21
k1424	O + CH3CH2CH2OH	CH4 + OHCHCHOH	-354.94	2.11e-23	cm^3 molecules^-1 s^-1	Group 159	[k1421, k1431, k1425, k1422, k1423, k528, k1438, k1424, k1428, k1426, k1436, k1429, k1437, k1435, k1430, k1427, k1433, k1434, k1382, k1153, k1130, k1124, k1432, k1402, k1127]	3.46
k1425	O + CH3CH2CH2OH	H2O + CH3COCH3	-454.46	1.55e-23	cm^3 molecules^-1 s^-1	Group 159	[k1421, k1431, k1425, k1422, k1423, k528, k1438, k1424, k1428, k1426, k1436, k1429, k1437, k1435, k1430, k1427, k1433, k1434, k1382, k1153, k1130, k1124, k1432, k1402, k1127]	2.54
k1426	O + CH3CH2CH2OH	CH2CH2 + CH2OHOH	-333.85	1.79e-23	cm^3 molecules^-1 s^-1	Group 159	[k1421, k1431, k1425, k1422, k1423, k528, k1438, k1424, k1428, k1426, k1436, k1429, k1437, k1435, k1430, k1427, k1433, k1434, k1382, k1153, k1130, k1124, k1432, k1402, k1127]	2.93
k1427	O + CH3CH2CH2OH	CH2CH2 + CH3OOH	-69.56	1.00e-23	cm^3 molecules^-1 s^-1	Group 159	[k1421, k1431, k1425, k1422, k1423, k528, k1438, k1424, k1428, k1426, k1436, k1429, k1437, k1435, k1430, k1427, k1433, k1434, k1382, k1153, k1130, k1124, k1432, k1402, k1127]	1.64
k1428	O + CH3CH2CH2OH	H2CO + CH3CH2OH	-338.28	9.80e-24	cm^3 molecules^-1 s^-1	Group 159	[k1421, k1431, k1425, k1422, k1423, k528, k1438, k1424, k1428, k1426, k1436, k1429, k1437, k1435, k1430, k1427, k1433, k1434, k1382, k1153, k1130, k1124, k1432, k1402, k1127]	1.61
k1429	O + CH3CH2CH2OH	H2CO + CH3OCH3	-287.47	1.37e-23	cm^3 molecules^-1 s^-1	Group 159	[k1421, k1431, k1425, k1422, k1423, k528, k1438, k1424, k1428, k1426, k1436, k1429, k1437, k1435, k1430, k1427, k1433, k1434, k1382, k1153, k1130, k1124, k1432, k1402, k1127]	2.24
k1430	O + CH3CH2CH2OH	CH3CH3 + CH2OO	-74.56	2.52e-23	cm^3 molecules^-1 s^-1	Group 159	[k1421, k1431, k1425, k1422, k1423, k528, k1438, k1424, k1428, k1426, k1436, k1429, k1437, k1435, k1430, k1427, k1433, k1434, k1382, k1153, k1130, k1124, k1432, k1402, k1127]	4.13
k1431	O + CH3CH2CH2OH	CH3CH3 + HCOOH	-455.02	1.22e-23	cm^3 molecules^-1 s^-1	Group 159	[k1421, k1431, k1425, k1422, k1423, k528, k1438, k1424, k1428, k1426, k1436, k1429, k1437, k1435, k1430, k1427, k1433, k1434, k1382, k1153, k1130, k1124, k1432, k1402, k1127]	2.00
k1432	O + CH3CH2CH2OH	CH3CH3 + H2CO2	27.98	3.76e-24	cm^3 molecules^-1 s^-1	Group 159	[k1421, k1431, k1425, k1422, k1423, k528, k1438, k1424, k1428, k1426, k1436, k1429, k1437, k1435, k1430, k1427, k1433, k1434, k1382, k1153, k1130, k1124, k1432, k1402, k1127]	0.62
k1433	O + CH3CH2CH2OH	CH2OH + HOCHCH3	-68.81	3.88e-23	cm^3 molecules^-1 s^-1	Group 159	[k1421, k1431, k1425, k1422, k1423, k528, k1438, k1424, k1428, k1426, k1436, k1429, k1437, k1435, k1430, k1427, k1433, k1434, k1382, k1153, k1130, k1124, k1432, k1402, k1127]	6.36
k1434	O + CH3CH2CH2OH	CH3O + HOCHCH3	-29.52	5.28e-23	cm^3 molecules^-1 s^-1	Group 159	[k1421, k1431, k1425, k1422, k1423, k528, k1438, k1424, k1428, k1426, k1436, k1429, k1437, k1435, k1430, k1427, k1433, k1434, k1382, k1153, k1130, k1124, k1432, k1402, k1127]	8.65
k1435	O + CH3CH2CH2OH	O2 + CH3CH2CH3	-98.3	4.07e-23	cm^3 molecules^-1 s^-1	Group 159	[k1421, k1431, k1425, k1422, k1423, k528, k1438, k1424, k1428, k1426, k1436, k1429, k1437, k1435, k1430, k1427, k1433, k1434, k1382, k1153, k1130, k1124, k1432, k1402, k1127]	6.67
k1436	O + CH3CH2CH2OH	CH3OH + CH2CHOH	-319.0	2.06e-23	cm^3 molecules^-1 s^-1	Group 159	[k1421, k1431, k1425, k1422, k1423, k528, k1438, k1424, k1428, k1426, k1436, k1429, k1437, k1435, k1430, k1427, k1433, k1434, k1382, k1153, k1130, k1124, k1432, k1402, k1127]	3.37
k1437	O + CH3CH2CH2OH	CH3OH + CH2OCH2	-245.59	9.74e-24	cm^3 molecules^-1 s^-1	Group 159	[k1421, k1431, k1425, k1422, k1423, k528, k1438, k1424, k1428, k1426, k1436, k1429, k1437, k1435, k1430, k1427, k1433, k1434, k1382, k1153, k1130, k1124, k1432, k1402, k1127]	1.60
k1438	O + CH3CH2CH2OH	CH3OH + CH3CHO	-360.65	3.80e-23	cm^3 molecules^-1 s^-1	Group 159	[k1421, k1431, k1425, k1422, k1423, k528, k1438, k1424, k1428, k1426, k1436, k1429, k1437, k1435, k1430, k1427, k1433, k1434, k1382, k1153, k1130, k1124, k1432, k1402, k1127]	6.22
k1439	O + HCO3	HO2 + CO2	94.49	5.24e-23	cm^3 molecules^-1 s^-1	Single (order=2)	-	100.00
k1440	O + CH3OCHOH	OH + CH3COOH	-484.0	4.96e-23	cm^3 molecules^-1 s^-1	Group 174	[k1440, k1441, k1442, k1443, k1444]	46.33
k1441	O + CH3OCHOH	OH + HCOOCH3	-412.41	4.16e-23	cm^3 molecules^-1 s^-1	Group 174	[k1440, k1441, k1442, k1443, k1444]	38.85
k1442	O + CH3OCHOH	OH + OHCH2CHO	-369.94	1.55e-23	cm^3 molecules^-1 s^-1	Group 174	[k1440, k1441, k1442, k1443, k1444]	14.48
k1443	O + CH3OCHOH	OH + OHCHCHOH	-338.28	1.49e-25	cm^3 molecules^-1 s^-1	Group 174	[k1440, k1441, k1442, k1443, k1444]	0.14
k1444	O + CH3OCHOH	O2 + HOCHCH3	-145.61	2.16e-25	cm^3 molecules^-1 s^-1	Group 174	[k1440, k1441, k1442, k1443, k1444]	0.20
k1445	O + H2CO3	OH + HCO3	-326.54	1.85e-23	cm^3 molecules^-1 s^-1	Group 185	[k1445, k1449, k1446, k1447, k1448]	66.30
k1446	O + H2CO3	H2O + CO3	-43.11	1.35e-25	cm^3 molecules^-1 s^-1	Group 185	[k1445, k1449, k1446, k1447, k1448]	0.48
k1447	O + H2CO3	O2 + HCOOH	-15.57	2.39e-26	cm^3 molecules^-1 s^-1	Group 185	[k1445, k1449, k1446, k1447, k1448]	0.09
k1448	O + H2CO3	HO2 + HOCO	189.44	1.44e-25	cm^3 molecules^-1 s^-1	Group 185	[k1445, k1449, k1446, k1447, k1448]	0.52
k1449	O + H2CO3	H2O2 + CO2	-167.04	9.10e-24	cm^3 molecules^-1 s^-1	Group 185	[k1445, k1449, k1446, k1447, k1448]	32.61
k1450	O + CH3CHOHOH	O + CH3OCH2OH	54.46	1.22e-23	cm^3 molecules^-1 s^-1	Group 166	[k1455, k1457, k1458, k1467, k1459, k1460, k1461, k1472, k1470, k1462, k1464, k1466, k1471, k1465, k1453, k1456, k1468, k1450, k1469, k1463]	2.21
k1451	O + CH3OCH2OH	O + CH3CHOHOH	-54.46	7.58e-25	cm^3 molecules^-1 s^-1	Group 172	[k1476, k1478, k1479, k1488, k1480, k1481, k1482, k1493, k1491, k1483, k1485, k1487, k1492, k1486, k1474, k1477, k1451, k1489, k1490, k1484]	0.15
k1452	O + CH3OOCH3	O + CH3CHOHOH	-277.67	2.44e-23	cm^3 molecules^-1 s^-1	Group 176	[k1495, k1497, k1498, k1507, k1499, k1500, k1501, k1512, k1510, k1502, k1504, k1506, k1511, k1505, k1494, k1496, k1452, k1508, k1473, k1509, k1503]	3.73
k1453	O + CH3CHOHOH	O + HOCH2CH2OH	-16.97	8.19e-24	cm^3 molecules^-1 s^-1	Group 166	[k1455, k1457, k1458, k1467, k1459, k1460, k1461, k1472, k1470, k1462, k1464, k1466, k1471, k1465, k1453, k1456, k1468, k1450, k1469, k1463]	1.48
k1454	O + HOCH2CH2OH	O + CH3CHOHOH	16.97	9.76e-26	cm^3 molecules^-1 s^-1	Group 192	[k1513, k1515, k1516, k1525, k1517, k1518, k1519, k1530, k1528, k1520, k1522, k1524, k1529, k1523, k1514, k1454, k1526, k1475, k1527, k1521]	0.02
k1455	O + CH3CHOHOH	CH4 + H2CO3	-563.02	4.54e-23	cm^3 molecules^-1 s^-1	Group 166	[k1455, k1457, k1458, k1467, k1459, k1460, k1461, k1472, k1470, k1462, k1464, k1466, k1471, k1465, k1453, k1456, k1468, k1450, k1469, k1463]	8.23
k1456	O + CH3CHOHOH	OH + CH3OCHOH	-0.96	2.89e-23	cm^3 molecules^-1 s^-1	Group 166	[k1455, k1457, k1458, k1467, k1459, k1460, k1461, k1472, k1470, k1462, k1464, k1466, k1471, k1465, k1453, k1456, k1468, k1450, k1469, k1463]	5.24
k1457	O + CH3CHOHOH	H2O + CH3COOH	-551.57	2.22e-23	cm^3 molecules^-1 s^-1	Group 166	[k1455, k1457, k1458, k1467, k1459, k1460, k1461, k1472, k1470, k1462, k1464, k1466, k1471, k1465, k1453, k1456, k1468, k1450, k1469, k1463]	4.03
k1458	O + CH3CHOHOH	H2O + HCOOCH3	-479.98	9.29e-24	cm^3 molecules^-1 s^-1	Group 166	[k1455, k1457, k1458, k1467, k1459, k1460, k1461, k1472, k1470, k1462, k1464, k1466, k1471, k1465, k1453, k1456, k1468, k1450, k1469, k1463]	1.68
k1459	O + CH3CHOHOH	H2O + OHCH2CHO	-437.51	4.73e-23	cm^3 molecules^-1 s^-1	Group 166	[k1455, k1457, k1458, k1467, k1459, k1460, k1461, k1472, k1470, k1462, k1464, k1466, k1471, k1465, k1453, k1456, k1468, k1450, k1469, k1463]	8.58
k1460	O + CH3CHOHOH	H2O + OHCHCHOH	-405.85	3.06e-23	cm^3 molecules^-1 s^-1	Group 166	[k1455, k1457, k1458, k1467, k1459, k1460, k1461, k1472, k1470, k1462, k1464, k1466, k1471, k1465, k1453, k1456, k1468, k1450, k1469, k1463]	5.55
k1461	O + CH3CHOHOH	H2CO + CH2OHOH	-378.69	4.48e-23	cm^3 molecules^-1 s^-1	Group 166	[k1455, k1457, k1458, k1467, k1459, k1460, k1461, k1472, k1470, k1462, k1464, k1466, k1471, k1465, k1453, k1456, k1468, k1450, k1469, k1463]	8.12
k1462	O + CH3CHOHOH	H2CO + CH3OOH	-114.4	1.57e-23	cm^3 molecules^-1 s^-1	Group 166	[k1455, k1457, k1458, k1467, k1459, k1460, k1461, k1472, k1470, k1462, k1464, k1466, k1471, k1465, k1453, k1456, k1468, k1450, k1469, k1463]	2.85
k1463	O + CH3CHOHOH	CH3CH3 + O3	181.86	2.59e-25	cm^3 molecules^-1 s^-1	Group 166	[k1455, k1457, k1458, k1467, k1459, k1460, k1461, k1472, k1470, k1462, k1464, k1466, k1471, k1465, k1453, k1456, k1468, k1450, k1469, k1463]	0.05
k1464	O + CH3CHOHOH	O2 + CH3CH2OH	-111.47	2.36e-23	cm^3 molecules^-1 s^-1	Group 166	[k1455, k1457, k1458, k1467, k1459, k1460, k1461, k1472, k1470, k1462, k1464, k1466, k1471, k1465, k1453, k1456, k1468, k1450, k1469, k1463]	4.28
k1465	O + CH3CHOHOH	O2 + CH3OCH3	-60.66	5.24e-23	cm^3 molecules^-1 s^-1	Group 166	[k1455, k1457, k1458, k1467, k1459, k1460, k1461, k1472, k1470, k1462, k1464, k1466, k1471, k1465, k1453, k1456, k1468, k1450, k1469, k1463]	9.50
k1466	O + CH3CHOHOH	CH3OH + CH2OO	-74.78	4.13e-23	cm^3 molecules^-1 s^-1	Group 166	[k1455, k1457, k1458, k1467, k1459, k1460, k1461, k1472, k1470, k1462, k1464, k1466, k1471, k1465, k1453, k1456, k1468, k1450, k1469, k1463]	7.49
k1467	O + CH3CHOHOH	CH3OH + HCOOH	-455.24	4.21e-23	cm^3 molecules^-1 s^-1	Group 166	[k1455, k1457, k1458, k1467, k1459, k1460, k1461, k1472, k1470, k1462, k1464, k1466, k1471, k1465, k1453, k1456, k1468, k1450, k1469, k1463]	7.63
k1468	O + CH3CHOHOH	CH3OH + H2CO2	27.76	1.80e-23	cm^3 molecules^-1 s^-1	Group 166	[k1455, k1457, k1458, k1467, k1459, k1460, k1461, k1472, k1470, k1462, k1464, k1466, k1471, k1465, k1453, k1456, k1468, k1450, k1469, k1463]	3.26
k1469	O + CH3CHOHOH	HO2 + HOCHCH3	78.13	3.85e-23	cm^3 molecules^-1 s^-1	Group 166	[k1455, k1457, k1458, k1467, k1459, k1460, k1461, k1472, k1470, k1462, k1464, k1466, k1471, k1465, k1453, k1456, k1468, k1450, k1469, k1463]	6.98
k1470	O + CH3CHOHOH	H2O2 + CH2CHOH	-136.94	1.72e-23	cm^3 molecules^-1 s^-1	Group 166	[k1455, k1457, k1458, k1467, k1459, k1460, k1461, k1472, k1470, k1462, k1464, k1466, k1471, k1465, k1453, k1456, k1468, k1450, k1469, k1463]	3.12
k1471	O + CH3CHOHOH	H2O2 + CH2OCH2	-63.53	2.57e-23	cm^3 molecules^-1 s^-1	Group 166	[k1455, k1457, k1458, k1467, k1459, k1460, k1461, k1472, k1470, k1462, k1464, k1466, k1471, k1465, k1453, k1456, k1468, k1450, k1469, k1463]	4.66
k1472	O + CH3CHOHOH	H2O2 + CH3CHO	-178.59	2.79e-23	cm^3 molecules^-1 s^-1	Group 166	[k1455, k1457, k1458, k1467, k1459, k1460, k1461, k1472, k1470, k1462, k1464, k1466, k1471, k1465, k1453, k1456, k1468, k1450, k1469, k1463]	5.06
k1473	O + CH3OOCH3	O + CH3OCH2OH	-223.21	2.84e-23	cm^3 molecules^-1 s^-1	Group 176	[k1495, k1497, k1498, k1507, k1499, k1500, k1501, k1512, k1510, k1502, k1504, k1506, k1511, k1505, k1494, k1496, k1452, k1508, k1473, k1509, k1503]	4.34
k1474	O + CH3OCH2OH	O + HOCH2CH2OH	-71.43	4.94e-26	cm^3 molecules^-1 s^-1	Group 172	[k1476, k1478, k1479, k1488, k1480, k1481, k1482, k1493, k1491, k1483, k1485, k1487, k1492, k1486, k1474, k1477, k1451, k1489, k1490, k1484]	0.01
k1475	O + HOCH2CH2OH	O + CH3OCH2OH	71.43	1.32e-24	cm^3 molecules^-1 s^-1	Group 192	[k1513, k1515, k1516, k1525, k1517, k1518, k1519, k1530, k1528, k1520, k1522, k1524, k1529, k1523, k1514, k1454, k1526, k1475, k1527, k1521]	0.29
k1476	O + CH3OCH2OH	CH4 + H2CO3	-617.48	2.04e-23	cm^3 molecules^-1 s^-1	Group 172	[k1476, k1478, k1479, k1488, k1480, k1481, k1482, k1493, k1491, k1483, k1485, k1487, k1492, k1486, k1474, k1477, k1451, k1489, k1490, k1484]	4.11
k1477	O + CH3OCH2OH	OH + CH3OCHOH	-55.42	2.71e-25	cm^3 molecules^-1 s^-1	Group 172	[k1476, k1478, k1479, k1488, k1480, k1481, k1482, k1493, k1491, k1483, k1485, k1487, k1492, k1486, k1474, k1477, k1451, k1489, k1490, k1484]	0.05
k1478	O + CH3OCH2OH	H2O + CH3COOH	-606.03	2.88e-23	cm^3 molecules^-1 s^-1	Group 172	[k1476, k1478, k1479, k1488, k1480, k1481, k1482, k1493, k1491, k1483, k1485, k1487, k1492, k1486, k1474, k1477, k1451, k1489, k1490, k1484]	5.81
k1479	O + CH3OCH2OH	H2O + HCOOCH3	-534.44	2.50e-23	cm^3 molecules^-1 s^-1	Group 172	[k1476, k1478, k1479, k1488, k1480, k1481, k1482, k1493, k1491, k1483, k1485, k1487, k1492, k1486, k1474, k1477, k1451, k1489, k1490, k1484]	5.04
k1480	O + CH3OCH2OH	H2O + OHCH2CHO	-491.97	1.56e-23	cm^3 molecules^-1 s^-1	Group 172	[k1476, k1478, k1479, k1488, k1480, k1481, k1482, k1493, k1491, k1483, k1485, k1487, k1492, k1486, k1474, k1477, k1451, k1489, k1490, k1484]	3.15
k1481	O + CH3OCH2OH	H2O + OHCHCHOH	-460.31	4.92e-23	cm^3 molecules^-1 s^-1	Group 172	[k1476, k1478, k1479, k1488, k1480, k1481, k1482, k1493, k1491, k1483, k1485, k1487, k1492, k1486, k1474, k1477, k1451, k1489, k1490, k1484]	9.92
k1482	O + CH3OCH2OH	H2CO + CH2OHOH	-433.15	3.78e-23	cm^3 molecules^-1 s^-1	Group 172	[k1476, k1478, k1479, k1488, k1480, k1481, k1482, k1493, k1491, k1483, k1485, k1487, k1492, k1486, k1474, k1477, k1451, k1489, k1490, k1484]	7.62
k1483	O + CH3OCH2OH	H2CO + CH3OOH	-168.86	1.70e-23	cm^3 molecules^-1 s^-1	Group 172	[k1476, k1478, k1479, k1488, k1480, k1481, k1482, k1493, k1491, k1483, k1485, k1487, k1492, k1486, k1474, k1477, k1451, k1489, k1490, k1484]	3.43
k1484	O + CH3OCH2OH	CH3CH3 + O3	127.4	1.16e-25	cm^3 molecules^-1 s^-1	Group 172	[k1476, k1478, k1479, k1488, k1480, k1481, k1482, k1493, k1491, k1483, k1485, k1487, k1492, k1486, k1474, k1477, k1451, k1489, k1490, k1484]	0.02
k1485	O + CH3OCH2OH	O2 + CH3CH2OH	-165.93	5.28e-23	cm^3 molecules^-1 s^-1	Group 172	[k1476, k1478, k1479, k1488, k1480, k1481, k1482, k1493, k1491, k1483, k1485, k1487, k1492, k1486, k1474, k1477, k1451, k1489, k1490, k1484]	10.65
k1486	O + CH3OCH2OH	O2 + CH3OCH3	-115.12	1.92e-23	cm^3 molecules^-1 s^-1	Group 172	[k1476, k1478, k1479, k1488, k1480, k1481, k1482, k1493, k1491, k1483, k1485, k1487, k1492, k1486, k1474, k1477, k1451, k1489, k1490, k1484]	3.87
k1487	O + CH3OCH2OH	CH3OH + CH2OO	-129.24	4.56e-23	cm^3 molecules^-1 s^-1	Group 172	[k1476, k1478, k1479, k1488, k1480, k1481, k1482, k1493, k1491, k1483, k1485, k1487, k1492, k1486, k1474, k1477, k1451, k1489, k1490, k1484]	9.19
k1488	O + CH3OCH2OH	CH3OH + HCOOH	-509.7	4.72e-23	cm^3 molecules^-1 s^-1	Group 172	[k1476, k1478, k1479, k1488, k1480, k1481, k1482, k1493, k1491, k1483, k1485, k1487, k1492, k1486, k1474, k1477, k1451, k1489, k1490, k1484]	9.52
k1489	O + CH3OCH2OH	CH3OH + H2CO2	-26.7	2.28e-25	cm^3 molecules^-1 s^-1	Group 172	[k1476, k1478, k1479, k1488, k1480, k1481, k1482, k1493, k1491, k1483, k1485, k1487, k1492, k1486, k1474, k1477, k1451, k1489, k1490, k1484]	0.05
k1490	O + CH3OCH2OH	HO2 + HOCHCH3	23.67	1.04e-24	cm^3 molecules^-1 s^-1	Group 172	[k1476, k1478, k1479, k1488, k1480, k1481, k1482, k1493, k1491, k1483, k1485, k1487, k1492, k1486, k1474, k1477, k1451, k1489, k1490, k1484]	0.21
k1491	O + CH3OCH2OH	H2O2 + CH2CHOH	-191.4	5.24e-23	cm^3 molecules^-1 s^-1	Group 172	[k1476, k1478, k1479, k1488, k1480, k1481, k1482, k1493, k1491, k1483, k1485, k1487, k1492, k1486, k1474, k1477, k1451, k1489, k1490, k1484]	10.57
k1492	O + CH3OCH2OH	H2O2 + CH2OCH2	-117.99	3.08e-23	cm^3 molecules^-1 s^-1	Group 172	[k1476, k1478, k1479, k1488, k1480, k1481, k1482, k1493, k1491, k1483, k1485, k1487, k1492, k1486, k1474, k1477, k1451, k1489, k1490, k1484]	6.21
k1493	O + CH3OCH2OH	H2O2 + CH3CHO	-233.05	5.17e-23	cm^3 molecules^-1 s^-1	Group 172	[k1476, k1478, k1479, k1488, k1480, k1481, k1482, k1493, k1491, k1483, k1485, k1487, k1492, k1486, k1474, k1477, k1451, k1489, k1490, k1484]	10.42
k1494	O + CH3OOCH3	O + HOCH2CH2OH	-294.64	2.89e-23	cm^3 molecules^-1 s^-1	Group 176	[k1495, k1497, k1498, k1507, k1499, k1500, k1501, k1512, k1510, k1502, k1504, k1506, k1511, k1505, k1494, k1496, k1452, k1508, k1473, k1509, k1503]	4.41
k1495	O + CH3OOCH3	CH4 + H2CO3	-840.69	1.04e-23	cm^3 molecules^-1 s^-1	Group 176	[k1495, k1497, k1498, k1507, k1499, k1500, k1501, k1512, k1510, k1502, k1504, k1506, k1511, k1505, k1494, k1496, k1452, k1508, k1473, k1509, k1503]	1.59
k1496	O + CH3OOCH3	OH + CH3OCHOH	-278.63	4.66e-23	cm^3 molecules^-1 s^-1	Group 176	[k1495, k1497, k1498, k1507, k1499, k1500, k1501, k1512, k1510, k1502, k1504, k1506, k1511, k1505, k1494, k1496, k1452, k1508, k1473, k1509, k1503]	7.12
k1497	O + CH3OOCH3	H2O + CH3COOH	-829.24	2.94e-23	cm^3 molecules^-1 s^-1	Group 176	[k1495, k1497, k1498, k1507, k1499, k1500, k1501, k1512, k1510, k1502, k1504, k1506, k1511, k1505, k1494, k1496, k1452, k1508, k1473, k1509, k1503]	4.49
k1498	O + CH3OOCH3	H2O + HCOOCH3	-757.65	3.65e-23	cm^3 molecules^-1 s^-1	Group 176	[k1495, k1497, k1498, k1507, k1499, k1500, k1501, k1512, k1510, k1502, k1504, k1506, k1511, k1505, k1494, k1496, k1452, k1508, k1473, k1509, k1503]	5.57
k1499	O + CH3OOCH3	H2O + OHCH2CHO	-715.18	4.37e-23	cm^3 molecules^-1 s^-1	Group 176	[k1495, k1497, k1498, k1507, k1499, k1500, k1501, k1512, k1510, k1502, k1504, k1506, k1511, k1505, k1494, k1496, k1452, k1508, k1473, k1509, k1503]	6.67
k1500	O + CH3OOCH3	H2O + OHCHCHOH	-683.52	5.24e-23	cm^3 molecules^-1 s^-1	Group 176	[k1495, k1497, k1498, k1507, k1499, k1500, k1501, k1512, k1510, k1502, k1504, k1506, k1511, k1505, k1494, k1496, k1452, k1508, k1473, k1509, k1503]	8.00
k1501	O + CH3OOCH3	H2CO + CH2OHOH	-656.36	1.56e-23	cm^3 molecules^-1 s^-1	Group 176	[k1495, k1497, k1498, k1507, k1499, k1500, k1501, k1512, k1510, k1502, k1504, k1506, k1511, k1505, k1494, k1496, k1452, k1508, k1473, k1509, k1503]	2.38
k1502	O + CH3OOCH3	H2CO + CH3OOH	-392.07	1.63e-23	cm^3 molecules^-1 s^-1	Group 176	[k1495, k1497, k1498, k1507, k1499, k1500, k1501, k1512, k1510, k1502, k1504, k1506, k1511, k1505, k1494, k1496, k1452, k1508, k1473, k1509, k1503]	2.49
k1503	O + CH3OOCH3	CH3CH3 + O3	-95.81	1.38e-24	cm^3 molecules^-1 s^-1	Group 176	[k1495, k1497, k1498, k1507, k1499, k1500, k1501, k1512, k1510, k1502, k1504, k1506, k1511, k1505, k1494, k1496, k1452, k1508, k1473, k1509, k1503]	0.21
k1504	O + CH3OOCH3	O2 + CH3CH2OH	-389.14	4.69e-23	cm^3 molecules^-1 s^-1	Group 176	[k1495, k1497, k1498, k1507, k1499, k1500, k1501, k1512, k1510, k1502, k1504, k1506, k1511, k1505, k1494, k1496, k1452, k1508, k1473, k1509, k1503]	7.16
k1505	O + CH3OOCH3	O2 + CH3OCH3	-338.33	2.54e-23	cm^3 molecules^-1 s^-1	Group 176	[k1495, k1497, k1498, k1507, k1499, k1500, k1501, k1512, k1510, k1502, k1504, k1506, k1511, k1505, k1494, k1496, k1452, k1508, k1473, k1509, k1503]	3.88
k1506	O + CH3OOCH3	CH3OH + CH2OO	-352.45	5.14e-23	cm^3 molecules^-1 s^-1	Group 176	[k1495, k1497, k1498, k1507, k1499, k1500, k1501, k1512, k1510, k1502, k1504, k1506, k1511, k1505, k1494, k1496, k1452, k1508, k1473, k1509, k1503]	7.85
k1507	O + CH3OOCH3	CH3OH + HCOOH	-732.91	1.59e-23	cm^3 molecules^-1 s^-1	Group 176	[k1495, k1497, k1498, k1507, k1499, k1500, k1501, k1512, k1510, k1502, k1504, k1506, k1511, k1505, k1494, k1496, k1452, k1508, k1473, k1509, k1503]	2.43
k1508	O + CH3OOCH3	CH3OH + H2CO2	-249.91	4.56e-23	cm^3 molecules^-1 s^-1	Group 176	[k1495, k1497, k1498, k1507, k1499, k1500, k1501, k1512, k1510, k1502, k1504, k1506, k1511, k1505, k1494, k1496, k1452, k1508, k1473, k1509, k1503]	6.96
k1509	O + CH3OOCH3	HO2 + HOCHCH3	-199.54	9.57e-24	cm^3 molecules^-1 s^-1	Group 176	[k1495, k1497, k1498, k1507, k1499, k1500, k1501, k1512, k1510, k1502, k1504, k1506, k1511, k1505, k1494, k1496, k1452, k1508, k1473, k1509, k1503]	1.46
k1510	O + CH3OOCH3	H2O2 + CH2CHOH	-414.61	3.99e-23	cm^3 molecules^-1 s^-1	Group 176	[k1495, k1497, k1498, k1507, k1499, k1500, k1501, k1512, k1510, k1502, k1504, k1506, k1511, k1505, k1494, k1496, k1452, k1508, k1473, k1509, k1503]	6.09
k1511	O + CH3OOCH3	H2O2 + CH2OCH2	-341.2	5.23e-23	cm^3 molecules^-1 s^-1	Group 176	[k1495, k1497, k1498, k1507, k1499, k1500, k1501, k1512, k1510, k1502, k1504, k1506, k1511, k1505, k1494, k1496, k1452, k1508, k1473, k1509, k1503]	7.99
k1512	O + CH3OOCH3	H2O2 + CH3CHO	-456.26	3.40e-23	cm^3 molecules^-1 s^-1	Group 176	[k1495, k1497, k1498, k1507, k1499, k1500, k1501, k1512, k1510, k1502, k1504, k1506, k1511, k1505, k1494, k1496, k1452, k1508, k1473, k1509, k1503]	5.19
k1513	O + HOCH2CH2OH	CH4 + H2CO3	-546.05	2.47e-23	cm^3 molecules^-1 s^-1	Group 192	[k1513, k1515, k1516, k1525, k1517, k1518, k1519, k1530, k1528, k1520, k1522, k1524, k1529, k1523, k1514, k1454, k1526, k1475, k1527, k1521]	5.40
k1514	O + HOCH2CH2OH	OH + CH3OCHOH	16.01	1.13e-23	cm^3 molecules^-1 s^-1	Group 192	[k1513, k1515, k1516, k1525, k1517, k1518, k1519, k1530, k1528, k1520, k1522, k1524, k1529, k1523, k1514, k1454, k1526, k1475, k1527, k1521]	2.47
k1515	O + HOCH2CH2OH	H2O + CH3COOH	-534.6	9.15e-24	cm^3 molecules^-1 s^-1	Group 192	[k1513, k1515, k1516, k1525, k1517, k1518, k1519, k1530, k1528, k1520, k1522, k1524, k1529, k1523, k1514, k1454, k1526, k1475, k1527, k1521]	2.00
k1516	O + HOCH2CH2OH	H2O + HCOOCH3	-463.01	1.31e-23	cm^3 molecules^-1 s^-1	Group 192	[k1513, k1515, k1516, k1525, k1517, k1518, k1519, k1530, k1528, k1520, k1522, k1524, k1529, k1523, k1514, k1454, k1526, k1475, k1527, k1521]	2.86
k1517	O + HOCH2CH2OH	H2O + OHCH2CHO	-420.54	5.06e-23	cm^3 molecules^-1 s^-1	Group 192	[k1513, k1515, k1516, k1525, k1517, k1518, k1519, k1530, k1528, k1520, k1522, k1524, k1529, k1523, k1514, k1454, k1526, k1475, k1527, k1521]	11.05
k1518	O + HOCH2CH2OH	H2O + OHCHCHOH	-388.88	4.24e-23	cm^3 molecules^-1 s^-1	Group 192	[k1513, k1515, k1516, k1525, k1517, k1518, k1519, k1530, k1528, k1520, k1522, k1524, k1529, k1523, k1514, k1454, k1526, k1475, k1527, k1521]	9.26
k1519	O + HOCH2CH2OH	H2CO + CH2OHOH	-361.72	3.28e-23	cm^3 molecules^-1 s^-1	Group 192	[k1513, k1515, k1516, k1525, k1517, k1518, k1519, k1530, k1528, k1520, k1522, k1524, k1529, k1523, k1514, k1454, k1526, k1475, k1527, k1521]	7.17
k1520	O + HOCH2CH2OH	H2CO + CH3OOH	-97.43	2.70e-23	cm^3 molecules^-1 s^-1	Group 192	[k1513, k1515, k1516, k1525, k1517, k1518, k1519, k1530, k1528, k1520, k1522, k1524, k1529, k1523, k1514, k1454, k1526, k1475, k1527, k1521]	5.90
k1521	O + HOCH2CH2OH	CH3CH3 + O3	198.83	1.67e-25	cm^3 molecules^-1 s^-1	Group 192	[k1513, k1515, k1516, k1525, k1517, k1518, k1519, k1530, k1528, k1520, k1522, k1524, k1529, k1523, k1514, k1454, k1526, k1475, k1527, k1521]	0.04
k1522	O + HOCH2CH2OH	O2 + CH3CH2OH	-94.5	5.20e-23	cm^3 molecules^-1 s^-1	Group 192	[k1513, k1515, k1516, k1525, k1517, k1518, k1519, k1530, k1528, k1520, k1522, k1524, k1529, k1523, k1514, k1454, k1526, k1475, k1527, k1521]	11.36
k1523	O + HOCH2CH2OH	O2 + CH3OCH3	-43.69	8.39e-24	cm^3 molecules^-1 s^-1	Group 192	[k1513, k1515, k1516, k1525, k1517, k1518, k1519, k1530, k1528, k1520, k1522, k1524, k1529, k1523, k1514, k1454, k1526, k1475, k1527, k1521]	1.83
k1524	O + HOCH2CH2OH	CH3OH + CH2OO	-57.81	3.38e-23	cm^3 molecules^-1 s^-1	Group 192	[k1513, k1515, k1516, k1525, k1517, k1518, k1519, k1530, k1528, k1520, k1522, k1524, k1529, k1523, k1514, k1454, k1526, k1475, k1527, k1521]	7.38
k1525	O + HOCH2CH2OH	CH3OH + HCOOH	-438.27	3.87e-23	cm^3 molecules^-1 s^-1	Group 192	[k1513, k1515, k1516, k1525, k1517, k1518, k1519, k1530, k1528, k1520, k1522, k1524, k1529, k1523, k1514, k1454, k1526, k1475, k1527, k1521]	8.45
k1526	O + HOCH2CH2OH	CH3OH + H2CO2	44.73	2.66e-25	cm^3 molecules^-1 s^-1	Group 192	[k1513, k1515, k1516, k1525, k1517, k1518, k1519, k1530, k1528, k1520, k1522, k1524, k1529, k1523, k1514, k1454, k1526, k1475, k1527, k1521]	0.06
k1527	O + HOCH2CH2OH	HO2 + HOCHCH3	95.1	1.56e-25	cm^3 molecules^-1 s^-1	Group 192	[k1513, k1515, k1516, k1525, k1517, k1518, k1519, k1530, k1528, k1520, k1522, k1524, k1529, k1523, k1514, k1454, k1526, k1475, k1527, k1521]	0.03
k1528	O + HOCH2CH2OH	H2O2 + CH2CHOH	-119.97	3.98e-23	cm^3 molecules^-1 s^-1	Group 192	[k1513, k1515, k1516, k1525, k1517, k1518, k1519, k1530, k1528, k1520, k1522, k1524, k1529, k1523, k1514, k1454, k1526, k1475, k1527, k1521]	8.69
k1529	O + HOCH2CH2OH	H2O2 + CH2OCH2	-46.56	3.97e-23	cm^3 molecules^-1 s^-1	Group 192	[k1513, k1515, k1516, k1525, k1517, k1518, k1519, k1530, k1528, k1520, k1522, k1524, k1529, k1523, k1514, k1454, k1526, k1475, k1527, k1521]	8.67
k1530	O + HOCH2CH2OH	H2O2 + CH3CHO	-161.62	3.23e-23	cm^3 molecules^-1 s^-1	Group 192	[k1513, k1515, k1516, k1525, k1517, k1518, k1519, k1530, k1528, k1520, k1522, k1524, k1529, k1523, k1514, k1454, k1526, k1475, k1527, k1521]	7.06
k1531	O + OHCCOOH	H2O + C2O3	-314.47	4.31e-23	cm^3 molecules^-1 s^-1	Group 196	[k1537, k1532, k1533, k1531, k1536, k1539, k1538, k1534, k1535]	19.76
k1532	O + OHCCOOH	CO + H2CO3	-545.96	3.49e-23	cm^3 molecules^-1 s^-1	Group 196	[k1537, k1532, k1533, k1531, k1536, k1539, k1538, k1534, k1535]	16.00
k1533	O + OHCCOOH	HCO + HCO3	-507.76	1.82e-23	cm^3 molecules^-1 s^-1	Group 196	[k1537, k1532, k1533, k1531, k1536, k1539, k1538, k1534, k1535]	8.34
k1534	O + OHCCOOH	H2CO + CO3	-94.92	2.29e-24	cm^3 molecules^-1 s^-1	Group 196	[k1537, k1532, k1533, k1531, k1536, k1539, k1538, k1534, k1535]	1.05
k1535	O + OHCCOOH	H2O2 + C2O2	55.25	1.29e-25	cm^3 molecules^-1 s^-1	Group 196	[k1537, k1532, k1533, k1531, k1536, k1539, k1538, k1534, k1535]	0.06
k1536	O + OHCCOOH	CO2 + CH2OO	-213.54	1.04e-23	cm^3 molecules^-1 s^-1	Group 196	[k1537, k1532, k1533, k1531, k1536, k1539, k1538, k1534, k1535]	4.77
k1537	O + OHCCOOH	CO2 + HCOOH	-594.0	5.17e-23	cm^3 molecules^-1 s^-1	Group 196	[k1537, k1532, k1533, k1531, k1536, k1539, k1538, k1534, k1535]	23.70
k1538	O + OHCCOOH	CO2 + H2CO2	-111.0	1.95e-23	cm^3 molecules^-1 s^-1	Group 196	[k1537, k1532, k1533, k1531, k1536, k1539, k1538, k1534, k1535]	8.94
k1539	O + OHCCOOH	HOCO + HOCO	-192.2	3.79e-23	cm^3 molecules^-1 s^-1	Group 196	[k1537, k1532, k1533, k1531, k1536, k1539, k1538, k1534, k1535]	17.38
k1540	O + CH3CH2CHOHOH	CH3CH3 + H2CO3	-556.98	4.81e-23	cm^3 molecules^-1 s^-1	Group 161	[k1540, k1546, k1547, k1554, k1548, k1550, k1549, k1552, k1555, k1543, k1545, k1551, k1557, k1544, k1558, k1553, k1541, k1542, k1556]	8.21
k1541	O + CH3CH2CHOHOH	CH2OH + CH3OCHOH	-40.73	3.87e-23	cm^3 molecules^-1 s^-1	Group 161	[k1540, k1546, k1547, k1554, k1548, k1550, k1549, k1552, k1555, k1543, k1545, k1551, k1557, k1544, k1558, k1553, k1541, k1542, k1556]	6.61
k1542	O + CH3CH2CHOHOH	CH3O + CH3OCHOH	-1.44	1.02e-23	cm^3 molecules^-1 s^-1	Group 161	[k1540, k1546, k1547, k1554, k1548, k1550, k1549, k1552, k1555, k1543, k1545, k1551, k1557, k1544, k1558, k1553, k1541, k1542, k1556]	1.74
k1543	O + CH3CH2CHOHOH	O2 + CH3CHOHCH3	-134.94	2.75e-23	cm^3 molecules^-1 s^-1	Group 161	[k1540, k1546, k1547, k1554, k1548, k1550, k1549, k1552, k1555, k1543, k1545, k1551, k1557, k1544, k1558, k1553, k1541, k1542, k1556]	4.70
k1544	O + CH3CH2CHOHOH	O2 + CH3OCH2CH3	-81.05	2.25e-23	cm^3 molecules^-1 s^-1	Group 161	[k1540, k1546, k1547, k1554, k1548, k1550, k1549, k1552, k1555, k1543, k1545, k1551, k1557, k1544, k1558, k1553, k1541, k1542, k1556]	3.84
k1545	O + CH3CH2CHOHOH	O2 + CH3CH2CH2OH	-117.53	4.87e-23	cm^3 molecules^-1 s^-1	Group 161	[k1540, k1546, k1547, k1554, k1548, k1550, k1549, k1552, k1555, k1543, k1545, k1551, k1557, k1544, k1558, k1553, k1541, k1542, k1556]	8.32
k1546	O + CH3CH2CHOHOH	CH3OH + CH3COOH	-494.84	5.03e-23	cm^3 molecules^-1 s^-1	Group 161	[k1540, k1546, k1547, k1554, k1548, k1550, k1549, k1552, k1555, k1543, k1545, k1551, k1557, k1544, k1558, k1553, k1541, k1542, k1556]	8.59
k1547	O + CH3CH2CHOHOH	CH3OH + HCOOCH3	-423.25	4.31e-23	cm^3 molecules^-1 s^-1	Group 161	[k1540, k1546, k1547, k1554, k1548, k1550, k1549, k1552, k1555, k1543, k1545, k1551, k1557, k1544, k1558, k1553, k1541, k1542, k1556]	7.36
k1548	O + CH3CH2CHOHOH	CH3OH + OHCH2CHO	-380.78	2.99e-23	cm^3 molecules^-1 s^-1	Group 161	[k1540, k1546, k1547, k1554, k1548, k1550, k1549, k1552, k1555, k1543, k1545, k1551, k1557, k1544, k1558, k1553, k1541, k1542, k1556]	5.11
k1549	O + CH3CH2CHOHOH	CH3OH + OHCHCHOH	-349.12	2.94e-23	cm^3 molecules^-1 s^-1	Group 161	[k1540, k1546, k1547, k1554, k1548, k1550, k1549, k1552, k1555, k1543, k1545, k1551, k1557, k1544, k1558, k1553, k1541, k1542, k1556]	5.02
k1550	O + CH3CH2CHOHOH	CH2CHOH + CH2OHOH	-378.81	3.69e-23	cm^3 molecules^-1 s^-1	Group 161	[k1540, k1546, k1547, k1554, k1548, k1550, k1549, k1552, k1555, k1543, k1545, k1551, k1557, k1544, k1558, k1553, k1541, k1542, k1556]	6.30
k1551	O + CH3CH2CHOHOH	CH2CHOH + CH3OOH	-114.52	4.50e-23	cm^3 molecules^-1 s^-1	Group 161	[k1540, k1546, k1547, k1554, k1548, k1550, k1549, k1552, k1555, k1543, k1545, k1551, k1557, k1544, k1558, k1553, k1541, k1542, k1556]	7.69
k1552	O + CH3CH2CHOHOH	CH2OCH2 + CH2OHOH	-305.4	4.63e-23	cm^3 molecules^-1 s^-1	Group 161	[k1540, k1546, k1547, k1554, k1548, k1550, k1549, k1552, k1555, k1543, k1545, k1551, k1557, k1544, k1558, k1553, k1541, k1542, k1556]	7.91
k1553	O + CH3CH2CHOHOH	CH2OCH2 + CH3OOH	-41.11	1.69e-23	cm^3 molecules^-1 s^-1	Group 161	[k1540, k1546, k1547, k1554, k1548, k1550, k1549, k1552, k1555, k1543, k1545, k1551, k1557, k1544, k1558, k1553, k1541, k1542, k1556]	2.89
k1554	O + CH3CH2CHOHOH	CH3CHO + CH2OHOH	-420.46	2.69e-23	cm^3 molecules^-1 s^-1	Group 161	[k1540, k1546, k1547, k1554, k1548, k1550, k1549, k1552, k1555, k1543, k1545, k1551, k1557, k1544, k1558, k1553, k1541, k1542, k1556]	4.59
k1555	O + CH3CH2CHOHOH	CH3CHO + CH3OOH	-156.17	1.40e-23	cm^3 molecules^-1 s^-1	Group 161	[k1540, k1546, k1547, k1554, k1548, k1550, k1549, k1552, k1555, k1543, k1545, k1551, k1557, k1544, k1558, k1553, k1541, k1542, k1556]	2.39
k1556	O + CH3CH2CHOHOH	CH3CH2CH3 + O3	175.41	4.90e-26	cm^3 molecules^-1 s^-1	Group 161	[k1540, k1546, k1547, k1554, k1548, k1550, k1549, k1552, k1555, k1543, k1545, k1551, k1557, k1544, k1558, k1553, k1541, k1542, k1556]	0.01
k1557	O + CH3CH2CHOHOH	CH2OO + CH3CH2OH	-94.18	2.61e-23	cm^3 molecules^-1 s^-1	Group 161	[k1540, k1546, k1547, k1554, k1548, k1550, k1549, k1552, k1555, k1543, k1545, k1551, k1557, k1544, k1558, k1553, k1541, k1542, k1556]	4.46
k1558	O + CH3CH2CHOHOH	CH2OO + CH3OCH3	-43.37	2.50e-23	cm^3 molecules^-1 s^-1	Group 161	[k1540, k1546, k1547, k1554, k1548, k1550, k1549, k1552, k1555, k1543, k1545, k1551, k1557, k1544, k1558, k1553, k1541, k1542, k1556]	4.27
k1559	H desorption		NA	3.41e-04	s^-1	Intrinsic desorption	-	100.00
k1560	H2 desorption		NA	1.61e-03	s^-1	Intrinsic desorption	-	100.00
k1561	C desorption		NA	1.38e-03	s^-1	Intrinsic desorption	-	100.00
k1562	CH desorption		NA	2.58e-02	s^-1	Intrinsic desorption	-	100.00
k1563	CH2 desorption		NA	1.41e-03	s^-1	Intrinsic desorption	-	100.00
k1564	CH3 desorption		NA	1.07e-03	s^-1	Intrinsic desorption	-	100.00
k1565	O desorption		NA	1.06e-03	s^-1	Intrinsic desorption	-	100.00
k1566	CH4 desorption		NA	1.06e-03	s^-1	Intrinsic desorption	-	100.00
k1567	OH desorption		NA	2.23e-05	s^-1	Intrinsic desorption	-	100.00
k1568	H2O desorption		NA	2.84e-03	s^-1	Intrinsic desorption	-	100.00
k1569	C2 desorption		NA	1.06e-03	s^-1	Intrinsic desorption	-	100.00
k1570	CHCH desorption		NA	1.67e-03	s^-1	Intrinsic desorption	-	100.00
k1571	C2H3 desorption		NA	1.15e-03	s^-1	Intrinsic desorption	-	100.00
k1572	CO desorption		NA	2.55e-05	s^-1	Intrinsic desorption	-	100.00
k1573	CH2CH2 desorption		NA	7.58e-04	s^-1	Intrinsic desorption	-	100.00
k1574	HCO desorption		NA	7.77e-04	s^-1	Intrinsic desorption	-	100.00
k1575	C2H5 desorption		NA	1.14e-03	s^-1	Intrinsic desorption	-	100.00
k1576	H2CO desorption		NA	1.36e-03	s^-1	Intrinsic desorption	-	100.00
k1577	CH3CH3 desorption		NA	8.51e-04	s^-1	Intrinsic desorption	-	100.00
k1578	CH2OH desorption		NA	1.17e-03	s^-1	Intrinsic desorption	-	100.00
k1579	CH3O desorption		NA	9.83e-04	s^-1	Intrinsic desorption	-	100.00
k1580	O2 desorption		NA	1.73e-03	s^-1	Intrinsic desorption	-	100.00
k1581	CH3OH desorption		NA	1.65e-03	s^-1	Intrinsic desorption	-	100.00
k1582	HO2 desorption		NA	1.72e-03	s^-1	Intrinsic desorption	-	100.00
k1583	H2O2 desorption		NA	1.61e-03	s^-1	Intrinsic desorption	-	100.00
k1584	C3 desorption		NA	9.52e-04	s^-1	Intrinsic desorption	-	100.00
k1585	C3H3 desorption		NA	1.15e-03	s^-1	Intrinsic desorption	-	100.00
k1586	C2O desorption		NA	2.00e-03	s^-1	Intrinsic desorption	-	100.00
k1587	C3H4 desorption		NA	2.14e-04	s^-1	Intrinsic desorption	-	100.00
k1588	C2OH desorption		NA	1.21e-03	s^-1	Intrinsic desorption	-	100.00
k1589	C3H5 desorption		NA	3.42e-04	s^-1	Intrinsic desorption	-	100.00
k1590	H2CCO desorption		NA	1.32e-03	s^-1	Intrinsic desorption	-	100.00
k1591	HCCOH desorption		NA	1.39e-03	s^-1	Intrinsic desorption	-	100.00
k1592	CO2 desorption		NA	2.21e-03	s^-1	Intrinsic desorption	-	100.00
k1593	CH2CHOH desorption		NA	2.27e-03	s^-1	Intrinsic desorption	-	100.00
k1594	CH2OCH2 desorption		NA	7.07e-05	s^-1	Intrinsic desorption	-	100.00
k1595	CH3CHO desorption		NA	2.31e-05	s^-1	Intrinsic desorption	-	100.00
k1596	CH3CH2CH3 desorption		NA	6.17e-04	s^-1	Intrinsic desorption	-	100.00
k1597	HOCO desorption		NA	1.68e-03	s^-1	Intrinsic desorption	-	100.00
k1598	HOCHCH3 desorption		NA	1.14e-04	s^-1	Intrinsic desorption	-	100.00
k1599	CH2OO desorption		NA	7.45e-04	s^-1	Intrinsic desorption	-	100.00
k1600	HCOOH desorption		NA	1.58e-05	s^-1	Intrinsic desorption	-	100.00
k1601	H2CO2 desorption		NA	1.05e-03	s^-1	Intrinsic desorption	-	100.00
k1602	CH3CH2OH desorption		NA	6.85e-04	s^-1	Intrinsic desorption	-	100.00
k1603	CH3OCH3 desorption		NA	1.85e-03	s^-1	Intrinsic desorption	-	100.00
k1604	O3 desorption		NA	6.97e-04	s^-1	Intrinsic desorption	-	100.00
k1605	CH2OHOH desorption		NA	5.62e-05	s^-1	Intrinsic desorption	-	100.00
k1606	CH3OOH desorption		NA	2.42e-04	s^-1	Intrinsic desorption	-	100.00
k1607	C3O desorption		NA	1.78e-03	s^-1	Intrinsic desorption	-	100.00
k1608	C3OH desorption		NA	1.24e-03	s^-1	Intrinsic desorption	-	100.00
k1609	C2O2 desorption		NA	1.72e-03	s^-1	Intrinsic desorption	-	100.00
k1610	CH3COCH2 desorption		NA	2.41e-04	s^-1	Intrinsic desorption	-	100.00
k1611	CH3COCH3 desorption		NA	1.55e-03	s^-1	Intrinsic desorption	-	100.00
k1612	C2H3O2 desorption		NA	1.04e-04	s^-1	Intrinsic desorption	-	100.00
k1613	CO3 desorption		NA	1.64e-03	s^-1	Intrinsic desorption	-	100.00
k1614	CH3COOH desorption		NA	1.71e-03	s^-1	Intrinsic desorption	-	100.00
k1615	HCOOCH3 desorption		NA	7.53e-05	s^-1	Intrinsic desorption	-	100.00
k1616	OHCH2CHO desorption		NA	2.17e-03	s^-1	Intrinsic desorption	-	100.00
k1617	OHCHCHOH desorption		NA	3.55e-05	s^-1	Intrinsic desorption	-	100.00
k1618	CH3CHOHCH3 desorption		NA	1.54e-04	s^-1	Intrinsic desorption	-	100.00
k1619	CH3OCH2CH3 desorption		NA	1.76e-03	s^-1	Intrinsic desorption	-	100.00
k1620	CH3CH2CH2OH desorption		NA	1.68e-04	s^-1	Intrinsic desorption	-	100.00
k1621	HCO3 desorption		NA	1.81e-03	s^-1	Intrinsic desorption	-	100.00
k1622	CH3OCHOH desorption		NA	1.17e-03	s^-1	Intrinsic desorption	-	100.00
k1623	H2CO3 desorption		NA	2.47e-03	s^-1	Intrinsic desorption	-	100.00
k1624	CH3CHOHOH desorption		NA	1.69e-03	s^-1	Intrinsic desorption	-	100.00
k1625	CH3OCH2OH desorption		NA	2.08e-04	s^-1	Intrinsic desorption	-	100.00
k1626	CH3OOCH3 desorption		NA	2.86e-04	s^-1	Intrinsic desorption	-	100.00
k1627	HOCH2CH2OH desorption		NA	6.36e-05	s^-1	Intrinsic desorption	-	100.00
k1628	C3O2 desorption		NA	6.85e-04	s^-1	Intrinsic desorption	-	100.00
k1629	C2O3 desorption		NA	1.27e-03	s^-1	Intrinsic desorption	-	100.00
k1630	OHCCOOH desorption		NA	1.50e-04	s^-1	Intrinsic desorption	-	100.00
k1631	CH3CH2CHOHOH desorption		NA	1.22e-04	s^-1	Intrinsic desorption	-	100.00
